# Supplementary material for: Outcomes of Adult In-Hospital Cardiac Arrest Treated with Targeted Temperature Management: A Retrospective Cohort Study
Source: PLoS One. 2016 Nov 7;11(11):e0166148. doi: 10.1371/journal.pone.0166148 (PMC5098791; doi:10.1371/journal.pone.0166148)
Supplement: S1 Dataset — (XLSX) [file pone.0166148.s001.xlsx]

## Sheet: Original Data
Sustained ROSC	Comatous after sustained ROSC	Major Trauma	ECPR	Age	Male	Heart failure	Myocardial infarction	Arrhythmia	Hypotension before arrest	Respiratory insufficiency	Renal insufficiency	Regular dialysis	Hepatic insufficiency	Metabolic or electrolyte abnormality	Diabetes mellitus	Pneumonia	Bacteremia	Metastatic cancer or any blood borne malignancy	Pregnancy	Coagulopathy	Thrombocytopenia	Intracranial haemorrhage	Active bleeding	Acute stroke	No favourable neurological status within 24 hours before cardiac arrest	Hypotension after sustained ROSC	With at least one of the above contraindications	Arrest at night	Arrest on weekend	Arrest location	Witnessed arrest	Monitored status	Shockable rhythm	Mechanical ventilation in place at time of arrest	Antiarrhythmics in place at time of arrest	Vasopressors in place at time of arrest	Dialysis in place at time of arrest	Pulmonary artery catheter in place at time of arrest	Intra-aortic balloon pumping in place at time of arrest	CPR Duration	Fever after sustained ROSC	Highest body temperature after sustained ROSC	Lowest body temperature after sustained ROSC	Percutaneous coronary intervention after sustained ROSC	HypothemiaspSustainROSC	Withdrawal of life sustaining therapy	Survival to hospital discharge	Favourable neurological outcome
0	1	0	0	86.475	1	0	1	0	0	0	1	1	0	0	1	0	0	1	0	0	0	0	0	1	0	0	1	1	0	1	1	1	0	0	0	1	0	0	0	28	0	0	0	0	0	0	0	0
1	1	0	0	65.2985	0	0	0	0	0	1	0	0	0	0	1	0	0	1	0	1	1	0	1	0	0	1	1	1	0	1	1	1	0	0	0	1	0	0	0	24	0	34	33	0	0	0	0	0
1	1	0	0	58.2557	1	0	0	0	0	1	0	0	0	0	0	1	0	1	0	0	0	0	0	0	1	0	1	1	1	1	1	1	1	1	0	1	0	0	0	12	0	37.1	35.6	0	0	0	0	0
0	1	0	0	67.1446	0	0	0	0	0	1	1	0	0	0	0	1	0	1	0	0	0	0	0	0	0	0	0	0	0	1	1	1	0	0	0	1	0	0	0	7	0	0	0	0	0	0	0	0
0	1	0	0	63.621	0	0	0	0	0	1	1	0	0	0	0	0	0	0	0	0	0	0	1	0	1	0	1	0	1	1	1	1	0	0	0	1	0	0	0	56	0	0	0	0	0	0	0	0
0	1	0	0	59.7363	1	1	0	0	0	1	1	0	0	0	0	0	0	0	0	0	0	0	0	0	1	0	1	0	1	1	1	1	1	0	0	1	0	0	0	21	0	0	0	0	0	0	0	0
1	1	0	0	85.6592	0	0	1	0	0	0	0	0	0	0	0	0	0	0	0	0	1	0	1	0	0	1	1	1	0	1	1	1	0	0	0	0	0	0	0	10	0	34.1	34.1	0	0	0	0	0
0	1	0	0	70.5811	0	1	0	1	0	0	0	0	0	0	1	1	0	0	0	0	0	0	0	0	0	0	0	1	0	1	1	1	0	0	1	0	0	0	0	30	0	0	0	0	0	0	0	0
0	1	0	0	66.6807	0	1	0	0	0	1	1	1	0	0	0	0	0	0	0	0	0	0	0	0	1	0	1	1	0	1	1	1	0	0	0	1	1	0	0	22	0	0	0	0	0	0	0	0
1	1	0	0	90.1704	1	0	1	0	0	1	1	0	0	1	0	1	0	0	0	0	1	0	1	0	1	0	1	1	0	1	1	1	0	0	0	1	1	0	0	5	0	35.6	35.6	0	0	0	0	0
1	1	0	0	62.8196	1	0	1	0	1	1	1	0	1	1	0	0	0	0	0	1	1	0	0	0	1	1	1	1	1	3	1	1	0	0	0	1	0	0	0	22	0	34.8	34.3	0	0	0	0	0
1	1	0	0	97.044	0	1	0	0	0	1	0	0	0	0	1	1	0	0	0	0	0	0	0	0	0	0	0	1	1	2	1	0	0	0	0	0	0	0	0	16	0	36.7	35.2	0	0	0	0	0
0	1	0	0	77.2183	1	0	0	0	0	1	1	0	0	0	0	1	0	0	0	0	0	0	1	0	1	0	1	1	0	2	1	0	0	0	0	0	0	0	0	49	0	0	0	0	0	0	0	0
1	1	0	0	79.7682	1	0	1	0	0	0	1	1	0	0	0	0	0	0	0	0	0	0	0	0	0	0	0	0	1	1	1	1	0	0	0	0	0	0	0	7	0	36.8	34.6	0	0	0	1	1
1	1	0	0	63.261	0	0	1	0	1	1	0	0	0	0	1	0	0	0	0	1	1	0	0	0	1	0	1	1	0	1	1	1	0	0	0	1	0	0	0	6	0	36.3	34.8	0	0	0	0	0
1	1	0	0	76.4998	1	0	0	0	0	1	0	0	0	0	1	1	0	0	0	0	0	0	0	0	0	0	0	0	0	1	1	1	0	0	0	0	0	0	0	13	1	39.8	36.8	0	0	0	0	0
0	1	0	0	76.7777	1	0	1	0	0	1	1	0	0	0	0	0	0	0	0	0	0	0	0	0	1	0	1	1	0	1	1	1	0	0	0	1	0	0	0	61	0	0	0	0	0	0	0	0
0	1	0	0	91.5274	1	0	0	0	1	1	0	0	0	0	0	1	0	0	0	0	0	0	0	0	1	0	1	0	0	1	1	1	0	0	0	1	0	0	0	34	0	0	0	0	0	0	0	0
0	1	0	0	58.5445	0	1	0	0	0	1	1	1	0	0	0	0	0	0	0	0	0	0	0	0	1	0	1	0	0	1	1	1	0	0	0	1	0	0	0	31	0	0	0	0	0	0	0	0
0	1	0	0	72.1938	1	0	0	0	1	1	0	0	0	0	0	0	0	1	0	0	0	0	1	0	1	0	1	1	0	1	1	1	0	0	0	1	0	0	0	30	0	0	0	0	0	0	0	0
1	1	0	0	73.3879	0	0	1	0	1	1	1	0	0	0	1	0	0	0	0	0	0	0	0	0	1	0	1	1	0	2	0	0	0	0	0	0	0	0	0	38	0	36.8	36.2	0	0	0	0	0
0	1	0	0	56.1956	0	0	0	0	0	1	0	0	0	0	0	0	0	0	0	0	0	0	1	0	0	0	1	0	1	2	1	1	0	0	0	0	0	0	0	18	0	0	0	0	0	0	0	0
0	1	0	0	74.0034	1	0	1	0	1	0	0	0	0	0	1	0	0	0	0	0	0	0	0	0	1	0	1	1	0	2	0	1	0	0	0	0	0	0	0	42	0	0	0	0	0	0	0	0
1	1	0	0	83.8024	1	0	1	0	0	1	1	1	0	0	0	0	1	0	0	0	0	0	1	0	1	1	1	1	1	1	1	1	0	0	0	1	0	0	0	16	0	37.1	35.6	0	0	0	0	0
1	0	0	0	45.9617	1	1	0	0	0	1	0	0	0	0	0	0	0	0	0	0	0	0	0	0	1	1	1	0	0	2	1	0	0	1	0	1	1	0	0	17	0	37.7	35.7	0	0	0	1	1
0	1	0	0	65.9243	0	0	1	0	0	0	0	0	1	0	0	0	0	1	0	0	0	0	0	0	0	0	0	1	1	2	0	1	0	0	0	0	0	0	0	38	0	0	0	0	0	0	0	0
1	1	0	0	29.4191	1	0	0	0	1	1	1	1	0	0	0	0	0	0	0	0	0	0	0	0	0	1	1	1	0	1	1	1	0	0	0	1	0	0	0	20	0	36.4	36.4	0	0	0	0	0
1	1	0	0	77.6063	1	1	0	0	0	0	0	0	0	0	1	0	0	0	0	0	0	0	0	0	1	1	1	0	1	1	1	1	0	0	0	1	0	0	0	46	0	36.6	36.6	0	0	0	0	0
0	1	0	0	95.4655	0	1	0	0	0	0	0	0	0	0	1	0	0	0	0	0	0	0	0	0	1	0	1	1	0	4	1	0	0	0	0	1	0	0	0	130	0	0	0	0	0	0	0	0
0	1	0	0	86.1276	0	0	0	0	0	1	0	0	0	0	1	0	0	0	0	0	0	0	0	0	0	0	0	1	0	2	1	1	0	0	0	1	0	0	0	37	0	0	0	0	0	0	0	0
1	1	0	0	72.7976	0	0	1	0	0	0	1	1	0	0	1	0	0	0	0	0	0	0	0	1	1	1	1	1	0	2	0	0	0	0	0	0	0	0	0	20	0	35.3	34.1	0	0	0	0	0
1	1	0	0	69.4305	1	1	0	0	0	0	1	0	0	0	1	0	0	0	0	1	1	0	1	0	1	0	1	0	0	3	1	0	0	0	0	0	0	0	0	53	0	36.4	35.6	0	0	0	0	0
1	0	0	0	73.4095	1	1	0	0	1	1	1	1	0	0	0	0	1	0	0	1	0	0	0	0	1	0	1	1	0	1	1	1	0	0	1	0	0	0	0	8	1	38.5	37.1	0	0	0	0	0
1	1	0	0	51.7542	0	0	0	0	0	1	1	1	0	0	1	1	0	0	0	0	0	0	0	0	1	1	1	1	1	1	1	1	0	0	0	1	0	0	0	67	0	37.3	34.8	0	0	0	1	0
1	1	0	0	52.7051	0	0	0	0	0	1	0	0	1	0	0	1	0	0	0	1	0	0	0	0	0	0	1	0	0	1	1	1	0	0	0	1	0	0	0	8	0	37.4	37.2	0	0	0	0	0
1	1	0	0	68.3032	0	0	0	0	0	1	1	0	1	0	0	0	0	0	0	0	1	0	1	0	1	0	1	1	1	1	1	1	0	0	0	1	0	0	0	2	1	38.4	36	0	0	0	0	0
1	1	0	0	76.1875	1	0	1	0	0	0	1	0	0	0	1	1	0	0	0	0	0	0	0	0	0	1	1	0	0	1	1	1	1	0	0	1	0	0	1	5	0	34.8	34.2	1	0	0	0	0
0	1	1	0	40.5403	0	0	0	0	1	1	0	0	0	0	0	0	1	1	0	0	0	0	0	0	1	0	1	0	0	2	1	1	0	0	0	0	0	0	0	63	0	0	0	0	0	0	0	0
1	1	0	0	73.3506	0	0	0	0	1	1	0	0	0	0	0	0	0	0	0	1	0	0	0	0	1	0	1	1	1	2	1	1	0	0	0	0	0	0	0	3	0	37.8	35.8	0	0	0	0	0
1	1	0	0	64.6757	0	0	0	0	0	0	0	0	0	0	0	1	0	1	0	0	0	0	0	0	1	1	1	1	1	2	0	0	0	0	0	0	0	0	0	31	1	38.3	34.9	0	0	0	0	0
1	1	0	0	65.0899	1	0	0	0	1	1	0	0	0	0	0	1	0	1	0	0	0	0	0	0	0	0	0	1	1	1	1	1	0	0	0	0	0	0	0	2	1	38.5	36.6	0	0	0	0	0
1	1	0	0	68.19	0	0	0	1	0	0	1	1	0	0	0	1	1	0	0	0	0	0	1	0	1	0	1	0	0	2	1	0	0	0	0	0	1	0	0	55	0	36.2	34.8	0	0	0	1	0
0	1	0	0	73.9144	1	0	0	0	0	1	0	0	0	0	0	1	0	0	0	0	0	0	0	0	0	0	0	1	0	2	1	0	0	1	0	1	0	0	0	40	0	0	0	0	0	0	0	0
1	0	0	0	67.1591	1	0	0	0	0	1	1	1	0	0	1	1	0	0	0	0	0	0	0	0	1	0	1	1	0	1	1	1	1	0	0	0	0	0	0	2	0	37.6	36.4	0	0	0	0	0
1	1	0	0	73.0032	0	0	0	0	1	1	1	0	0	0	1	0	0	0	0	0	0	0	1	0	1	0	1	0	1	1	1	1	0	0	0	1	0	0	0	4	1	38.4	35.2	0	0	0	0	0
1	1	0	0	52.2043	1	0	0	0	1	1	1	1	0	0	1	1	0	1	0	0	0	0	0	0	1	0	1	0	1	2	1	0	0	1	0	1	0	0	0	22	0	36.3	33	0	0	0	1	0
0	1	0	0	60.863	0	0	0	0	1	1	1	0	1	0	0	0	0	1	0	0	0	0	1	0	1	0	1	1	0	1	1	1	0	0	0	1	0	0	0	31	0	0	0	0	0	0	0	0
0	1	0	0	69.8632	0	0	0	0	1	1	1	0	0	0	0	1	0	1	0	0	0	0	0	0	1	0	1	0	0	1	1	1	0	0	0	1	0	0	0	32	0	0	0	0	0	0	0	0
0	1	0	0	87.8635	1	0	0	0	0	0	1	0	0	0	1	0	0	1	0	0	0	0	0	0	1	0	1	1	0	2	1	0	0	0	0	0	0	0	0	45	0	0	0	0	0	0	0	0
1	1	0	0	41.677	0	0	0	0	1	1	1	1	0	0	1	1	0	1	0	0	1	0	0	0	0	0	1	0	1	1	1	1	0	0	0	1	1	0	0	42	0	37.8	35	0	0	0	0	0
1	1	0	0	73.0481	1	0	0	0	0	1	1	0	0	0	0	0	0	0	0	0	0	0	0	0	0	0	0	1	0	2	1	0	0	1	0	1	0	0	0	19	0	37.4	35.8	0	0	0	1	0
0	1	0	0	51.9605	0	0	0	0	1	1	1	1	0	0	0	0	0	0	0	0	0	0	0	0	0	0	0	0	0	1	1	1	0	0	0	1	1	0	0	31	0	0	0	0	0	0	0	0
1	1	0	0	50.8878	0	0	0	0	1	0	0	0	0	0	0	0	0	1	0	0	0	0	0	0	0	1	1	1	0	1	1	1	0	0	0	1	0	0	0	13	0	35	34	0	0	0	0	0
0	1	0	0	83.008	0	1	0	0	0	1	1	1	0	0	1	1	0	0	0	0	0	0	0	0	0	0	0	0	0	2	1	0	0	0	0	0	1	0	0	107	0	0	0	0	0	0	0	0
0	1	0	0	49.4712	0	0	0	0	1	1	1	0	0	0	0	1	0	0	0	0	0	0	1	0	1	0	1	0	0	1	1	1	0	0	0	1	0	0	0	43	0	0	0	0	0	0	0	0
1	1	0	0	81.4551	1	0	0	0	1	1	1	1	0	0	1	1	0	1	0	1	0	0	0	0	1	0	1	0	1	1	1	1	0	0	0	0	0	0	0	18	0	37.2	36.4	0	0	0	1	0
1	1	0	0	85.3387	1	0	1	0	0	1	1	1	0	0	1	1	1	1	0	0	0	0	0	0	1	0	1	1	0	2	0	0	0	0	0	0	0	0	0	6	0	36.5	35.4	0	0	0	1	0
0	1	0	0	42.7436	0	0	0	0	0	1	1	0	0	0	0	0	0	1	0	0	0	0	0	0	0	0	0	1	0	1	1	1	0	0	1	0	0	0	0	72	0	0	0	0	0	0	0	0
0	1	0	0	83.33	0	0	0	0	0	0	0	0	0	0	0	0	0	0	0	0	0	0	0	0	0	0	0	1	1	2	1	1	0	0	0	0	0	0	0	87	0	0	0	0	0	0	0	0
0	1	0	0	86.5133	0	0	0	0	1	1	1	0	0	0	0	0	0	0	0	0	0	0	0	0	1	0	1	1	0	4	1	1	0	0	1	1	0	0	0	103	0	0	0	0	0	0	0	0
0	1	0	0	61.3699	0	0	0	0	1	1	1	0	0	0	0	0	0	1	0	0	0	0	1	0	0	0	1	0	0	1	1	1	0	0	0	1	0	0	0	41	0	0	0	0	0	0	0	0
0	1	0	0	68.7233	1	1	0	0	1	1	1	1	0	0	1	0	1	0	0	0	0	0	0	0	1	0	1	1	1	1	1	1	0	0	0	1	1	0	0	30	0	0	0	0	0	0	0	0
1	1	0	0	89.571	0	1	0	0	0	1	1	0	1	0	0	0	1	0	0	0	0	0	0	0	1	0	1	1	1	1	1	1	0	0	0	1	0	0	0	6	1	40.2	40.2	0	0	0	0	0
1	1	0	0	78.4432	0	0	0	0	0	0	0	0	0	0	1	0	0	1	0	0	0	0	0	0	1	0	1	0	0	2	1	0	0	0	0	0	0	0	0	4	1	38	36	0	0	0	1	0
1	1	0	0	54.7585	0	0	0	0	1	1	1	1	0	0	1	1	0	0	0	0	0	0	1	0	1	0	1	0	0	1	1	1	0	1	0	1	1	0	0	7	0	37.1	35.6	0	0	0	0	0
1	1	0	0	73.6203	0	0	0	0	0	0	1	1	0	0	0	0	0	1	0	1	0	0	0	0	1	0	1	1	0	1	1	1	0	0	0	1	1	0	0	5	0	37.1	35.9	0	0	0	0	0
1	1	0	0	46.7945	1	1	0	0	0	1	0	0	1	0	0	0	0	1	0	0	1	0	0	0	1	1	1	0	0	2	1	0	1	0	0	0	0	0	0	5	1	40.3	35.6	0	0	0	0	0
1	1	0	0	60.7416	1	0	0	0	1	1	0	0	0	0	0	0	0	1	0	1	1	0	0	0	1	0	1	1	0	1	1	1	0	0	0	1	0	0	0	8	0	37.1	35.6	0	0	0	0	0
1	1	0	0	69.6666	1	0	0	0	1	1	0	0	0	0	0	1	0	0	0	0	0	0	0	0	0	1	1	1	1	2	1	1	0	1	0	1	0	0	0	43	1	39.5	35.3	0	0	0	0	0
0	1	0	0	79.2455	1	1	1	0	0	1	0	0	0	0	0	0	1	0	0	0	0	0	0	1	1	0	1	0	0	1	1	1	0	0	0	1	1	0	0	12	0	0	0	0	0	0	0	0
1	1	0	0	75.5164	0	0	0	0	0	1	1	0	0	0	0	0	0	0	0	1	0	0	1	0	1	0	1	0	0	1	1	1	1	1	0	0	0	0	0	4	0	37.3	36	0	0	0	1	1
1	1	0	0	36.5959	1	0	0	0	0	1	1	1	1	1	0	0	0	0	0	0	1	0	1	0	1	0	1	0	0	1	1	1	0	0	0	1	1	0	0	32	0	36.4	34.8	0	0	0	1	1
0	1	0	0	72.1731	0	1	0	0	0	0	1	1	0	0	1	0	0	0	0	0	0	0	0	0	0	0	0	1	0	2	1	0	0	0	0	0	0	0	0	107	0	0	0	0	0	0	0	0
0	1	0	0	74.0738	0	1	0	0	1	1	1	1	1	0	1	1	0	0	0	0	0	0	1	0	1	0	1	0	0	1	1	1	1	0	1	1	0	0	0	36	0	0	0	0	0	0	0	0
1	1	0	0	56.2196	0	0	0	0	0	1	0	0	0	0	0	1	1	1	0	0	0	0	0	0	0	0	0	1	1	2	0	0	0	0	0	0	0	0	0	77	0	37.1	35.6	0	0	0	0	0
0	1	0	0	71.5221	1	0	0	0	0	1	0	0	0	0	0	1	0	1	0	0	0	0	0	0	1	0	1	0	0	1	1	1	0	0	0	0	0	0	0	22	0	0	0	0	0	0	0	0
1	1	0	0	81.9971	1	0	0	0	1	1	1	1	0	0	0	0	0	0	0	0	1	0	1	0	1	0	1	0	0	1	1	1	0	1	1	1	0	0	0	5	1	38.2	36	0	0	0	0	0
0	1	0	0	46.1	0	0	0	0	1	1	1	1	0	0	0	0	0	1	0	0	0	0	0	0	0	0	0	1	0	1	1	1	0	0	0	1	0	0	0	67	0	0	0	0	0	0	0	0
0	1	1	0	31.0222	0	0	0	0	1	1	0	0	0	1	0	1	1	1	0	0	0	0	1	0	0	0	1	1	1	1	1	1	0	0	0	1	0	0	0	30	0	0	0	0	0	0	0	0
1	1	0	0	57.8264	1	0	0	0	1	1	0	0	1	1	0	1	0	0	0	0	1	0	0	0	1	0	1	1	0	1	1	1	0	0	0	1	0	0	0	14	0	34.7	34.5	0	0	0	0	0
1	1	0	0	87.4015	1	1	1	0	0	1	1	1	0	1	1	1	0	0	0	0	0	0	0	0	1	0	1	0	1	1	1	1	0	0	0	0	0	0	0	12	0	37.8	35.9	0	0	0	1	0
0	1	0	0	63.4353	1	1	0	0	0	0	0	0	0	0	0	0	0	0	0	0	0	0	0	0	1	0	1	1	0	1	1	1	0	0	0	1	0	0	0	100	0	0	0	0	0	0	0	0
1	1	0	0	55.7485	0	1	0	0	1	1	1	0	0	0	0	0	0	0	0	0	0	0	0	0	1	1	1	1	1	1	1	1	0	0	0	1	0	0	0	29	0	34.8	33.9	0	0	0	0	0
1	1	0	0	79.6348	0	0	0	0	0	0	0	0	0	0	1	0	0	0	0	0	0	0	0	0	1	1	1	0	1	1	1	1	0	0	0	0	0	0	0	35	0	36	35	0	0	0	0	0
1	1	0	0	81.533	0	1	0	0	0	1	0	0	0	0	0	0	0	0	0	1	0	0	1	0	1	0	1	1	0	1	1	1	1	0	1	1	0	0	0	5	0	36.8	36.2	0	0	0	1	0
0	1	0	0	81.0776	1	0	0	0	0	0	0	0	0	0	0	0	0	0	0	0	0	0	0	0	0	0	0	0	0	2	1	0	1	0	0	0	0	0	0	29	0	0	0	0	0	0	0	0
1	1	0	0	64.4002	1	0	0	0	0	0	1	1	1	0	1	0	0	0	0	1	1	0	0	0	0	1	1	1	1	2	0	0	0	0	0	0	0	0	0	17	1	39.2	35.8	0	0	0	0	0
1	1	0	0	91.6525	1	1	0	0	0	1	0	0	0	0	0	0	0	0	0	0	0	0	0	0	0	1	1	1	0	2	0	0	0	0	0	0	0	0	0	35	0	34.2	34.2	0	0	0	0	0
1	1	0	0	42.3519	0	0	0	0	0	1	1	1	1	0	0	1	0	1	0	0	0	0	0	0	1	0	1	1	0	1	1	1	0	0	0	1	0	0	0	18	0	37.1	35.6	0	0	0	0	0
1	1	0	0	45.9649	1	0	0	0	0	1	1	0	1	0	1	0	0	0	0	0	1	0	1	0	1	1	1	0	0	1	1	1	0	0	0	1	0	0	0	7	0	37.1	35.6	0	0	0	0	0
0	1	0	0	42.4959	1	0	0	0	0	1	0	0	1	0	0	1	0	0	0	0	0	0	0	0	1	0	1	0	0	1	1	1	0	0	0	0	0	0	0	4	0	0	0	0	0	0	0	0
0	1	0	0	55.401	1	0	0	0	1	1	1	0	0	0	0	0	0	0	0	0	0	0	0	0	1	0	1	1	1	1	1	1	0	0	0	1	0	0	0	47	0	0	0	0	0	0	0	0
0	1	0	0	82.5059	1	0	0	0	0	1	1	0	0	0	0	0	0	1	0	0	0	0	0	0	0	0	0	1	0	2	1	1	0	0	0	0	0	0	0	50	0	0	0	0	0	0	0	0
1	1	0	0	85.7242	0	1	0	0	0	1	1	1	0	0	0	1	1	0	0	0	0	0	0	0	0	0	0	1	0	1	1	1	0	0	0	1	0	0	0	5	1	39.2	36	0	0	0	0	0
1	0	0	0	31.1715	0	1	0	0	0	1	0	0	0	0	0	0	0	1	0	0	0	0	0	0	1	0	1	0	1	1	1	1	0	0	0	0	0	0	0	17	0	0	0	0	0	0	0	0
0	1	0	0	81.4271	1	0	0	0	0	1	0	0	0	0	0	1	0	1	0	0	0	0	0	0	0	0	0	1	1	2	0	0	0	0	0	0	0	0	0	38	0	0	0	0	0	0	0	0
1	1	0	0	49.1825	0	0	0	0	1	1	0	0	0	1	0	0	0	1	0	0	0	0	0	0	0	0	0	1	1	2	1	0	0	0	0	0	0	0	0	10	0	37.1	35.6	0	0	0	0	0
0	1	0	0	69.2187	0	0	0	0	0	1	0	0	0	0	0	0	0	1	0	0	0	0	0	0	1	0	1	1	0	2	1	0	0	0	0	1	0	0	0	125	0	0	0	0	0	0	0	0
0	1	0	0	82.344	0	0	0	0	0	1	1	NA	0	0	0	0	0	0	0	0	0	0	0	0	1	0	1	1	0	2	1	1	0	0	0	0	1	0	0	226	0	0	0	0	0	0	0	0
1	1	0	0	80.621	0	0	0	0	0	1	0	0	0	0	0	1	0	0	0	1	0	0	0	0	1	0	1	1	1	1	1	1	0	1	0	1	0	0	0	3	0	36.6	36.2	0	0	0	0	0
1	1	0	0	59.5443	0	0	0	0	0	1	0	0	0	0	0	0	0	0	0	0	0	1	0	1	0	0	1	0	0	1	1	1	0	0	0	0	0	0	0	17	0	36.2	35.6	0	0	0	0	0
0	1	0	0	38.5761	1	0	0	0	0	0	0	0	0	0	0	0	0	0	0	0	0	0	0	0	0	0	0	1	1	2	1	0	0	1	0	1	0	0	0	42	0	0	0	0	0	0	0	0
1	1	0	0	80.3991	0	0	0	0	0	0	0	0	0	0	0	0	0	1	0	1	0	0	0	0	1	0	1	1	1	2	1	0	0	0	1	0	0	0	0	15	0	37.8	35.4	0	0	0	0	0
1	1	0	0	84.1784	0	0	0	0	0	0	0	0	0	0	1	1	0	0	0	1	0	0	0	0	1	0	1	1	1	2	1	0	0	0	0	0	0	0	0	65	0	36.2	35.6	0	0	0	0	0
1	1	0	0	81.3188	1	0	0	0	1	1	1	0	0	1	0	1	0	0	0	0	0	0	0	0	0	1	1	0	0	2	1	0	0	0	0	1	0	0	0	35	0	37	35.4	0	0	0	1	0
1	1	0	0	78.8081	1	0	0	0	0	0	0	0	0	0	0	0	0	0	0	0	0	0	0	0	0	0	0	0	0	2	0	1	1	0	0	0	0	0	0	17	0	37.5	34.9	0	0	0	1	0
0	1	0	0	69.9824	0	0	1	0	0	1	0	0	0	0	1	0	0	0	0	0	0	0	0	0	1	0	1	1	1	2	0	0	0	0	0	0	0	0	0	39	0	0	0	0	0	0	0	0
1	1	0	0	43.3507	1	0	1	0	0	0	0	0	0	0	0	1	0	1	0	0	0	0	1	0	0	1	1	1	1	2	1	1	0	0	0	0	0	0	0	98	0	37.6	34.2	0	0	0	0	0
0	1	0	0	47.0371	0	1	0	0	0	1	1	0	1	0	0	0	0	0	0	0	0	0	0	0	1	0	1	1	0	1	1	1	0	1	0	1	0	0	0	39	0	0	0	0	0	0	0	0
0	1	0	0	52.5508	0	0	0	0	1	1	1	0	0	0	1	0	0	0	0	0	0	0	0	0	1	0	1	1	0	1	1	1	0	1	1	1	1	0	0	40	0	0	0	0	0	0	0	0
0	1	0	0	50.8855	1	1	0	0	0	1	0	0	0	0	1	1	1	0	0	0	0	0	1	0	1	0	1	1	0	1	1	1	0	1	0	1	0	0	0	60	0	0	0	0	0	0	0	0
1	1	0	0	27.1187	0	1	0	0	0	1	1	0	1	0	0	1	0	1	0	0	1	0	1	0	1	0	1	1	0	2	1	0	0	0	0	0	0	0	0	9	0	36.8	35	0	0	0	0	0
0	1	0	0	78.8919	0	0	0	0	1	1	1	1	0	0	1	0	0	0	0	0	0	0	1	0	1	0	1	1	0	2	1	1	0	1	1	1	0	0	0	47	0	0	0	0	0	0	0	0
1	1	0	0	88.2294	1	1	0	0	0	0	1	0	0	1	0	1	0	0	0	1	0	0	1	0	1	1	1	1	1	2	1	0	0	0	0	0	1	0	0	15	0	36.8	34	0	0	0	1	0
1	0	0	0	75.3462	0	1	0	0	0	1	0	0	0	0	1	0	0	0	0	0	0	0	0	0	1	0	1	1	0	1	1	1	1	1	0	1	0	0	0	6	1	38	36.2	1	0	0	1	1
0	1	0	0	88.0988	1	0	1	0	0	1	1	0	0	0	0	1	0	0	0	0	0	0	0	0	1	0	1	1	0	2	0	0	0	1	1	1	0	0	0	73	0	0	0	0	0	0	0	0
0	1	0	0	48.4032	1	1	0	0	0	1	0	0	1	0	1	0	0	0	0	0	0	0	0	0	1	0	1	1	0	2	0	0	0	0	0	0	0	0	0	45	0	0	0	0	0	0	0	0
0	1	0	0	53.3343	1	0	0	0	0	1	0	0	1	0	0	1	0	0	0	0	0	0	0	0	1	0	1	0	0	1	1	1	0	1	0	1	0	0	0	47	0	0	0	0	0	0	0	0
1	1	0	0	50.8897	1	0	0	0	0	0	0	0	1	0	1	0	0	0	0	1	1	0	1	0	1	0	1	0	0	1	1	1	0	0	0	0	0	0	0	10	0	37.4	31	0	0	0	0	0
1	1	0	0	77.1694	1	0	0	0	0	1	1	0	1	0	0	1	0	0	0	0	0	0	0	0	0	0	0	1	0	2	1	0	1	0	0	0	0	0	0	46	0	37.5	35	0	0	0	1	1
1	1	0	0	84.3371	1	0	0	0	0	1	0	0	0	0	0	0	0	0	0	1	0	0	0	0	0	0	1	1	1	2	0	0	0	0	0	0	0	0	0	6	0	37.5	36.2	0	0	0	0	0
1	1	0	0	48.4683	0	0	0	0	0	1	1	0	1	1	0	0	0	1	0	0	1	0	1	0	1	0	1	1	0	1	1	1	0	1	0	1	1	0	0	33	0	37.1	35.6	0	0	0	0	0
0	1	0	0	50.7323	1	0	0	0	1	1	1	0	1	0	0	0	1	0	0	0	0	0	0	0	1	0	1	1	0	1	1	1	0	1	0	1	0	0	0	10	0	0	0	0	0	0	0	0
0	1	0	0	66.9955	1	1	0	0	0	1	0	0	1	0	0	0	0	0	0	0	0	0	0	0	1	0	1	1	1	2	0	0	0	0	0	0	0	0	0	76	0	0	0	0	0	0	0	0
1	1	0	0	75.5789	0	1	0	0	0	1	1	1	0	0	1	1	0	0	0	0	0	0	0	0	1	0	1	1	0	1	1	1	0	1	0	1	1	0	0	4	0	32	32	0	0	0	0	0
1	1	0	0	80.6819	0	0	0	0	0	0	1	1	0	0	0	0	0	1	0	0	0	0	0	0	0	1	1	1	0	2	1	0	0	0	0	1	1	0	0	10	0	37.2	35.7	0	0	0	0	0
0	1	0	0	28.8685	0	1	0	0	1	1	0	0	0	0	0	0	0	0	0	0	0	0	0	0	1	0	1	1	0	1	1	1	0	1	0	1	0	0	0	52	0	0	0	0	0	0	0	0
0	1	0	0	42.5449	1	0	0	0	0	1	0	0	0	0	0	0	0	0	0	0	0	0	1	0	1	0	1	0	0	1	1	1	0	1	1	1	0	0	0	68	0	0	0	0	0	0	0	0
1	1	0	0	67.7919	0	0	0	0	0	1	1	0	0	1	0	1	0	1	0	1	1	0	1	0	1	0	1	1	0	1	1	1	0	0	0	0	0	0	0	15	0	37.1	35.6	0	0	0	0	0
0	1	0	0	81.0245	0	0	0	0	0	0	0	0	0	0	1	0	0	0	0	0	0	0	0	0	0	0	0	1	0	2	1	0	1	1	1	1	0	0	0	23	0	0	0	0	0	0	0	0
0	1	0	0	59.3153	1	0	0	0	1	1	0	0	0	0	0	0	1	1	0	0	0	0	0	0	1	0	1	1	0	1	1	1	0	1	1	1	0	0	0	49	0	0	0	0	0	0	0	0
0	1	0	0	75.3464	0	1	0	0	1	1	1	0	1	0	0	0	0	0	0	0	0	0	1	0	1	0	1	1	1	1	1	1	0	1	1	1	1	0	0	35	0	0	0	0	0	0	0	0
1	1	0	0	82.5588	0	0	0	0	0	1	1	0	0	0	1	0	1	0	0	0	0	0	1	0	1	0	1	0	1	1	1	1	1	0	1	0	0	0	0	5	0	37.4	36.4	1	0	0	1	0
1	1	0	0	85.9241	1	0	0	0	0	1	0	0	0	0	0	0	0	0	0	0	1	0	0	0	1	1	1	1	0	1	1	1	0	0	0	0	0	0	0	31	1	38.9	33.5	0	0	0	0	0
0	1	0	0	77.1745	0	1	0	0	1	1	1	0	0	0	0	1	0	0	0	0	0	0	0	0	0	0	0	1	0	1	1	1	0	0	1	1	1	0	0	40	0	0	0	0	0	0	0	0
0	1	0	0	42.495	1	0	0	0	1	1	1	1	1	0	0	0	1	1	0	0	0	0	0	0	0	0	0	1	0	1	1	1	0	1	0	1	1	0	0	30	0	0	0	0	0	0	0	0
1	1	0	0	67.2116	1	0	0	0	0	1	0	0	0	0	1	1	0	1	0	0	0	0	1	1	0	0	1	1	0	2	0	0	0	0	0	0	0	0	0	15	0	36.8	35.6	0	0	0	0	0
0	1	0	0	37.9973	0	1	0	0	1	1	1	1	1	1	0	0	0	0	0	0	0	0	0	0	1	0	1	0	1	1	1	1	0	1	0	1	0	0	0	13	0	0	0	0	0	0	0	0
1	1	0	0	54.3412	1	0	0	0	0	1	0	0	0	0	0	1	0	1	0	0	0	0	0	0	1	1	1	1	0	2	1	0	0	0	0	0	0	0	0	26	0	36	35.9	0	0	0	0	0
1	1	0	0	72.4347	1	1	1	0	1	1	1	1	0	1	1	1	0	0	0	0	0	0	0	0	1	0	1	1	0	1	1	1	0	1	0	1	0	0	0	2	1	39.2	36.1	0	0	0	0	0
1	1	0	0	58.5954	1	0	0	0	1	1	1	0	0	0	0	1	1	1	0	1	1	0	0	0	0	0	1	1	0	2	1	0	0	0	0	0	0	0	0	9	1	38	36	0	0	0	0	0
1	1	0	0	78.7419	0	0	1	0	0	1	1	0	1	1	1	0	1	0	0	0	0	0	0	0	1	0	1	0	0	1	1	1	0	0	0	0	0	0	0	10	0	37.4	36.2	0	0	0	0	0
1	1	0	0	85.8606	0	1	0	0	0	1	1	1	0	0	0	1	0	0	0	0	0	0	1	0	1	1	1	0	0	1	1	1	0	0	0	0	1	0	0	25	0	37.9	35	0	0	0	1	0
1	1	0	0	83.9989	0	0	0	1	1	1	1	1	0	1	0	0	0	0	0	0	0	0	0	0	0	0	0	0	1	2	0	1	0	0	0	0	1	0	0	65	0	37.1	35.6	0	0	0	0	0
0	1	0	0	84.1076	1	0	0	0	0	0	0	0	1	1	0	0	0	1	0	0	0	0	1	0	0	0	1	1	0	2	0	0	0	0	0	0	0	0	0	25	0	0	0	0	0	0	0	0
0	1	0	0	81.3367	0	0	0	0	0	1	0	0	0	1	0	0	0	1	0	0	0	0	0	0	0	0	0	1	0	2	0	0	0	0	0	0	0	0	0	16	0	0	0	0	0	0	0	0
1	1	0	0	84.7254	0	0	0	0	0	1	1	0	0	0	0	1	0	0	0	0	0	0	0	0	0	0	0	1	1	2	0	0	0	0	0	0	0	0	0	10	0	37.1	35.6	0	0	0	0	0
0	1	0	0	75.655	1	0	0	0	0	1	1	0	0	0	0	0	0	0	0	0	0	0	0	0	1	0	1	1	1	1	1	1	0	1	0	1	0	0	0	44	0	0	0	0	0	0	0	0
0	1	0	0	75.3483	1	0	0	0	0	0	1	0	0	1	1	0	0	0	0	0	0	0	0	0	1	0	1	1	0	2	0	0	0	0	0	0	0	0	0	35	0	0	0	0	0	0	0	0
0	1	0	0	62.7725	1	0	0	0	1	0	0	0	1	0	0	0	1	0	0	0	0	0	1	0	1	0	1	0	0	2	1	1	0	0	0	1	0	0	0	33	0	0	0	0	0	0	0	0
0	1	0	0	36.8113	1	0	0	0	0	0	1	0	0	1	0	0	0	0	0	0	0	0	0	0	1	0	1	0	1	1	1	1	1	1	0	1	0	0	0	68	0	0	0	0	0	0	0	0
1	1	0	0	53.1185	1	0	0	0	1	1	1	0	0	0	0	1	0	0	0	0	0	0	0	0	1	0	1	0	0	1	1	1	1	1	0	1	0	0	0	7	1	38.5	35.8	0	0	0	0	0
0	1	0	0	83.932	1	1	0	0	1	0	1	0	0	0	1	0	0	0	0	0	0	0	0	0	1	0	1	1	0	1	1	1	1	0	0	1	0	0	0	56	0	0	0	0	0	0	0	0
0	1	0	0	92.4171	0	1	0	0	0	1	0	0	0	0	1	1	0	0	0	0	0	0	0	0	0	0	0	0	0	2	1	0	0	0	0	0	0	0	0	38	0	0	0	0	0	0	0	0
1	1	0	0	87.9968	0	0	0	0	0	1	0	0	0	0	0	0	0	0	0	0	1	0	0	0	1	1	1	1	0	1	1	1	0	1	1	1	1	0	0	11	0	36.4	34.8	0	0	0	0	0
1	1	0	0	59.1733	0	0	0	0	0	1	0	0	0	0	1	1	0	1	0	0	0	0	0	0	1	1	1	1	0	2	0	0	0	0	0	0	0	0	0	15	1	39.6	35.8	0	0	0	0	0
1	1	0	0	53.8032	0	0	0	0	0	0	0	0	0	1	1	0	0	1	0	0	1	0	0	0	0	0	1	0	0	2	0	0	0	0	0	0	0	0	0	10	0	34.6	34.6	0	0	0	0	0
0	1	0	0	66.2558	1	0	0	0	1	1	0	0	0	1	0	1	0	0	0	0	0	1	1	0	1	0	1	1	0	1	1	1	0	1	0	0	0	0	0	60	0	0	0	0	0	0	0	0
0	1	1	0	50.7899	1	1	0	0	0	1	0	0	0	0	0	0	0	1	0	0	0	0	0	0	1	0	1	1	0	2	1	1	0	1	0	1	0	0	0	12	0	0	0	0	0	0	0	0
1	1	0	0	94.2514	0	0	1	0	0	1	1	0	0	1	1	1	0	0	0	0	0	0	0	0	0	0	0	1	0	2	0	0	0	0	0	1	0	0	0	4	0	37.4	35	0	0	0	0	0
1	1	0	0	64.0336	0	0	0	0	0	0	0	0	1	0	0	0	0	1	0	0	0	0	1	0	0	0	1	1	0	2	1	1	0	0	0	0	0	0	0	26	0	32	32	0	0	0	0	0
0	1	0	0	73.2161	1	0	0	0	0	1	1	0	0	0	0	0	0	0	0	0	0	0	0	0	1	0	1	1	0	2	1	1	0	0	0	0	0	0	0	46	0	0	0	0	0	0	0	0
0	1	0	0	80.8604	0	0	0	0	0	1	0	0	1	0	1	0	0	0	0	0	0	0	1	0	0	0	1	1	1	2	1	1	0	0	0	0	0	0	0	50	0	0	0	0	0	0	0	0
1	1	0	0	90.5007	0	1	0	0	0	1	1	0	1	1	0	0	0	0	0	0	0	0	0	0	0	1	1	0	1	2	0	0	0	0	0	0	0	0	0	13	1	38.5	35.5	0	0	0	0	0
1	1	0	0	81.6092	0	0	0	0	0	1	0	0	0	0	0	0	0	0	0	0	0	0	0	0	1	0	1	1	0	1	1	1	0	1	0	1	0	0	0	41	0	35.5	35.5	0	0	0	0	0
0	1	0	0	79.7131	1	1	1	0	0	0	0	0	0	0	0	0	0	0	0	0	0	0	0	0	1	0	1	1	0	1	1	1	0	1	0	1	0	0	0	36	0	0	0	0	0	0	0	0
0	1	0	0	74.6424	1	0	0	0	0	0	0	0	0	1	0	0	0	0	0	0	0	0	0	0	0	0	0	1	0	2	0	0	0	0	0	0	0	0	0	137	0	0	0	0	0	0	0	0
0	1	0	0	34.6336	0	0	0	0	0	1	1	0	0	0	0	1	0	1	0	0	0	0	0	0	0	0	0	1	0	1	1	1	0	1	0	1	0	0	0	28	0	0	0	0	0	0	0	0
0	1	0	0	73.3519	1	0	0	0	1	1	1	0	0	0	0	1	1	0	0	0	0	0	0	0	1	0	1	1	0	1	1	1	0	1	0	1	0	0	0	15	0	0	0	0	0	0	0	0
1	0	0	0	49.4742	1	0	0	0	0	1	0	0	0	0	0	1	0	0	0	0	0	0	0	0	0	0	0	0	0	2	1	0	0	0	0	0	0	0	0	4	0	37.3	36.8	1	0	0	1	1
0	1	0	0	24.9194	1	0	0	0	0	1	1	0	1	0	0	1	1	1	0	1	1	0	0	0	1	0	1	1	0	1	1	1	0	1	0	0	1	0	0	291	1	38.4	38.4	0	0	0	0	0
0	1	0	0	90.0191	0	1	0	1	0	1	0	0	0	0	0	1	0	0	0	0	0	0	0	0	1	0	1	0	0	1	1	1	0	0	1	1	0	0	0	12	0	0	0	0	0	0	0	0
1	1	0	0	27.0377	0	0	0	0	0	0	0	0	0	1	0	0	0	0	0	0	0	0	0	0	0	0	0	0	1	2	0	0	0	0	0	0	0	0	0	6	0	36.8	35.6	0	0	0	0	0
1	1	0	0	18.6532	1	0	0	0	0	1	0	0	0	0	0	0	0	1	0	0	1	0	1	0	1	0	1	1	0	1	1	1	0	1	0	0	0	0	0	11	1	38.8	37.5	0	0	0	0	0
0	1	0	0	91.1665	1	1	1	0	0	0	1	0	0	0	0	0	0	0	0	0	0	0	0	0	1	0	1	0	1	1	1	1	1	0	0	0	0	0	0	17	0	0	0	0	0	0	0	0
1	1	0	0	77.8817	0	1	0	0	0	1	1	0	1	0	0	1	0	0	0	1	0	0	1	0	1	0	1	1	1	2	0	0	0	0	0	0	0	0	0	27	0	37.6	35.6	0	0	0	0	0
1	1	0	0	69.2214	1	0	1	0	1	0	1	1	0	0	1	0	0	0	0	1	0	0	0	0	1	1	1	1	1	1	1	1	0	0	0	1	0	0	0	52	0	36.4	34.3	0	0	0	1	0
1	0	0	0	81.0137	1	0	0	0	0	1	1	0	0	0	1	1	1	0	0	0	0	0	1	0	1	0	1	1	1	1	1	1	0	0	0	0	0	0	0	15	0	37	36	0	0	0	0	0
0	1	0	0	72.2677	0	0	0	0	0	0	1	0	0	0	0	0	0	0	0	0	0	0	0	0	1	0	1	1	1	1	1	1	0	1	0	1	1	0	0	10	0	0	0	0	0	0	0	0
0	1	0	0	68.3721	1	0	0	0	1	1	0	1	1	0	0	0	0	0	0	0	0	0	0	0	1	0	1	1	0	2	1	1	0	0	0	0	1	0	0	35	0	0	0	0	0	0	0	0
1	1	0	0	70.9592	1	0	0	0	0	1	1	0	0	0	0	1	0	1	0	0	0	0	0	0	0	0	0	1	1	1	1	1	0	1	0	0	0	0	0	9	0	37	36	0	0	0	0	0
1	1	0	0	44.539	0	0	0	0	1	0	0	0	0	0	0	0	0	0	0	1	1	0	0	0	0	0	1	1	0	2	1	1	0	0	0	1	0	0	0	38	0	37.5	33.4	0	0	0	1	0
0	1	0	0	83.8316	0	0	0	0	1	1	0	0	1	0	1	0	0	0	0	0	0	0	1	0	1	0	1	0	0	1	1	1	0	1	0	0	0	0	0	40	0	0	0	0	0	0	0	0
0	1	0	0	51.8861	1	0	0	0	0	1	1	0	0	1	1	0	0	1	0	0	0	0	0	0	1	0	1	0	1	1	1	1	0	1	0	1	0	0	0	101	0	0	0	0	0	0	0	0
1	1	0	0	49.2116	1	0	0	0	0	1	0	0	0	0	1	1	0	0	0	0	0	0	0	0	1	0	1	0	1	2	1	0	0	1	0	0	0	0	0	12	0	37.1	35.6	0	0	0	0	0
1	1	0	0	60.399	1	0	0	0	0	1	1	0	0	0	1	0	1	0	0	0	1	0	1	0	1	0	1	1	0	1	1	1	0	1	1	1	0	0	0	20	0	36.8	35.6	0	0	0	0	0
1	1	0	0	57.6791	1	1	0	0	0	1	1	0	1	0	0	0	0	0	0	1	0	0	1	0	0	0	1	1	0	2	0	0	0	0	0	0	0	0	0	15	0	37	34.6	0	0	0	0	0
0	1	0	0	86.1501	1	0	0	0	0	1	0	0	0	0	0	1	0	0	0	0	0	0	0	0	1	0	1	1	0	2	1	0	0	1	0	0	0	0	0	25	0	0	0	0	0	0	0	0
1	1	0	0	42.5388	0	1	0	0	0	1	1	0	1	0	0	0	0	1	0	0	0	0	0	0	0	0	0	1	0	1	1	1	0	0	0	0	0	0	0	4	0	35.8	35.6	0	0	0	0	0
1	1	0	0	28.6034	0	1	0	0	0	1	1	0	0	1	0	0	0	0	0	1	1	0	0	0	1	0	1	0	1	3	1	1	0	1	0	0	0	0	0	14	0	36	35.6	0	0	0	0	0
1	1	0	0	39.2635	0	0	0	0	0	1	0	0	0	0	0	1	0	1	0	0	0	0	0	0	1	0	1	1	0	1	1	1	0	0	1	1	0	0	0	8	0	37.1	35.6	0	0	0	0	0
1	1	0	0	88.6772	0	0	0	0	0	0	0	0	0	0	0	0	0	1	0	0	0	0	1	0	0	1	1	0	1	3	1	1	0	1	0	0	0	0	0	20	0	35.4	35.4	0	0	0	0	0
0	1	0	0	79.2671	0	0	0	0	0	1	1	0	1	0	1	1	0	0	0	0	0	0	0	0	1	0	1	1	1	4	1	0	0	0	0	1	0	0	0	100	0	0	0	0	0	0	0	0
1	1	0	0	41.7105	1	0	0	0	1	1	0	0	1	0	0	0	0	0	0	1	0	0	1	0	1	0	1	1	0	1	1	1	0	0	0	1	0	0	0	21	0	37.1	35.6	0	0	0	0	0
0	1	0	0	65.5161	0	1	0	0	1	1	1	0	0	0	0	0	0	1	0	0	0	0	0	0	1	0	1	1	1	2	1	1	0	0	0	0	0	0	0	30	0	0	0	0	0	0	0	0
1	0	0	0	78.9705	0	0	1	0	0	1	1	0	0	0	1	0	0	0	0	0	0	0	0	0	1	0	1	1	1	1	1	1	1	0	1	1	0	0	0	7	1	38.2	36.2	1	0	0	1	1
1	1	0	0	43.057	1	1	0	0	0	0	1	1	0	0	1	0	0	0	0	0	0	0	0	0	0	0	0	0	0	2	1	0	0	0	0	1	0	0	0	19	1	38.3	36	0	0	0	0	0
1	1	0	0	78.78	1	0	0	1	0	1	0	0	0	0	0	1	0	0	0	0	0	0	0	0	0	0	0	0	0	2	1	0	0	0	0	0	0	0	0	55	1	38.6	36	0	0	0	0	0
1	0	0	0	84.7998	1	1	1	0	0	1	1	0	1	0	0	0	0	0	0	1	1	0	1	0	1	0	1	1	0	1	1	1	0	0	0	1	0	0	0	13	0	36.6	35.6	0	0	0	1	1
1	0	0	0	88.5646	1	0	1	0	0	1	1	1	1	1	0	0	0	0	0	1	1	0	1	0	1	1	1	1	1	1	1	1	0	0	0	1	1	0	0	14	0	36.1	35	1	0	0	0	0
0	1	0	0	43.873	0	0	0	0	0	1	0	0	0	0	0	1	0	0	0	0	0	0	0	0	0	0	0	0	0	2	1	0	0	0	0	0	0	0	0	8	0	0	0	0	0	0	0	0
0	1	0	0	80.8028	0	1	0	0	0	1	0	0	0	1	0	1	1	0	0	0	0	0	0	1	1	0	1	1	1	2	1	1	0	0	0	0	0	0	0	54	0	0	0	0	0	0	0	0
1	1	0	0	51.7873	0	0	0	0	0	1	0	0	0	0	0	0	0	1	0	0	0	0	0	0	1	0	1	1	0	3	0	0	0	0	0	1	0	0	0	39	0	35.5	35.5	0	0	0	0	0
0	1	0	0	39.3054	1	0	0	0	1	1	1	1	0	0	1	1	0	0	0	0	0	0	1	0	1	0	1	1	0	1	1	1	0	0	0	1	0	0	0	42	0	0	0	0	0	0	0	0
0	1	0	0	83.6555	1	0	0	0	1	1	0	0	0	0	0	0	0	1	0	0	0	0	0	0	1	0	1	1	0	1	1	1	0	0	0	1	0	0	0	115	0	0	0	0	0	0	0	0
0	1	0	0	45.6851	1	0	0	0	0	0	0	0	0	1	0	0	0	0	0	0	0	0	0	0	1	0	1	0	0	2	1	0	0	0	0	0	0	0	0	10	0	0	0	0	0	0	0	0
1	1	0	0	51.8945	1	0	0	0	0	0	0	0	0	0	0	0	0	1	0	1	1	0	1	0	0	1	1	0	1	1	1	1	0	0	0	0	0	0	0	15	0	37	35.3	0	0	0	0	0
0	1	0	0	61.7513	0	1	0	0	0	0	1	0	1	0	0	0	0	0	0	0	0	0	0	0	0	0	0	0	1	2	1	0	0	0	0	0	0	0	0	55	0	0	0	0	0	0	0	0
1	1	0	0	21.5849	1	0	0	0	0	1	0	0	0	0	0	1	0	0	0	0	0	0	0	0	1	1	1	1	0	1	1	1	0	0	0	1	0	0	0	4	0	37.5	36.5	0	0	0	1	0
0	1	0	0	59.2846	1	1	0	0	0	1	1	1	1	0	1	1	0	0	0	0	0	0	1	0	1	0	1	0	1	1	1	1	0	0	1	1	0	0	0	51	0	0	0	0	0	0	0	0
1	1	0	0	45.9167	1	0	0	0	0	0	0	0	0	0	0	0	0	1	0	0	0	0	1	0	1	1	1	1	0	1	1	1	0	0	0	0	0	0	0	14	0	35.5	35.5	0	0	0	0	0
0	1	0	0	83.8058	0	1	0	0	1	1	1	1	0	0	1	0	0	0	0	0	0	0	0	0	1	0	1	1	0	1	1	1	0	0	0	1	0	0	0	40	0	0	0	0	0	0	0	0
0	1	0	0	55.4887	0	0	0	0	0	1	0	0	0	0	0	0	0	1	0	0	0	0	0	0	1	0	1	1	1	2	1	1	0	0	0	1	0	0	0	45	0	0	0	0	0	0	0	0
1	1	0	0	76.7695	0	0	0	0	0	1	0	0	0	0	1	1	1	0	0	1	0	0	0	1	1	0	1	1	1	1	1	1	1	0	0	0	0	0	0	2	0	37.7	35.6	1	0	0	1	0
1	1	0	0	55.2541	0	1	0	0	0	0	0	0	0	0	0	0	0	1	0	0	0	0	0	0	1	0	1	0	0	2	1	1	0	0	0	0	0	0	0	20	1	38.2	35	0	0	0	0	0
0	1	0	0	74.4849	0	0	0	0	0	1	0	0	0	0	0	0	0	0	0	0	0	0	0	0	1	0	1	0	0	1	1	1	0	0	0	1	0	0	0	73	0	0	0	0	0	0	0	0
0	1	0	0	31.8278	1	0	0	0	0	0	0	0	0	0	0	1	0	0	0	0	0	0	0	0	0	0	0	1	0	2	1	1	0	0	0	0	0	0	0	37	0	0	0	0	0	0	0	0
1	1	0	0	71.4365	0	1	1	0	0	1	0	0	0	0	1	0	0	0	0	0	0	0	0	0	1	0	1	1	1	2	1	1	0	0	0	1	0	0	0	52	0	37.1	35.6	0	0	0	0	0
1	1	0	0	82.3704	0	1	0	0	0	0	0	0	0	0	0	0	0	0	0	0	0	0	0	0	0	0	0	1	0	2	1	0	0	0	0	1	0	0	0	19	0	37	35.7	0	0	0	0	0
1	1	0	0	34.257	0	0	0	1	0	0	0	0	0	0	0	0	0	0	0	0	0	0	0	0	1	0	1	0	0	2	0	1	0	0	0	0	0	0	0	4	0	37.8	36	1	0	0	1	1
0	1	0	0	61.2662	1	1	0	0	0	1	0	0	0	0	1	1	0	0	0	0	0	0	0	0	1	0	1	0	0	1	1	1	0	0	0	1	0	0	0	32	0	0	0	0	0	0	0	0
0	1	0	0	86.4779	1	0	0	0	0	1	0	0	0	0	0	1	0	0	0	0	0	0	1	0	1	0	1	1	0	2	1	0	0	0	0	1	0	0	0	51	0	0	0	0	0	0	0	0
0	1	0	0	32.6225	0	0	0	0	0	1	1	1	0	0	0	0	0	1	0	0	0	0	0	0	1	0	1	0	0	1	1	1	0	0	0	1	1	0	0	46	0	0	0	0	0	0	0	0
1	1	0	0	48.5324	0	0	0	0	0	1	1	1	0	1	0	0	0	1	0	1	0	0	0	0	1	0	1	0	0	1	1	1	0	0	0	1	0	0	0	9	1	40.4	37.6	0	0	0	0	0
1	1	0	0	30.6824	0	0	0	0	0	1	1	1	0	1	0	0	1	1	0	0	0	0	0	0	0	0	0	1	0	1	1	1	0	0	0	1	1	0	0	11	0	37.1	35.6	0	0	0	0	0
0	1	1	0	38.4175	1	0	0	0	0	1	0	0	0	0	0	0	0	0	0	0	0	1	0	1	1	0	1	1	0	1	1	1	0	0	0	1	0	0	0	30	0	0	0	0	0	0	0	0
0	1	0	0	44.5126	1	0	0	0	1	1	1	0	0	1	0	0	0	0	0	0	0	0	0	0	1	0	1	1	0	1	1	1	1	0	0	1	0	0	0	62	0	0	0	0	0	0	0	0
0	1	0	0	94.8853	1	0	0	0	1	1	1	0	0	0	0	1	0	0	0	0	0	0	0	0	1	0	1	1	0	1	1	1	0	0	1	1	0	0	0	30	0	0	0	0	0	0	0	0
0	1	0	0	54.4599	1	0	0	0	0	0	0	0	0	0	0	1	0	0	0	0	0	0	0	0	0	0	0	0	1	2	1	1	0	0	0	0	0	0	0	35	0	0	0	0	0	0	0	0
1	1	0	0	84.9545	1	0	0	0	0	0	0	0	0	0	0	0	0	0	0	0	0	0	0	0	0	1	1	0	0	2	1	0	0	0	0	0	0	0	0	14	1	38.1	34.6	0	0	0	0	0
1	1	0	0	74.6639	0	0	0	0	0	1	0	0	0	1	0	1	0	0	0	1	0	0	0	0	1	1	1	1	0	1	1	1	1	0	0	1	0	0	0	5	1	39.7	36.3	0	0	0	1	0
1	1	0	1	57.5721	1	1	0	0	0	0	0	0	0	0	1	0	0	0	0	0	0	0	0	0	0	0	0	1	1	1	1	1	1	0	1	1	0	0	0	79	0	37.5	36.4	0	0	0	1	0
1	1	0	0	90.1285	0	1	0	0	0	1	0	0	0	0	1	1	0	0	0	0	0	0	0	0	1	0	1	0	0	1	1	1	0	0	0	1	0	0	0	4	1	38	36.2	0	0	0	1	0
1	1	0	0	85.134	1	1	0	0	0	1	1	1	0	0	1	1	1	0	0	0	0	0	0	0	1	0	1	1	1	1	1	1	1	0	0	0	0	0	0	2	0	36.9	35.4	0	0	0	1	0
0	1	0	0	68.2405	0	0	0	0	1	1	0	0	1	0	0	0	1	0	0	0	0	0	0	0	1	0	1	1	0	1	1	1	0	0	0	1	0	0	0	32	0	0	0	0	0	0	0	0
0	1	0	0	81.6123	1	0	0	0	0	0	0	0	0	0	1	1	0	0	0	0	0	0	0	0	1	0	1	1	0	2	0	0	1	0	0	0	0	0	0	40	0	0	0	0	0	0	0	0
0	1	0	0	80.3579	0	1	0	1	1	1	1	1	0	1	1	0	0	0	0	0	0	0	0	0	1	0	1	1	0	1	1	1	0	1	0	1	0	0	0	71	0	0	0	0	0	0	0	0
1	1	0	0	66.2866	1	1	0	0	0	1	0	0	0	0	0	0	0	0	0	1	0	0	0	0	0	0	1	1	0	2	1	0	0	0	0	0	0	0	0	9	1	38	36.6	0	0	0	1	0
1	1	0	0	32.8046	0	1	0	0	0	1	0	0	0	0	0	0	0	0	0	0	0	0	0	0	0	0	0	1	0	1	1	1	0	0	0	0	0	0	0	23	0	37.1	35.6	0	0	0	0	0
1	1	0	0	43.722	0	0	0	0	0	0	0	0	0	0	0	0	0	0	0	0	0	0	0	0	0	0	0	0	1	2	1	1	0	0	0	0	0	0	0	6	0	37.1	35.6	0	0	0	0	0
0	1	0	0	62.4247	0	0	0	0	0	0	0	0	0	0	0	0	0	1	0	0	0	0	0	0	0	0	0	0	0	2	1	0	0	0	0	0	0	0	0	15	0	0	0	0	0	0	0	0
0	1	0	0	38.2443	1	0	0	1	0	0	0	0	1	0	0	0	0	0	0	0	0	0	0	0	1	0	1	1	0	1	1	1	1	1	0	0	0	0	0	27	0	0	0	0	0	0	0	0
1	0	0	0	70.3667	1	1	0	0	0	0	0	0	0	0	0	0	0	0	0	0	0	0	0	0	0	0	0	0	0	2	0	1	1	0	0	0	0	0	0	14	0	37.8	36.2	1	0	0	0	0
0	1	0	0	43.0454	0	0	0	0	0	0	0	0	0	0	0	0	0	1	0	0	0	0	0	0	0	0	0	1	0	2	0	0	0	0	0	0	0	0	0	173	0	0	0	0	0	0	0	0
0	1	0	0	57.4923	1	0	0	0	0	0	0	0	0	0	0	0	0	0	0	0	0	0	0	0	0	0	0	1	1	2	1	0	0	0	0	0	0	0	0	61	0	0	0	0	0	0	0	0
1	0	0	0	74.6196	0	1	0	0	0	1	0	0	0	1	1	0	0	0	0	0	0	0	0	0	0	0	0	1	0	1	1	1	1	1	1	1	0	0	0	9	0	37.6	35.8	0	0	0	0	0
0	1	0	0	89.6322	0	0	0	1	0	1	0	0	0	0	0	0	0	0	0	0	0	0	0	0	0	0	0	1	1	2	0	0	0	0	0	0	0	0	0	123	0	0	0	0	0	0	0	0
0	1	0	0	79.2628	0	1	1	0	0	1	0	0	0	1	1	0	0	0	0	0	0	0	0	0	1	0	1	1	0	1	1	1	1	0	0	1	0	0	0	31	0	0	0	0	0	0	0	0
1	1	0	0	71.8304	0	0	0	0	1	1	0	0	0	1	0	1	0	1	0	0	0	0	0	0	1	0	1	1	0	1	1	1	0	1	0	1	0	0	0	25	0	37.1	35.6	0	0	0	0	0
0	1	0	0	76.9855	1	1	0	0	0	1	0	0	0	0	1	0	0	1	0	0	0	0	0	0	1	0	1	1	0	1	1	1	0	1	0	0	0	0	0	74	0	0	0	0	0	0	0	0
1	1	0	0	56.1884	1	1	0	0	0	1	1	0	1	0	0	0	0	1	0	0	0	0	0	0	0	0	0	1	0	2	1	0	0	0	0	0	0	0	0	30	0	33.8	33.8	0	0	0	0	0
0	1	0	0	69.7118	1	0	0	0	0	1	0	0	0	0	0	0	0	0	0	0	0	0	0	0	0	0	0	1	0	2	0	0	0	0	0	0	0	0	0	31	0	0	0	0	0	0	0	0
1	1	0	0	25.3589	0	0	0	0	0	1	1	0	0	1	0	1	1	0	0	0	1	0	1	0	1	0	1	0	0	1	1	1	0	1	0	1	1	0	0	5	0	37.9	36.3	0	0	0	0	0
0	1	0	0	57.6067	0	1	0	0	1	1	1	0	1	1	0	1	0	1	0	0	0	0	0	0	1	0	1	1	0	1	1	1	0	1	1	1	0	0	0	21	0	0	0	0	0	0	0	0
1	1	0	0	73.4297	1	1	0	0	0	1	1	0	1	0	1	1	0	0	0	0	0	0	0	0	0	0	0	1	0	2	0	0	0	0	0	0	0	0	0	39	0	37.1	35.6	0	0	0	0	0
0	1	0	0	24.5842	1	0	0	0	1	1	1	0	1	1	1	0	0	0	0	0	0	0	1	0	1	0	1	0	1	1	1	1	0	1	0	1	0	0	0	62	0	0	0	0	0	0	0	0
0	1	0	0	86.4459	1	0	0	1	0	0	1	0	0	0	0	0	0	0	0	0	0	0	0	0	0	0	0	0	0	2	0	0	0	0	0	0	0	0	0	80	0	0	0	0	0	0	0	0
1	0	0	0	72.4808	1	1	1	0	0	0	1	1	0	0	1	1	0	0	0	1	0	0	0	0	1	0	1	0	0	1	1	1	1	0	1	1	1	0	0	4	0	36	35.4	0	0	0	1	1
1	0	0	0	25.7941	1	1	0	0	0	0	0	0	0	0	0	0	0	0	0	0	0	0	0	0	0	0	0	1	0	2	1	0	1	0	0	0	0	0	0	9	1	39.8	35.2	0	0	0	0	0
0	1	0	0	67.8518	1	1	0	0	0	1	1	0	0	0	0	1	0	0	0	0	0	0	0	0	1	0	1	1	0	1	1	1	0	1	0	0	0	0	0	29	0	0	0	0	0	0	0	0
1	1	0	0	50.3188	1	0	0	0	0	0	0	0	1	0	0	0	0	0	0	0	0	0	1	0	0	0	1	1	0	2	1	0	0	1	0	1	0	0	0	27	0	37.1	35.6	0	0	0	0	0
0	1	0	0	71.3273	0	1	0	0	1	0	1	1	0	1	0	0	0	1	0	0	0	0	1	0	1	0	1	1	0	1	1	1	0	1	0	1	0	0	0	76	0	0	0	0	0	0	0	0
1	1	0	0	87.2046	1	1	0	1	0	1	0	0	0	0	0	1	0	0	0	0	0	0	0	0	1	0	1	0	0	1	1	1	1	1	0	1	0	0	0	6	0	37.1	35.6	0	0	0	0	0
1	1	0	0	85.661	1	1	1	0	0	0	0	0	0	0	0	0	0	0	0	0	0	0	0	0	1	0	1	0	0	1	1	1	0	1	0	1	0	0	0	15	0	37.1	35.6	0	0	0	0	0
1	1	0	0	36.0147	0	0	0	0	0	1	1	0	0	0	0	0	0	0	0	1	1	0	1	0	0	0	1	0	1	1	1	1	0	0	0	1	1	0	0	4	0	36	35.6	0	0	0	0	0
0	1	0	0	66.0843	0	0	0	0	0	0	0	0	0	1	0	0	0	0	0	0	0	0	0	0	0	0	0	1	1	2	0	0	0	0	0	0	0	0	0	65	0	0	0	0	0	0	0	0
1	1	0	0	81.6092	1	0	0	0	0	1	0	0	0	1	1	0	0	1	0	0	0	0	0	0	0	0	0	1	0	2	1	0	0	0	0	0	0	0	0	20	1	38	36.4	0	0	0	1	0
1	1	0	0	54.3013	1	0	0	0	0	0	0	0	0	0	0	1	0	1	0	0	0	0	1	0	1	0	1	0	1	2	1	0	0	0	0	0	0	0	0	42	0	35	35	0	0	0	0	0
1	1	0	0	78.8089	0	1	0	0	0	1	1	0	0	0	1	0	0	0	0	0	0	0	0	0	0	0	0	1	0	2	1	1	0	0	0	0	0	0	0	15	1	38.3	36	0	0	0	1	0
1	1	0	0	62.5939	1	0	0	1	0	1	1	0	1	0	1	0	0	0	0	0	0	0	0	0	1	0	1	0	0	1	1	1	0	1	0	0	1	0	0	16	0	36.3	35.6	0	0	0	0	0
1	1	1	0	50.2082	1	0	0	0	0	1	0	NA	0	0	0	0	0	0	0	0	0	0	0	1	1	0	1	0	0	2	1	1	0	1	0	0	0	0	0	22	1	38.9	35.6	0	0	0	1	0
1	1	0	0	67.7641	1	0	0	0	1	1	0	0	1	0	1	0	0	0	0	0	0	0	1	0	1	0	1	1	0	1	1	1	0	1	0	1	0	0	0	14	0	37.2	35.6	0	0	0	0	0
0	1	0	0	65.9158	0	1	0	0	0	0	0	0	0	0	1	0	0	0	0	0	0	0	0	0	0	0	0	1	0	2	0	0	0	0	0	0	0	0	0	60	0	0	0	0	0	0	0	0
0	1	0	0	48.9482	1	0	0	0	0	0	0	0	0	1	1	0	0	1	0	0	0	0	0	0	0	0	0	0	0	2	0	0	0	0	0	0	0	0	0	28	0	0	0	0	0	0	0	0
1	1	0	0	64.8668	1	0	0	0	1	1	0	0	1	0	0	0	0	0	0	1	0	0	1	0	0	0	1	0	0	3	1	0	0	0	0	0	0	0	0	16	0	35.6	35.6	0	0	0	0	0
0	1	0	0	64.5853	1	0	0	0	0	0	0	0	0	0	0	1	0	0	0	0	0	0	0	0	0	0	0	1	0	2	0	0	0	0	0	0	0	0	0	70	0	0	0	0	0	0	0	0
1	1	0	0	53.3673	1	0	0	0	0	0	0	0	0	0	1	0	0	0	0	0	0	0	0	0	0	0	0	0	0	4	0	1	0	0	0	0	0	0	0	10	0	37	36	0	0	0	0	0
1	1	0	0	91.2108	0	1	0	1	1	1	0	0	0	0	0	1	0	0	0	1	0	0	0	0	1	0	1	1	0	1	1	1	0	1	0	1	0	0	0	5	0	36.6	35.7	0	0	0	0	0
1	1	0	0	62.424	0	0	0	0	1	1	0	0	0	0	0	1	0	1	0	0	0	0	0	0	1	0	1	0	1	1	1	1	0	0	0	1	0	0	0	6	1	39.2	36.5	0	0	0	0	0
0	1	0	0	52.6428	0	0	0	0	1	0	0	0	0	0	0	1	0	0	0	0	0	0	0	0	1	0	1	1	1	1	1	1	0	0	0	1	0	0	0	6	0	0	0	0	0	0	0	0
0	1	0	0	57.1451	1	0	0	0	0	1	0	0	0	0	1	1	0	1	0	0	0	0	1	0	1	0	1	1	1	1	1	1	0	0	0	0	0	0	0	67	0	0	0	0	0	0	0	0
1	1	0	0	61.6871	0	1	0	0	0	1	1	0	0	0	1	1	0	0	0	0	0	0	0	0	1	0	1	1	1	2	1	0	0	0	0	0	0	0	0	4	0	37.3	36.3	0	0	0	1	0
1	1	0	0	50.1961	1	0	0	0	0	1	0	0	0	0	0	0	0	0	0	0	0	0	1	0	1	1	1	1	1	4	0	0	0	0	0	1	0	0	0	45	1	38.8	32.6	0	0	0	0	0
0	1	0	0	98.7835	1	1	0	1	0	1	0	0	0	0	0	1	0	0	0	0	0	0	0	0	1	0	1	0	0	1	1	1	0	0	0	1	0	0	0	32	0	0	0	0	0	0	0	0
0	1	0	0	60.0866	0	0	0	0	0	1	0	0	0	0	0	0	0	1	0	0	0	0	1	0	0	0	1	0	1	2	1	1	0	0	0	0	0	0	0	33	0	0	0	0	0	0	0	0
1	1	0	0	39.8641	1	0	0	0	0	1	0	0	0	1	0	1	0	1	0	0	0	0	1	0	0	1	1	0	0	2	0	0	0	0	0	0	0	0	0	22	1	40.8	36.4	0	0	0	0	0
1	1	0	0	19.4014	1	0	0	0	0	1	0	0	0	0	0	0	1	1	0	0	0	0	0	0	1	1	1	0	0	1	1	1	1	0	0	1	0	0	0	23	0	37.4	36.4	0	0	0	0	0
1	1	0	0	81.4154	0	1	0	1	0	0	1	1	0	1	1	0	0	0	0	0	0	0	0	0	1	0	1	1	0	2	0	0	0	0	0	0	0	0	0	37	0	36.4	36	0	0	0	0	0
1	1	0	0	87.6881	0	1	0	0	0	1	0	0	0	0	0	0	0	0	0	1	1	0	1	0	1	1	1	1	0	2	1	0	0	0	0	0	0	0	0	45	0	36.6	34.4	0	0	0	0	0
0	1	0	0	68.3996	1	0	0	0	0	1	1	0	0	0	1	1	0	1	0	0	0	0	0	0	1	0	1	1	0	1	1	1	0	0	1	1	0	0	0	21	0	0	0	0	0	0	0	0
0	1	0	0	28.2059	1	0	0	0	0	1	0	0	0	0	1	0	0	1	0	0	0	0	0	0	1	0	1	1	0	1	1	1	0	0	0	0	0	0	0	128	0	0	0	0	0	0	0	0
1	1	0	0	31.131	1	0	0	0	0	1	1	1	1	0	0	1	0	0	0	0	0	0	1	0	0	0	1	0	0	1	1	1	0	0	0	0	0	0	0	10	1	38.4	36.6	0	0	0	1	1
0	1	0	0	71.9081	0	0	0	0	1	1	0	0	0	0	1	0	0	0	0	0	0	0	1	0	1	0	1	0	0	1	1	1	0	0	0	1	0	0	0	90	0	0	0	0	0	0	0	0
1	0	0	0	64.7261	1	0	1	0	0	0	0	0	0	0	0	0	1	0	0	0	0	0	0	0	0	0	0	1	0	1	1	1	0	0	0	0	0	0	0	3	0	37.4	36.2	1	0	0	1	1
1	1	0	0	73.6071	1	0	1	0	0	0	0	0	0	0	0	0	0	0	0	0	0	0	0	0	0	0	0	1	1	1	1	1	1	0	0	0	0	0	0	4	0	37.8	33.8	0	0	0	1	1
1	1	0	0	64.0102	1	0	0	0	1	1	1	0	0	1	1	0	0	0	0	0	1	0	0	0	1	0	1	1	0	1	1	1	1	0	0	0	0	0	0	4	0	36.4	35.4	0	0	0	0	0
0	1	0	0	49.7292	0	0	0	0	0	1	1	1	0	0	0	0	0	0	0	0	0	0	0	0	1	0	1	0	1	1	1	1	0	0	1	1	0	0	0	30	0	0	0	0	0	0	0	0
1	1	0	0	48.677	0	0	0	0	0	1	1	0	1	0	0	0	0	1	0	1	1	0	1	0	1	0	1	1	0	1	1	1	0	0	0	1	1	0	0	5	0	37.1	35.6	0	0	0	0	0
0	1	1	0	34.6034	1	0	0	0	0	1	0	0	0	1	0	1	1	0	0	0	0	0	1	0	0	0	1	1	0	2	0	0	0	0	0	0	0	0	0	30	0	0	0	0	0	0	0	0
0	1	0	0	31.5037	1	0	0	0	0	1	0	0	0	0	0	1	0	1	0	0	0	0	0	0	1	0	1	1	0	1	1	1	0	0	0	1	0	0	0	49	0	0	0	0	0	0	0	0
1	1	0	0	79.1146	1	0	0	0	0	1	1	1	0	0	1	1	0	0	0	0	0	0	1	0	1	0	1	0	1	2	1	0	0	0	0	0	0	0	0	14	0	37.2	36.1	0	0	0	0	0
1	1	0	0	24.9962	1	0	0	0	0	1	0	0	0	0	0	0	1	1	0	1	1	0	1	0	0	1	1	1	1	2	1	0	0	0	0	0	0	0	0	80	0	35	35	0	0	0	0	0
1	1	0	0	56.5508	1	0	0	0	0	1	1	1	0	0	0	0	0	0	0	0	1	0	0	0	1	0	1	1	0	2	0	0	0	0	0	0	0	0	0	9	1	38.2	36.2	0	0	0	0	0
1	1	0	0	80.5322	1	0	0	1	1	1	0	0	0	0	1	1	0	0	0	0	0	0	0	0	0	0	0	0	1	2	1	1	0	0	0	0	0	0	0	24	1	39.5	36	0	0	0	0	0
0	1	0	0	53.174	0	0	0	0	0	1	1	0	1	0	0	0	0	0	0	0	0	0	0	0	1	0	1	1	1	1	1	1	1	0	0	1	0	0	0	23	0	0	0	0	0	0	0	0
0	1	0	0	32.1782	1	0	0	0	0	1	1	0	0	0	0	0	0	1	0	0	0	0	0	0	0	0	0	1	0	2	1	1	0	0	0	0	0	0	0	60	0	0	0	0	0	0	0	0
0	1	0	0	27.8032	1	0	0	0	0	1	0	0	0	0	0	0	0	0	0	0	0	0	0	0	1	0	1	1	1	1	1	1	0	0	0	1	0	0	0	32	0	0	0	0	0	0	0	0
0	1	0	0	82.158	0	1	0	0	1	1	1	0	0	0	0	0	0	0	0	0	0	0	1	0	1	0	1	1	0	2	1	1	0	0	0	1	0	0	0	115	0	0	0	0	0	0	0	0
0	1	0	0	38.9452	0	1	0	0	0	1	0	0	0	0	0	0	0	1	0	0	0	0	1	0	0	0	1	1	0	1	1	1	0	0	0	1	0	0	0	38	0	0	0	0	0	0	0	0
0	1	0	0	79.3266	1	0	0	0	0	1	0	0	0	0	1	1	0	1	0	0	0	0	0	0	1	0	1	1	0	1	1	1	0	0	1	1	0	0	0	65	0	0	0	0	0	0	0	0
0	1	0	0	69.4792	1	0	0	0	0	0	0	0	0	0	0	0	0	1	0	0	0	0	0	0	0	0	0	1	0	2	0	0	0	0	0	0	0	0	0	50	0	0	0	0	0	0	0	0
1	1	0	0	71.0275	1	0	0	0	0	1	0	0	0	0	1	0	0	0	0	0	0	0	1	0	1	1	1	1	0	2	0	0	0	0	0	0	0	0	0	21	0	36.7	35.5	0	0	0	0	0
1	1	0	0	28.8954	0	1	0	0	0	1	1	0	1	0	0	0	0	0	0	0	0	0	1	0	1	0	1	1	0	3	1	1	0	0	0	0	0	0	0	54	0	31.6	31.6	0	0	0	0	0
0	1	0	0	83.3582	1	1	0	0	1	1	0	0	0	1	0	1	0	0	0	0	0	0	0	0	1	0	1	0	0	1	1	1	0	0	0	0	0	0	0	43	0	0	0	0	0	0	0	0
0	1	0	0	89.8454	1	1	0	0	0	1	0	0	0	0	0	0	0	0	0	0	0	0	1	1	0	0	1	1	0	2	0	0	0	0	0	0	0	0	0	57	0	0	0	0	0	0	0	0
0	1	0	0	102.179	0	0	0	0	0	1	0	0	0	0	0	0	0	0	0	0	0	0	0	0	1	0	1	1	0	1	1	1	0	0	0	1	0	0	0	31	0	0	0	0	0	0	0	0
0	1	0	0	47.2384	1	0	0	0	0	1	0	0	0	0	1	1	0	0	0	0	0	0	1	0	1	0	1	1	1	2	1	0	0	0	0	0	0	0	0	62	0	0	0	0	0	0	0	0
1	1	0	0	73.3795	1	0	0	0	0	0	0	0	0	0	0	0	0	0	0	1	0	0	0	0	0	0	1	1	1	1	1	1	0	0	1	0	0	0	0	16	0	37.8	36.6	1	0	0	1	1
1	1	0	0	78.0495	1	1	0	1	0	1	1	0	1	0	0	1	0	0	0	1	0	0	1	0	0	0	1	0	0	1	1	1	0	0	0	0	0	0	0	55	0	36.8	36	0	0	0	0	0
1	1	0	0	81.4824	0	0	0	1	1	1	0	0	0	0	0	1	0	0	0	0	1	0	0	1	1	0	1	0	0	1	1	1	0	0	1	1	0	0	0	10	1	38.1	36.6	0	0	0	1	0
0	1	0	0	88.5441	1	0	1	0	0	1	0	0	0	0	0	0	0	0	0	0	0	0	0	0	1	0	1	1	0	1	1	1	0	0	0	0	0	0	0	30	0	0	0	0	0	0	0	0
1	1	0	0	82.2898	1	1	0	0	0	0	1	0	0	0	0	0	0	0	0	0	0	0	0	0	0	0	0	0	0	1	1	1	0	0	0	1	1	0	0	13	0	36.8	34.2	0	0	0	0	0
0	1	0	0	82.5764	1	0	0	0	0	1	0	0	0	0	0	0	0	0	0	0	0	0	0	0	1	0	1	1	0	2	1	1	0	0	0	1	0	0	0	22	0	0	0	0	0	0	0	0
0	1	0	0	65.1649	1	0	0	0	0	1	0	0	0	0	1	0	0	1	0	0	0	0	0	0	0	0	0	0	0	2	0	0	0	0	0	0	0	0	0	63	0	0	0	0	0	0	0	0
0	1	0	0	82.0356	0	0	0	1	0	1	0	0	0	0	0	0	0	0	0	0	0	0	0	1	1	0	1	0	0	2	1	1	0	0	0	0	0	0	0	71	0	0	0	0	0	0	0	0
0	1	0	0	47.1099	0	1	0	0	0	1	0	0	0	0	0	0	0	0	0	0	0	1	1	1	0	0	1	1	1	2	1	1	0	0	0	0	0	0	0	131	0	0	0	0	0	0	0	0
1	1	0	0	79.3743	1	0	0	0	0	1	0	0	1	0	0	1	0	0	0	0	1	1	0	1	1	1	1	0	0	2	0	1	1	0	0	0	0	0	0	15	1	38.2	36.4	0	0	0	0	0
1	1	0	0	83.827	1	0	1	0	0	1	0	0	0	0	1	0	0	0	0	1	0	0	0	0	0	1	1	1	0	3	1	1	0	0	0	1	0	0	0	20	0	37.1	35.6	0	0	0	0	0
1	1	0	0	81.7456	1	1	0	1	0	1	1	1	1	0	0	0	0	0	0	0	0	0	0	0	1	0	1	0	0	1	1	1	0	0	0	1	0	0	0	3	1	39	36.5	0	0	0	0	0
1	1	0	0	80.4985	1	0	1	0	0	1	1	1	0	0	0	1	1	0	0	0	0	0	1	0	1	0	1	1	0	1	1	1	1	0	1	0	0	0	0	12	0	37.4	36	0	0	0	1	0
0	1	0	0	88.8031	1	0	1	0	0	1	0	0	0	1	0	0	0	0	0	0	0	0	0	0	1	0	1	1	1	1	1	1	1	0	0	1	1	0	0	102	0	0	0	0	0	0	0	0
0	1	0	0	21.0751	1	0	0	0	0	1	1	0	1	1	0	0	0	1	0	0	0	0	1	0	1	0	1	0	1	1	1	1	0	0	0	1	1	0	0	16	0	0	0	0	0	0	0	0
1	1	0	0	39.8135	1	0	0	0	0	1	0	0	1	0	1	0	0	0	0	0	0	0	1	0	1	0	1	1	1	1	1	1	0	0	0	0	0	0	0	6	1	38.4	37.4	0	0	0	0	0
0	1	0	0	62.8032	0	0	0	0	0	1	0	0	0	0	1	1	0	0	0	0	0	0	0	0	1	0	1	1	0	1	1	1	0	0	0	0	0	0	0	50	0	0	0	0	0	0	0	0
1	1	0	0	77.0928	1	0	0	0	0	0	0	0	0	0	0	0	0	1	0	1	0	0	1	0	1	1	1	1	0	2	1	0	0	0	0	1	0	0	0	34	0	34.9	33.4	0	0	0	0	0
1	1	0	0	57.7562	0	0	0	0	0	0	0	0	0	0	0	0	1	0	0	0	1	0	1	0	1	0	1	0	0	2	0	0	0	0	0	0	0	0	0	10	1	38.9	35.2	0	0	0	0	0
1	1	0	0	27.9885	1	0	0	0	0	1	0	0	0	1	0	0	0	1	0	0	0	0	0	0	1	1	1	1	0	2	0	0	0	0	0	1	0	0	0	18	1	40.2	37	0	0	0	0	0
1	1	0	0	87.3194	1	0	0	1	0	1	0	1	0	0	0	1	0	0	0	0	0	0	0	0	0	0	0	0	1	2	0	0	0	0	0	0	0	0	0	29	0	37	34	0	0	0	0	0
0	1	0	0	88.9385	1	0	0	0	0	1	0	0	0	0	0	1	0	0	0	0	0	0	0	0	0	0	0	1	0	2	0	0	0	0	0	0	0	0	0	125	0	0	0	0	0	0	0	0
0	1	0	0	87.1552	1	0	1	0	0	0	1	1	0	0	0	0	0	0	0	0	0	0	0	0	1	0	1	0	1	1	1	1	0	0	0	1	1	0	0	35	0	0	0	0	0	0	0	0
1	0	0	0	39.6358	1	0	0	0	0	0	0	0	1	0	0	0	0	0	0	1	0	0	0	0	0	0	1	1	0	2	0	0	0	0	0	0	0	0	0	10	0	36.6	36.4	0	0	0	0	0
1	1	0	0	72.7766	1	0	0	0	0	1	0	0	0	0	1	0	0	0	0	0	0	0	0	0	0	1	1	0	1	1	1	1	0	0	0	0	0	0	0	20	1	41.4	36.4	0	0	0	0	0
1	1	0	0	72.6713	1	1	0	1	0	0	0	0	1	0	0	0	0	0	0	0	0	0	0	0	0	0	0	1	0	2	0	0	1	0	0	0	0	0	0	25	1	38.4	36.8	0	0	0	0	0
0	1	0	0	55.741	1	0	0	0	1	1	1	0	0	0	0	0	0	1	0	0	0	0	0	0	1	0	1	0	0	1	1	1	0	0	0	1	0	0	0	60	0	0	0	0	0	0	0	0
1	1	0	0	66.6906	0	0	0	0	0	0	0	0	0	0	0	0	0	0	0	0	0	0	0	0	1	0	1	1	0	1	1	1	0	0	0	1	0	0	0	3	1	38.4	35.2	0	0	0	1	1
1	1	0	0	78.3729	0	0	0	0	0	1	1	1	0	1	1	1	0	0	0	0	0	0	0	0	1	0	1	0	0	2	0	1	0	0	0	0	0	0	0	9	0	36.7	35.5	0	0	0	0	0
0	1	0	0	63.2935	1	1	0	0	0	1	0	0	0	0	0	0	0	0	0	0	0	0	0	0	1	0	1	1	1	1	1	1	1	0	0	0	0	0	0	53	0	0	0	0	0	0	0	0
0	1	0	0	58.7009	1	0	0	0	0	1	0	0	0	0	0	0	0	1	0	0	0	0	0	0	0	0	0	0	1	2	0	0	0	0	0	0	0	0	0	16	0	0	0	0	0	0	0	0
1	1	0	0	88.943	1	1	0	1	1	1	0	0	0	1	0	0	0	0	0	0	0	0	0	0	0	1	1	0	1	2	1	0	1	0	0	0	0	0	0	48	0	35.7	35	0	0	0	0	0
0	1	0	0	51.0557	1	0	1	1	0	1	1	0	0	0	1	0	0	0	0	0	0	0	1	0	1	0	1	1	1	1	1	1	0	0	0	1	0	0	0	31	0	0	0	0	0	0	0	0
0	1	0	0	73.6688	1	1	0	1	0	1	0	0	0	0	1	1	0	0	0	0	0	0	0	0	1	0	1	0	0	2	0	1	0	0	0	0	0	0	0	70	0	0	0	0	0	0	0	0
1	1	0	0	92.4529	1	0	0	1	0	1	1	1	0	0	0	1	0	0	0	0	0	0	0	0	1	0	1	0	0	2	0	0	0	0	0	0	0	0	0	4	0	36.7	36.4	0	0	0	0	0
0	1	0	0	86.1469	0	1	0	0	0	0	0	0	0	0	1	0	0	1	0	0	0	0	0	0	1	0	1	1	0	2	0	0	0	0	0	0	0	0	0	53	0	0	0	0	0	0	0	0
0	1	0	0	69.4902	1	0	0	1	0	1	0	0	0	0	1	1	0	1	0	0	0	0	0	0	1	0	1	1	1	1	1	1	0	0	0	0	0	0	0	52	0	0	0	0	0	0	0	0
1	1	0	0	72.7122	1	0	0	1	0	0	1	1	0	0	0	0	0	0	0	0	0	0	0	0	1	0	1	1	0	1	1	1	1	0	0	0	0	0	0	13	0	35	34.9	0	0	0	0	0
1	1	0	0	48.1162	1	0	0	0	1	1	0	0	1	0	0	0	0	0	0	1	1	0	1	0	1	0	1	0	0	1	1	1	0	0	0	0	0	0	0	3	0	36.4	35.2	0	0	0	1	1
1	0	0	0	58.6926	1	0	0	0	0	1	0	0	0	0	0	0	0	0	0	0	0	0	1	0	1	0	1	0	1	2	0	0	0	0	0	0	0	0	0	13	1	38.2	36.8	0	0	0	0	0
0	1	0	0	73.6148	1	0	0	0	0	1	0	0	0	0	0	0	0	0	0	0	0	0	1	0	0	0	1	1	0	2	1	1	0	0	0	0	0	0	0	30	0	0	0	0	0	0	0	0
1	1	0	0	86.9928	1	1	1	0	0	1	1	0	0	0	0	0	0	0	0	0	0	0	0	0	0	1	1	1	0	2	0	0	0	0	0	0	0	0	0	27	0	36.4	35.4	0	0	0	0	0
0	1	0	0	72.7724	0	0	0	0	0	1	0	0	0	1	0	0	0	1	0	0	0	0	0	0	0	0	0	1	0	2	0	1	0	0	0	0	0	0	0	38	0	0	0	0	0	0	0	0
0	1	0	0	62.6142	0	1	0	0	0	1	0	0	0	0	0	1	0	1	0	0	0	0	0	0	1	0	1	1	1	1	1	1	0	0	0	0	0	0	0	33	0	0	0	0	0	0	0	0
0	1	0	0	57.302	1	0	0	0	0	1	0	0	0	0	0	1	0	1	0	0	0	0	0	0	1	0	1	0	0	1	1	1	1	0	0	1	0	0	0	42	0	0	0	0	0	0	0	0
1	1	0	0	80.3366	1	1	0	1	0	1	1	0	0	0	1	0	0	0	0	0	1	0	0	0	0	0	1	1	0	4	1	0	0	0	0	0	0	0	0	7	1	38	36.1	0	0	0	0	0
1	1	0	0	30.542	1	1	0	0	0	0	0	0	0	0	0	0	0	0	0	0	0	0	0	0	0	0	0	0	0	4	0	1	1	0	0	0	0	0	0	2	0	36.2	36	1	0	0	1	1
1	0	0	0	62.5591	0	0	0	1	0	1	0	0	1	1	1	1	0	0	0	0	0	0	0	0	1	0	1	1	0	1	1	1	1	0	0	0	0	0	0	3	1	38.2	36.2	1	0	0	1	0
1	1	0	1	63.9763	1	1	0	0	0	0	1	0	0	0	0	0	0	0	0	0	0	0	0	0	0	1	1	0	0	2	0	0	0	0	0	0	0	0	0	14	0	32.5	31.5	0	0	0	0	0
1	1	0	0	79.0734	0	0	0	0	0	1	0	0	0	0	1	1	0	0	0	0	0	0	0	0	1	1	1	0	0	2	0	0	1	0	0	0	0	0	0	9	0	36.9	36.3	0	0	0	0	0
0	1	0	0	66.6084	1	0	0	0	0	1	0	0	0	0	0	0	0	1	0	0	0	0	0	0	0	0	0	1	0	2	0	0	0	0	0	0	0	0	0	25	0	0	0	0	0	0	0	0
1	1	0	0	64.4748	1	0	0	1	0	1	1	1	1	0	0	0	0	0	0	0	0	0	0	0	0	1	1	0	0	2	0	0	0	0	0	0	0	0	0	29	0	34.5	34.5	0	0	0	0	0
1	0	0	0	72.7022	1	0	0	0	0	0	0	0	0	0	0	0	0	0	0	0	0	0	0	0	0	0	0	0	0	2	0	0	0	0	0	0	0	0	0	5	0	36.7	36	0	0	0	1	1
0	1	0	0	59.0314	1	0	1	0	0	0	1	1	0	0	1	1	0	0	0	0	0	0	1	0	0	0	1	1	0	2	0	0	0	0	0	0	0	0	0	115	0	0	0	0	0	0	0	0
1	1	0	0	59.1827	1	0	0	1	0	0	0	0	0	0	0	0	0	0	0	0	0	0	0	0	0	0	0	0	0	4	1	1	0	0	0	0	0	0	0	4	0	37.4	35.8	1	0	0	1	1
1	1	0	0	59.6804	1	0	1	1	0	1	0	0	0	1	0	0	0	0	0	0	0	0	0	0	1	0	1	1	1	1	1	1	1	0	0	0	0	0	0	2	0	36.4	35.5	0	0	0	1	1
1	0	0	0	54.6312	1	0	1	0	0	1	0	0	0	0	1	0	0	0	0	0	1	0	0	0	1	0	1	1	0	1	1	1	0	0	0	1	0	0	0	2	1	38.3	37	0	0	0	0	0
0	1	0	0	39.928	1	0	0	0	0	1	0	0	0	1	0	1	0	1	0	0	0	0	0	0	0	0	0	0	0	1	1	1	0	0	0	1	0	0	0	16	0	0	0	0	0	0	0	0
1	1	0	0	45.1763	1	0	0	0	0	1	0	0	0	0	1	1	0	0	0	0	0	0	1	0	1	1	1	0	1	2	1	0	0	0	0	0	0	0	0	9	0	36.7	36.1	0	0	0	0	0
0	1	0	0	63.4366	1	0	0	0	0	0	0	0	0	0	0	0	0	0	0	0	0	0	1	0	0	0	1	1	1	2	0	0	0	0	0	0	0	0	0	47	0	0	0	0	0	0	0	0
1	1	0	0	80.4622	0	0	0	0	0	1	1	0	0	0	0	0	0	0	0	0	0	0	0	0	1	1	1	1	0	1	1	1	0	0	0	1	0	0	0	13	0	36.1	36.1	0	0	0	0	0
0	1	0	0	48.1974	1	0	1	0	0	1	1	1	0	0	1	0	0	0	0	0	0	0	0	0	0	0	0	1	0	2	1	1	1	0	0	0	0	0	0	34	0	0	0	0	0	0	0	0
1	1	0	0	57.2287	0	0	0	0	0	1	0	0	0	1	0	1	0	1	0	1	0	0	0	0	1	0	1	1	0	2	0	0	0	0	0	1	0	0	0	47	1	38.2	36	0	0	0	0	0
1	1	0	0	76.829	0	1	0	1	0	1	0	0	0	0	0	0	0	0	0	0	0	0	0	0	0	0	0	1	0	1	1	1	1	0	0	0	0	0	0	5	0	37	35.5	1	0	0	1	1
1	1	0	0	55.8253	1	0	0	0	0	0	0	0	1	0	0	0	0	0	0	0	0	0	1	0	0	1	1	1	0	2	0	0	0	0	0	0	0	0	0	38	0	34.1	33.3	0	0	0	0	0
1	1	0	0	67.9578	1	0	0	0	0	1	1	0	1	1	0	0	0	1	0	0	0	0	0	0	1	0	1	0	1	2	0	0	0	0	0	0	0	0	0	11	1	38.4	35.7	0	0	0	0	0
1	1	0	0	53.2884	1	0	0	0	0	1	0	0	0	0	0	0	0	1	0	0	0	0	1	0	0	0	1	0	1	2	1	0	0	0	0	0	0	0	0	69	0	37.5	37.5	0	0	0	0	0
0	1	0	0	67.7128	0	0	0	0	0	1	0	0	0	0	0	1	0	1	0	0	0	0	0	0	1	0	1	1	0	2	0	0	0	0	0	0	0	0	0	54	0	0	0	0	0	0	0	0
1	1	0	0	63.8464	0	0	0	0	0	0	1	0	1	0	0	0	0	0	0	0	0	0	1	0	0	0	1	1	0	2	0	0	0	0	0	1	0	0	0	8	0	37.1	35.6	0	0	0	0	0
1	1	0	0	77.2755	1	1	0	0	0	1	1	0	0	1	0	0	1	0	0	0	0	0	0	0	1	0	1	1	0	4	1	1	0	0	0	0	1	0	0	6	0	36.8	35.8	0	0	0	0	0
0	1	0	0	87.9159	1	0	0	0	0	1	1	0	0	0	0	1	0	0	0	0	0	0	0	0	1	0	1	1	1	1	1	1	0	0	0	1	0	0	0	33	0	0	0	0	0	0	0	0
1	1	0	0	37.9956	1	1	0	0	0	1	1	0	1	0	0	0	0	0	0	0	0	0	1	0	1	1	1	1	0	2	0	0	0	0	0	0	0	0	0	7	0	35.5	35	0	0	0	0	0
1	1	0	0	78.9034	0	0	0	0	0	1	1	0	1	0	0	0	0	0	0	0	0	0	0	0	0	0	0	0	0	2	0	0	1	0	0	0	0	0	0	17	0	37.1	35.6	0	0	0	0	0
0	1	0	0	90.477	1	0	0	0	0	1	0	0	0	0	0	0	0	0	0	0	0	0	1	0	0	0	1	1	0	2	0	0	0	0	0	1	0	0	0	10	0	0	0	0	0	0	0	0
0	1	0	0	76.0724	1	0	0	0	0	1	0	0	0	0	1	0	0	0	0	0	0	0	1	0	1	0	1	0	0	1	1	1	0	0	0	0	0	0	0	45	0	0	0	0	0	0	0	0
1	1	0	0	84.6944	1	0	0	0	0	1	0	0	0	0	0	1	0	0	0	0	0	0	1	0	1	0	1	0	1	1	1	1	0	0	0	0	0	0	0	15	0	37.1	36.3	0	0	0	1	0
0	1	0	0	60.748	0	0	0	0	0	1	0	0	0	0	0	0	1	0	0	0	0	0	0	0	0	0	0	1	1	2	0	0	0	0	0	0	0	0	0	100	0	0	0	0	0	0	0	0
0	1	0	0	71.9812	0	0	0	0	0	1	0	0	0	1	1	0	0	1	0	0	0	0	0	0	1	0	1	1	1	2	1	1	0	0	0	0	0	0	0	100	0	0	0	0	0	0	0	0
1	1	0	0	61.1587	0	1	1	1	0	1	1	1	0	0	0	0	0	0	0	0	0	0	0	0	1	1	1	1	0	1	1	1	0	0	0	1	1	0	0	20	0	35.8	35.7	0	0	0	0	0
1	1	0	0	85.4886	1	0	1	0	0	0	0	0	0	0	1	0	0	0	0	0	0	0	1	0	0	0	1	1	0	4	1	0	1	0	0	1	0	0	1	33	0	37.6	34.8	0	0	0	1	0
1	1	0	0	80.9451	1	1	0	0	1	1	1	1	0	0	0	1	0	0	0	1	0	0	1	0	0	1	1	1	0	2	0	0	0	0	0	0	0	0	0	47	0	36.3	35.2	0	0	0	0	0
0	1	0	0	58.8285	1	0	0	0	0	1	0	0	1	0	0	0	0	0	0	0	0	0	1	0	1	0	1	1	0	1	1	1	0	0	0	1	0	0	0	30	0	0	0	0	0	0	0	0
0	1	0	0	56.7158	0	0	0	0	0	1	0	0	0	0	0	0	0	1	0	0	0	0	0	0	0	0	0	0	0	2	1	1	0	0	0	1	0	0	0	32	0	0	0	0	0	0	0	0
1	1	0	0	51.5922	1	1	0	0	0	1	0	0	0	0	0	0	0	0	0	0	0	0	0	0	1	0	1	1	1	1	1	1	1	0	0	0	0	0	0	2	1	38.8	36.8	0	0	0	1	1
1	1	0	0	71.7044	0	0	0	0	1	1	1	1	0	0	0	0	0	0	0	0	0	0	0	0	1	1	1	1	0	1	1	1	0	0	0	1	0	0	0	4	1	38.5	35.7	0	0	0	0	0
1	1	0	0	40.6973	1	0	0	1	0	0	0	0	0	0	1	0	0	0	0	0	0	0	0	0	1	1	1	0	1	3	1	1	0	0	0	1	0	0	0	7	1	39.5	37.1	0	0	0	0	0
1	1	0	0	34.1122	0	1	0	0	0	1	1	0	1	0	0	0	0	1	0	0	1	0	0	0	1	0	1	0	0	1	1	1	0	0	0	1	0	0	0	4	1	38.1	37	0	0	0	0	0
0	1	0	0	85.4354	1	0	0	1	0	1	0	0	0	0	1	0	0	0	0	0	0	0	0	0	1	0	1	1	0	2	1	1	0	0	0	0	0	0	0	36	0	0	0	0	0	0	0	0
1	1	0	0	70.3759	1	0	1	0	1	1	1	0	1	0	0	0	1	0	0	0	1	0	1	0	1	1	1	1	0	1	1	1	1	0	0	1	0	0	0	6	0	37.4	36.5	0	0	0	0	0
0	1	0	0	60.6129	1	0	0	0	0	1	1	0	1	0	0	0	0	0	0	0	0	0	1	0	1	0	1	1	0	1	1	1	0	0	0	1	0	0	0	32	0	0	0	0	0	0	0	0
1	1	0	1	66.2708	0	1	1	0	0	1	0	0	0	0	1	0	0	0	0	0	0	0	0	0	1	1	1	0	0	1	1	1	1	0	0	1	0	0	0	32	0	37.1	34.5	0	0	0	0	0
0	1	1	0	42.8349	1	0	0	0	0	1	1	1	0	0	0	0	1	1	0	0	0	0	0	0	1	0	1	0	0	1	1	1	0	0	0	1	1	0	0	60	0	0	0	0	0	0	0	0
1	1	0	0	81.3843	0	1	0	1	0	1	1	0	1	0	0	0	0	0	0	0	0	0	0	0	1	1	1	0	0	1	1	1	0	0	0	0	0	0	0	59	0	35.7	35.3	0	0	0	0	0
0	1	0	0	80.2733	1	1	0	0	0	1	1	0	0	0	0	0	0	0	0	0	0	0	0	0	1	0	1	1	1	1	1	1	0	0	0	1	1	0	0	29	0	0	0	0	0	0	0	0
1	1	0	1	59.8312	0	0	0	0	0	1	1	0	0	0	1	0	0	0	0	0	0	0	0	0	1	1	1	0	0	2	1	1	0	0	0	0	0	0	0	24	0	36.3	33.3	0	0	0	0	0
0	1	0	0	70.1742	1	0	0	0	0	1	0	0	0	0	0	1	0	0	0	0	0	0	1	0	1	0	1	1	0	2	0	1	0	0	0	0	0	0	0	145	0	0	0	0	0	0	0	0
0	1	0	0	64.7099	1	0	0	0	0	1	0	0	0	0	0	0	0	0	0	0	0	0	1	0	0	0	1	1	0	2	0	0	0	0	0	1	0	0	0	41	0	0	0	0	0	0	0	0
0	1	0	0	37.0174	1	1	1	0	0	1	0	0	0	0	0	0	0	0	0	0	0	0	0	0	1	0	1	0	0	1	1	1	0	0	0	1	0	0	0	3	0	0	0	0	0	0	0	0
1	1	0	0	92.6161	0	1	0	0	0	1	1	1	0	0	0	0	0	0	0	1	1	0	0	0	0	1	1	1	0	2	0	0	1	0	0	0	0	0	0	18	0	37.7	35.7	0	0	0	0	0
1	1	0	0	55.4034	0	0	0	0	1	0	0	0	0	0	0	0	0	1	0	1	1	0	1	0	0	0	1	1	0	2	0	0	0	0	0	1	0	0	0	4	1	39.2	36.8	0	0	0	1	1
1	0	0	0	60.1381	1	0	1	0	0	0	0	0	0	0	0	0	0	0	0	1	0	0	0	0	0	0	1	0	0	4	1	1	0	0	0	0	0	0	0	2	0	36.2	35.6	0	0	0	1	1
1	1	0	0	70.7712	1	0	1	0	0	0	0	0	0	0	1	0	0	0	0	0	1	0	0	0	0	0	1	1	1	1	1	1	1	0	0	0	0	0	0	4	0	35.8	34.9	0	0	0	1	1
1	1	0	1	83.834	0	1	0	1	0	0	0	0	0	0	1	0	0	0	0	0	0	0	0	0	0	0	0	0	0	1	1	1	1	0	0	1	0	0	0	23	0	36.1	35.1	1	0	0	1	0
1	1	0	0	48.328	1	0	0	0	0	1	1	0	0	0	0	0	0	0	0	0	0	0	1	0	0	1	1	1	0	2	0	0	0	0	0	0	0	0	0	40	1	39.3	39.3	0	0	0	0	0
0	1	0	0	78.6949	1	0	0	0	0	1	0	0	0	1	0	0	0	1	0	0	0	0	0	0	1	0	1	1	0	1	1	1	0	0	0	0	0	0	0	42	0	0	0	0	0	0	0	0
1	1	0	0	84.9924	0	0	0	0	0	1	0	0	0	0	0	0	0	0	0	0	0	0	0	0	1	1	1	0	1	2	0	0	0	0	0	0	0	0	0	86	0	36.3	34.5	0	0	0	0	0
1	1	0	0	56.3555	0	1	0	1	0	1	1	1	0	0	0	0	0	0	0	0	0	0	0	0	0	1	1	1	0	2	0	1	1	0	0	0	0	0	0	16	0	37.3	35.7	0	0	0	0	0
1	1	0	0	75.0277	1	0	0	0	0	1	0	0	0	0	1	1	0	0	0	0	0	0	0	0	1	1	1	1	0	1	1	1	0	0	0	1	0	0	0	3	0	37.3	35.5	0	0	0	0	0
0	1	0	0	77.3379	0	1	0	0	0	1	1	1	0	0	1	0	0	0	0	0	0	0	0	0	1	0	1	0	0	1	1	1	0	0	0	1	1	0	0	24	0	0	0	0	0	0	0	0
0	1	0	0	74.1366	1	1	0	0	1	1	0	0	1	0	0	1	0	1	0	0	0	0	1	0	1	0	1	0	0	1	1	1	0	0	0	1	0	0	0	34	0	0	0	0	0	0	0	0
1	1	0	0	51.3557	1	0	0	0	1	1	1	1	1	0	0	1	0	0	0	0	1	0	0	0	1	1	1	0	0	1	1	1	0	0	0	0	0	0	0	6	1	39	37.3	0	0	0	0	0
1	1	0	0	47.0505	1	0	1	0	0	1	0	0	0	0	0	0	0	0	0	0	0	0	0	0	0	0	0	1	0	1	1	1	1	0	0	0	0	0	0	8	0	36.8	36.2	0	0	0	1	1
0	1	0	0	58.8123	1	0	0	0	0	1	1	1	0	0	0	1	0	0	0	0	0	0	0	0	1	0	1	1	1	1	1	1	0	0	0	1	0	0	0	70	0	0	0	0	0	0	0	0
0	1	0	0	94.2836	0	1	0	0	0	1	0	1	0	0	1	0	0	0	0	0	0	0	0	0	1	0	1	1	0	2	1	0	0	0	0	0	0	0	0	64	0	0	0	0	0	0	0	0
0	1	0	0	82.8397	0	0	0	0	0	1	0	0	0	1	1	1	0	0	0	0	0	0	0	0	1	0	1	1	1	2	0	0	0	0	0	0	0	0	0	41	0	0	0	0	0	0	0	0
0	1	0	0	86.1063	1	0	0	0	0	1	0	0	0	0	0	1	0	0	0	0	0	0	0	0	1	0	1	1	0	1	1	1	0	0	0	0	0	0	0	43	0	0	0	0	0	0	0	0
1	1	0	0	60.422	1	0	0	0	1	1	0	0	0	0	1	1	0	0	0	1	1	0	0	0	1	1	1	1	0	1	1	1	0	0	0	1	0	0	0	2	1	39.2	35.6	0	0	0	0	0
0	1	0	0	74.3452	1	0	0	0	0	0	1	1	0	0	1	0	0	0	0	0	0	0	1	0	1	0	1	0	1	2	0	0	1	0	0	0	0	0	0	40	0	0	0	0	0	0	0	0
1	1	0	0	69.9607	0	0	0	0	0	0	0	0	0	1	1	0	0	0	0	0	0	0	0	0	1	0	1	1	0	2	0	0	0	0	0	0	0	0	0	25	1	38.2	36.6	0	0	0	0	0
1	1	0	0	48.8136	1	0	0	0	0	0	0	0	0	1	0	1	1	0	0	0	1	0	1	0	1	0	1	1	0	2	0	0	0	0	0	1	0	0	0	19	1	39.6	38.1	0	0	0	1	0
1	1	0	0	30.2423	1	0	0	0	0	0	0	0	0	0	0	0	0	0	0	0	0	0	1	0	0	1	1	1	1	2	1	0	0	0	0	0	0	0	0	8	0	34.2	34.1	0	0	0	0	0
0	1	0	0	53.8066	0	0	0	0	0	1	0	0	0	0	0	0	0	0	0	0	0	0	0	0	0	0	0	1	0	1	1	1	0	0	0	0	0	0	0	12	0	0	0	0	0	0	0	0
0	1	0	0	35.6969	0	0	0	0	1	1	0	0	0	1	0	0	0	0	0	0	0	0	0	0	0	0	0	1	1	1	1	1	1	0	0	1	0	0	0	37	0	0	0	0	0	0	0	0
1	1	0	0	73.7905	0	0	0	1	0	1	0	0	0	1	0	1	0	0	0	0	0	0	1	0	1	1	1	1	0	1	1	1	0	0	0	1	0	0	0	3	1	39.6	36.5	0	0	0	0	0
0	1	0	0	90.8225	1	1	1	1	0	1	1	0	0	0	0	1	0	0	0	0	0	0	1	0	1	0	1	1	1	1	1	1	1	0	0	0	0	0	0	37	0	0	0	0	0	0	0	0
0	1	0	0	86.3624	0	0	0	0	0	1	0	0	0	0	0	1	0	0	0	0	0	0	1	0	1	0	1	1	0	1	1	1	0	0	0	1	0	0	0	29	0	0	0	0	0	0	0	0
0	1	0	0	32.8521	1	0	0	0	0	1	0	0	0	0	0	0	0	1	0	0	0	0	0	0	0	0	0	1	0	2	0	1	0	0	0	0	0	0	0	30	0	0	0	0	0	0	0	0
1	0	0	0	58.7095	0	1	0	1	0	0	0	0	0	0	1	0	0	0	0	0	0	0	0	0	0	0	0	0	1	2	0	0	1	0	1	0	0	0	0	25	0	36.6	35.7	1	0	0	1	1
1	1	0	0	61.687	1	1	1	0	1	0	0	0	0	0	1	1	0	0	0	0	0	0	0	0	1	0	1	1	0	1	1	1	0	0	0	1	0	0	0	13	0	37.1	35.6	0	0	0	0	0
0	1	0	0	62.0545	0	0	0	0	0	0	1	1	0	0	0	0	0	0	0	0	0	0	0	0	0	0	0	0	0	2	0	1	0	0	0	0	0	0	0	45	0	0	0	0	0	0	0	0
1	1	0	0	70.8343	0	1	1	0	0	1	1	1	0	1	1	1	0	0	0	0	0	0	0	0	1	0	1	1	0	2	1	1	0	0	0	0	0	0	0	32	0	37.1	35.6	0	0	0	0	0
1	1	0	0	44.3861	0	0	0	0	0	1	0	1	1	0	0	1	0	1	0	0	0	0	1	0	0	1	1	1	0	1	1	1	0	0	0	1	0	0	0	5	0	37	35	0	0	0	0	0
0	1	0	0	68.5939	1	0	0	0	0	0	1	0	1	0	0	0	0	0	0	0	0	0	1	0	1	0	1	1	0	1	1	1	0	0	0	0	0	0	0	69	0	0	0	0	0	0	0	0
1	1	0	0	79.4567	1	0	0	0	0	1	0	0	0	0	0	0	0	0	0	0	0	0	0	0	0	0	0	0	0	2	0	0	0	0	0	0	0	0	0	20	0	37.2	35.4	0	0	0	1	1
1	1	0	0	71.2428	1	1	0	1	0	0	1	0	1	0	1	0	0	0	0	0	0	0	0	0	0	0	0	0	1	1	1	1	0	0	0	1	1	0	0	14	0	36.1	35.4	0	0	0	0	0
1	1	0	0	64.6654	1	0	0	0	0	1	0	0	0	0	0	1	0	0	0	0	0	0	0	0	0	1	1	1	1	2	0	0	0	0	0	0	0	0	0	16	0	37.1	35.6	0	0	0	0	0
1	1	0	0	24.422	1	0	0	0	0	1	0	0	0	1	0	0	0	0	0	0	0	0	0	0	0	0	0	1	1	1	1	1	0	0	0	0	0	0	0	10	1	39.1	36.8	0	0	0	1	1
0	1	0	0	72.8234	1	0	0	0	0	0	0	0	0	0	0	0	0	1	0	0	0	0	0	0	0	0	0	1	0	2	1	0	0	0	0	1	0	0	0	54	0	0	0	0	0	0	0	0
1	1	0	0	27.1323	1	0	0	0	0	1	0	0	0	0	0	1	0	0	0	0	0	0	0	0	1	1	1	1	0	1	1	1	0	0	0	0	0	0	0	3	0	37.4	36.2	0	0	0	1	1
1	1	0	0	86.3546	1	0	0	0	0	1	1	1	0	0	1	0	0	0	0	0	0	0	0	0	1	0	1	1	0	1	1	1	0	0	0	1	0	0	0	4	0	37.2	35.5	0	0	0	1	0
0	1	0	0	83.6706	1	0	0	1	0	1	1	1	0	0	1	1	1	0	0	0	0	0	0	0	1	0	1	0	0	1	1	1	1	0	0	1	0	0	0	34	0	0	0	0	0	0	0	0
1	1	0	0	41.653	0	0	0	0	0	0	0	0	0	0	0	0	0	0	0	0	1	0	0	0	0	0	1	1	1	2	0	0	0	0	0	0	0	0	0	20	0	37.1	35.6	0	0	0	0	0
1	1	0	0	61.0686	1	0	1	1	0	1	0	0	0	1	0	1	0	0	0	0	0	0	1	0	0	0	1	1	0	2	1	1	0	0	0	0	0	0	0	11	1	39.3	36.4	0	0	0	0	0
0	1	0	0	65.1446	1	0	0	0	0	0	0	0	0	0	1	0	0	1	0	0	0	0	0	0	0	0	0	1	0	2	0	0	0	0	0	0	0	0	0	43	0	0	0	0	0	0	0	0
1	1	0	1	69.968	1	1	0	0	0	1	1	0	1	0	0	0	0	0	0	0	0	0	0	0	1	1	1	1	0	1	1	1	0	0	0	1	0	0	0	20	0	36.9	35.2	0	0	0	0	0
1	1	0	0	75.596	0	0	0	1	0	1	0	0	0	0	0	0	0	0	0	1	0	0	0	1	0	0	1	0	0	2	0	0	1	0	0	0	0	0	0	41	0	37.9	35.8	0	0	0	1	0
1	1	0	0	58.7764	0	1	1	0	0	1	1	1	0	0	1	1	0	0	0	0	0	0	1	0	0	0	1	1	0	2	0	0	0	0	0	0	0	0	0	41	0	37.1	35.6	0	0	0	0	0
0	1	0	0	61.253	0	0	0	0	0	1	0	0	0	0	0	1	0	1	0	0	0	0	0	0	1	0	1	0	0	1	1	1	0	0	0	1	0	0	0	34	0	0	0	0	0	0	0	0
0	1	0	0	76.6574	1	1	0	0	0	1	1	0	0	0	0	0	0	0	0	0	0	0	1	0	1	0	1	1	0	2	1	0	0	0	0	0	0	0	0	18	0	0	0	0	0	0	0	0
0	1	0	0	60.9906	1	1	0	1	0	1	0	0	1	0	1	1	0	0	0	0	0	0	0	0	0	0	0	1	0	2	0	1	0	0	0	0	0	0	0	55	0	0	0	0	0	0	0	0
0	1	0	0	74.2021	1	0	0	1	0	1	0	0	1	1	0	1	0	0	0	0	0	0	0	0	1	0	1	1	0	2	0	0	0	0	0	0	0	0	0	57	0	0	0	0	0	0	0	0
1	1	0	0	62.7904	1	0	1	0	0	1	1	0	1	0	0	0	0	1	0	1	1	0	0	1	1	0	1	1	1	2	0	0	0	0	0	0	0	0	0	63	0	36.2	33.9	0	0	0	0	0
0	1	0	0	74.174	1	0	0	1	0	1	1	1	1	0	0	1	0	0	0	0	0	0	0	0	1	0	1	1	1	1	1	1	0	0	1	1	0	0	0	40	0	0	0	0	0	0	0	0
1	0	0	0	61.2468	1	0	0	0	0	1	0	0	1	0	0	0	1	1	0	0	0	0	0	0	1	0	1	0	0	2	0	0	0	0	0	0	0	0	0	12	0	37.1	35	0	0	0	0	0
1	1	0	1	70.941	1	1	1	0	0	0	0	0	0	0	1	1	0	0	0	0	0	0	0	0	1	1	1	1	0	2	0	0	0	0	0	1	0	0	0	15	0	37.7	35.4	0	0	0	1	1
1	1	0	0	75.3166	0	0	0	1	0	0	0	0	0	0	0	0	0	0	0	0	0	0	0	1	0	1	1	0	0	2	0	0	0	0	0	0	0	0	0	65	0	35.7	34.3	0	0	0	0	0
0	1	0	0	84.3906	1	1	0	0	0	1	0	0	0	0	0	0	0	0	0	0	0	0	0	0	1	0	1	0	0	2	0	0	0	0	0	0	0	0	0	45	0	0	0	0	0	0	0	0
0	1	0	0	87.0287	0	1	0	0	0	1	0	0	0	0	1	0	0	0	0	0	0	0	0	0	1	0	1	1	0	2	0	0	0	0	0	0	0	0	0	17	0	0	0	0	0	0	0	0
1	0	0	0	60.1179	1	1	0	0	0	0	1	1	1	0	1	1	0	0	0	1	1	0	0	0	0	0	1	1	1	2	1	1	1	0	0	0	0	0	0	29	0	37.5	35.7	0	0	0	0	0
0	1	0	0	48.1496	0	0	0	0	0	0	0	0	0	0	0	0	0	1	0	0	0	0	0	0	1	0	1	0	0	4	0	0	0	0	0	0	0	0	0	45	0	0	0	0	0	0	0	0
0	1	0	0	55.7694	1	0	0	0	0	1	1	0	0	1	1	0	0	1	0	0	0	0	0	0	1	0	1	1	1	1	1	1	0	0	0	1	0	0	0	56	0	0	0	0	0	0	0	0
1	1	0	0	64.0322	0	0	0	0	0	1	1	0	0	0	0	0	0	1	0	0	0	0	1	0	1	0	1	1	1	1	1	1	0	0	0	0	0	0	0	25	0	37.1	35.6	0	0	0	0	0
1	1	0	0	63.7732	1	0	0	0	0	0	1	1	0	0	0	1	1	1	0	0	0	0	0	0	0	1	1	1	1	2	0	0	0	0	0	0	0	0	0	20	0	37.3	36.2	0	0	0	0	0
0	1	0	0	83.4615	0	1	0	1	0	1	0	0	0	0	0	1	0	0	0	0	0	0	0	0	0	0	0	1	1	2	0	0	0	0	0	0	0	0	0	105	0	0	0	0	0	0	0	0
0	1	0	0	78.8319	0	0	0	0	0	1	0	0	1	0	0	1	0	0	0	0	0	0	0	0	1	0	1	0	0	2	0	0	0	0	0	0	0	0	0	25	0	0	0	0	0	0	0	0
1	1	0	0	73.2604	1	0	0	1	0	0	0	0	0	0	1	0	0	0	0	0	0	0	0	0	0	0	0	0	0	2	0	0	0	0	0	0	0	0	0	11	0	36.8	34.6	0	0	0	1	1
1	0	0	0	66.1153	0	0	1	0	0	0	0	0	0	0	0	0	0	0	0	0	0	0	0	0	1	0	1	0	0	4	1	1	0	0	0	0	0	0	0	4	0	36.8	36.3	0	0	0	1	1
1	1	0	0	77.0748	1	0	0	1	0	1	0	0	0	0	0	0	0	0	0	0	0	0	0	0	0	0	0	0	1	2	0	0	0	0	0	0	0	0	0	11	0	36.9	36.5	0	0	0	1	0
1	1	0	0	67.9201	0	1	0	1	0	1	0	0	0	0	0	1	0	0	0	1	0	0	0	0	0	0	1	1	0	2	0	0	0	0	0	0	0	0	0	12	0	37	34.9	0	0	0	1	0
0	1	0	0	94.1975	0	1	0	1	0	1	1	0	1	0	0	1	0	0	0	0	0	0	1	0	1	0	1	0	1	1	1	1	0	0	0	0	0	0	0	17	0	0	0	0	0	0	0	0
1	1	0	1	50.6477	1	0	1	0	0	1	1	1	0	0	1	0	0	0	0	0	1	0	1	0	1	0	1	1	0	1	1	1	0	0	0	1	0	0	0	2	0	36.3	35.6	0	0	0	0	0
1	0	0	0	42.326	0	0	1	1	0	1	1	0	1	0	0	0	0	0	0	1	1	0	0	0	1	0	1	0	1	1	1	1	1	0	0	0	0	0	0	6	0	35.8	35.2	0	0	0	1	1
1	1	0	0	70.5862	0	0	0	0	0	0	0	0	0	0	0	0	0	0	0	0	0	0	0	0	0	0	0	0	1	2	0	0	0	0	0	0	0	0	0	3	0	36.5	35	0	0	0	1	1
1	0	0	0	83.3693	1	0	1	1	0	1	0	0	0	1	0	1	0	0	0	0	0	0	0	0	1	0	1	0	1	1	1	1	0	0	0	0	0	0	0	3	0	36.8	36	0	0	0	1	0
1	1	0	0	62.9	1	1	0	0	0	1	1	1	0	0	1	0	0	0	0	1	1	0	0	0	1	0	1	1	0	1	1	1	0	0	0	1	0	0	0	30	0	35.4	35	0	0	0	0	0
0	1	0	0	66.2685	1	1	0	1	0	0	0	0	0	0	1	0	0	0	0	0	0	0	0	0	0	0	0	0	0	2	0	0	0	0	0	0	0	0	0	74	0	0	0	0	0	0	0	0
0	1	0	0	61.1121	1	0	0	0	0	1	0	0	0	0	0	0	0	1	0	0	0	0	0	0	0	0	0	1	0	2	0	0	0	0	0	0	0	0	0	65	0	0	0	0	0	0	0	0
1	1	0	0	43.3174	1	0	0	0	0	1	0	0	0	0	0	1	0	1	0	0	0	0	1	0	0	0	1	0	0	1	1	1	0	0	0	1	0	0	0	25	1	39.2	36.4	0	0	0	0	0
0	1	0	0	44.0125	1	0	0	0	0	0	0	0	0	0	0	1	0	0	0	0	0	0	0	0	0	0	0	0	0	2	0	0	0	0	0	0	0	0	0	31	0	0	0	0	0	0	0	0
1	0	0	1	57.9141	1	1	0	0	0	1	1	0	1	0	0	0	0	0	0	1	0	0	0	0	0	0	1	1	1	1	1	1	1	0	1	1	0	0	0	3	0	37.1	36.2	0	0	0	0	0
1	1	0	0	75.555	1	1	0	0	0	1	0	0	0	0	1	1	0	0	0	0	0	0	0	0	1	0	1	0	1	1	1	1	0	0	0	0	1	0	0	7	0	37.2	34	0	0	0	0	0
1	1	0	0	82.0156	1	0	0	1	0	0	0	0	0	0	0	0	0	0	0	0	0	0	0	1	1	1	1	1	0	2	0	0	0	0	0	1	0	0	0	26	1	39.1	36	0	0	0	0	0
0	1	0	0	68.9302	0	0	0	1	0	0	1	1	0	0	0	1	1	0	0	0	0	0	0	0	0	0	0	1	1	2	1	1	0	0	0	0	0	0	0	197	0	0	0	0	0	0	0	0
0	1	0	0	72.6505	1	0	0	0	0	1	0	0	1	0	0	0	0	1	0	0	0	0	0	0	0	0	0	0	0	2	0	0	0	0	0	0	0	0	0	44	0	0	0	0	0	0	0	0
0	1	0	0	69.2191	1	0	0	0	0	1	0	0	0	0	1	0	0	0	0	0	0	0	1	0	1	0	1	1	0	2	0	0	0	0	0	0	0	0	0	42	0	0	0	0	0	0	0	0
0	1	0	0	79.6902	1	1	0	1	0	1	1	1	0	0	1	0	0	0	0	0	0	0	1	0	1	0	1	1	1	1	1	1	0	0	0	1	0	0	0	43	0	0	0	0	0	0	0	0
0	1	0	0	82.3956	1	1	0	0	0	1	0	0	0	0	0	0	0	0	0	0	0	0	0	0	1	0	1	1	0	2	1	1	0	0	0	0	0	0	0	31	0	0	0	0	0	0	0	0
1	1	0	0	94.1261	0	0	1	1	0	1	0	0	0	0	1	0	0	0	0	1	0	0	0	0	1	1	1	0	1	1	1	1	0	0	0	0	0	0	0	41	0	35.9	35.8	0	0	0	0	0
0	1	0	0	60.2987	1	0	0	0	0	1	1	1	1	0	0	0	0	1	0	0	0	0	0	0	1	0	1	1	0	1	1	1	0	0	0	1	0	0	0	27	0	0	0	0	0	0	0	0
1	1	0	0	63.763	1	0	0	0	0	1	0	0	0	0	0	1	0	0	0	1	1	0	1	0	0	1	1	0	0	1	1	1	0	0	0	1	0	0	0	7	0	35.8	34.1	0	0	0	0	0
1	1	0	0	77.708	0	0	0	0	0	1	0	0	0	1	1	0	1	1	0	1	1	0	0	0	1	0	1	1	1	1	1	1	0	0	0	1	0	0	0	2	0	36.6	35	0	0	0	0	0
1	0	0	0	66.2579	0	1	0	0	0	0	0	0	0	0	1	0	0	0	0	1	0	0	0	0	0	0	1	0	0	4	0	1	0	0	0	0	0	0	0	16	0	找不到	0	0	0	0	1	1
1	0	0	0	81.3241	1	0	1	0	0	0	0	0	0	0	1	1	0	0	0	1	0	0	0	0	0	0	1	0	0	1	1	1	1	0	0	0	0	0	0	2	0	36.5	35.7	0	0	0	1	1
1	1	0	1	73.1571	1	0	1	0	0	1	0	0	0	0	0	0	0	0	0	0	0	0	1	0	1	0	1	0	1	4	1	1	0	0	0	0	0	0	0	17	0	0	0	0	0	0	0	0
1	1	0	0	78.903	1	1	0	1	0	1	1	0	0	1	0	0	0	0	0	0	0	0	0	0	0	1	1	1	0	2	0	0	0	0	0	0	0	0	0	21	0	36.4	35	0	0	0	0	0
0	1	0	0	86.5385	0	0	0	0	0	1	0	0	0	0	0	0	0	0	0	0	0	0	0	0	1	0	1	1	0	1	1	1	0	0	0	0	0	0	0	57	0	0	0	0	0	0	0	0
0	1	0	0	36.8542	0	0	0	0	0	1	0	0	0	0	0	0	0	1	0	0	0	0	0	0	1	0	1	1	0	2	0	0	0	0	0	0	0	0	0	60	0	0	0	0	0	0	0	0
1	1	0	0	55.5735	0	0	0	0	0	1	0	0	0	0	0	1	0	1	0	0	0	0	0	0	1	0	1	1	0	2	1	0	0	1	0	0	0	0	0	58	0	35	35	0	0	0	0	0
1	1	0	0	82.0069	0	1	0	1	0	1	1	0	0	1	0	0	0	0	0	1	1	0	1	0	1	0	1	1	0	1	1	1	0	0	0	1	1	0	0	17	0	32.5	32	0	0	0	0	0
0	1	0	0	66.5464	0	0	0	0	0	1	1	0	0	0	0	0	0	0	0	0	0	0	1	0	1	0	1	1	1	1	1	1	0	0	0	0	0	0	0	32	0	0	0	0	0	0	0	0
1	1	0	0	60.8103	1	0	0	0	0	0	0	0	0	0	0	0	0	0	0	0	0	0	0	0	0	0	0	1	0	2	0	0	0	0	0	0	0	0	0	10	0	37	35.9	0	0	0	1	1
0	1	0	0	79.7415	0	0	1	0	0	1	1	1	0	0	0	1	0	0	0	0	0	0	1	0	1	0	1	0	0	1	1	1	0	0	0	1	0	0	0	27	0	0	0	0	0	0	0	0
0	1	0	0	69.468	1	1	1	0	0	1	0	0	0	0	1	0	0	0	0	0	0	0	0	0	1	0	1	1	1	2	0	0	0	0	0	0	0	0	0	56	0	0	0	0	0	0	0	0
1	1	0	0	50.0476	1	0	0	0	0	0	1	0	0	0	1	0	0	0	0	1	1	0	0	0	1	0	1	1	0	1	1	1	0	0	1	1	0	0	0	16	1	38	37.4	0	0	0	0	0
1	0	0	0	59.1904	1	1	1	1	0	1	0	0	0	0	1	1	0	0	0	0	0	0	0	0	0	0	0	1	0	1	1	1	1	0	0	0	0	0	0	9	1	39	35.8	0	0	0	1	1
0	1	0	0	100.578	0	0	0	0	0	1	0	0	0	0	0	1	0	0	0	0	0	0	0	1	1	0	1	1	1	2	0	0	0	0	0	1	0	0	0	105	0	0	0	0	0	0	0	0
0	1	0	0	20.5256	1	0	0	0	0	1	1	1	0	1	0	0	0	1	0	0	0	0	1	0	1	0	1	1	1	1	1	1	1	0	0	1	1	0	0	12	0	0	0	0	0	0	0	0
0	1	0	0	44.4446	0	0	0	0	0	0	0	0	0	0	0	0	0	0	0	0	0	1	0	1	1	0	1	0	0	4	0	0	0	0	0	0	0	0	0	115	0	0	0	0	0	0	0	0
0	1	0	0	43.8712	1	0	0	0	0	0	0	0	1	0	0	0	0	0	0	0	0	0	1	0	0	0	1	1	0	2	0	0	0	0	0	0	0	0	0	21	0	0	0	0	0	0	0	0
0	1	0	0	81.7229	1	0	0	1	0	1	0	0	1	0	1	1	0	0	0	0	0	0	1	0	0	0	1	1	1	2	0	0	0	0	0	0	0	0	0	71	0	0	0	0	0	0	0	0
0	1	0	0	42.7192	1	0	0	0	0	1	0	0	0	0	0	0	0	1	0	0	0	0	0	0	0	0	0	1	0	2	1	0	0	0	0	0	0	0	0	38	0	0	0	0	0	0	0	0
0	1	0	0	58.9015	0	0	0	0	0	1	0	0	0	0	0	0	0	1	0	0	0	0	0	0	1	0	1	1	0	1	1	1	0	0	0	1	0	0	0	26	0	0	0	0	0	0	0	0
1	1	0	0	73.9699	0	0	0	0	0	0	0	0	0	0	1	0	0	1	0	1	0	0	1	0	0	1	1	0	0	4	0	0	0	0	0	0	0	0	0	16	1	40.9	35.5	0	0	0	0	0
0	1	0	0	81.6053	0	0	1	0	0	1	0	0	0	0	0	1	0	0	0	0	0	0	0	0	1	0	1	0	0	1	1	1	0	0	0	1	0	0	0	23	0	0	0	0	0	0	0	0
0	1	0	0	85.0283	0	1	0	0	0	1	1	0	0	0	0	0	0	0	0	0	0	0	1	0	1	0	1	0	0	1	1	1	0	0	1	1	0	0	0	27	0	0	0	0	0	0	0	0
1	1	0	0	62.9895	1	1	0	0	0	0	1	1	1	1	1	0	0	0	0	1	0	0	0	0	0	0	1	1	0	2	0	0	0	0	0	0	0	0	0	14	1	38.2	35.4	0	0	0	1	0
0	1	0	0	86.0643	0	0	0	0	0	1	1	0	0	0	0	1	0	0	0	0	0	0	0	1	1	0	1	1	0	1	1	1	0	1	0	0	0	0	0	33	0	0	0	0	0	0	0	0
0	1	0	0	59.4136	1	1	0	0	0	1	0	0	0	0	0	0	1	1	0	0	0	0	0	0	1	0	1	1	1	1	1	1	0	0	0	1	0	0	0	20	0	0	0	0	0	0	0	0
0	1	0	0	86.6653	0	0	0	1	0	0	0	0	0	1	0	0	0	0	0	0	0	0	0	0	0	0	0	0	1	2	0	0	0	0	0	0	0	0	0	30	0	0	0	0	0	0	0	0
1	1	0	0	54.5743	1	0	0	0	0	1	1	0	0	0	0	0	1	1	0	0	0	0	1	0	1	0	1	1	0	1	1	1	0	0	0	0	0	0	0	91	0	37.1	35.6	0	0	0	0	0
1	1	0	1	65.674	1	0	0	0	0	1	1	0	0	0	1	0	0	0	0	0	0	0	0	0	1	0	1	0	0	1	1	1	1	1	0	0	0	0	0	16	0	36.7	35.4	0	0	0	0	0
0	1	0	0	81.4216	1	0	0	0	0	0	0	0	0	0	0	0	0	1	0	0	0	0	0	0	1	0	1	1	0	2	0	0	0	0	0	0	0	0	0	60	0	0	0	0	0	0	0	0
1	1	0	0	59.6514	1	1	1	0	0	1	1	1	0	0	1	1	0	0	0	1	0	0	1	0	1	0	1	0	0	1	1	1	0	0	0	1	1	0	0	5	0	37.8	37.5	0	0	0	0	0
0	1	0	1	62.7298	1	0	0	0	0	1	0	0	0	0	0	0	0	0	0	0	0	0	0	0	0	0	0	1	0	2	1	1	0	0	0	0	0	0	0	214	0	0	0	0	0	0	0	0
0	1	0	0	81.5034	1	1	0	1	0	0	0	0	0	0	1	1	1	0	0	0	0	0	0	0	1	0	1	1	0	2	0	0	0	0	0	0	0	0	0	53	0	0	0	0	0	0	0	0
0	1	0	0	27.0309	1	0	0	0	0	1	0	0	0	0	0	0	1	1	0	0	0	0	1	0	0	0	1	1	0	2	1	0	0	0	0	0	0	0	0	77	0	0	0	0	0	0	0	0
1	1	0	1	64.3842	1	0	0	0	0	1	1	1	1	0	0	0	0	0	0	1	0	0	0	1	0	1	1	0	1	1	1	1	0	0	0	0	0	0	0	6	0	36.8	35.8	0	0	0	0	0
0	1	0	0	68.1417	1	0	0	0	0	1	1	0	0	0	0	1	0	1	0	0	0	0	0	0	1	0	1	1	0	1	1	1	0	0	0	1	0	0	0	62	0	0	0	0	0	0	0	0
1	1	0	0	92.3829	1	0	0	0	0	0	0	0	0	0	0	0	0	0	0	0	0	0	0	0	0	0	0	1	0	2	0	0	0	0	0	0	0	0	0	22	0	36	35.2	0	0	0	0	0
0	1	0	0	70.3728	0	0	0	0	0	0	0	0	0	0	0	0	0	1	0	0	0	0	0	0	0	0	0	0	0	2	1	0	0	0	0	1	0	0	0	35	0	0	0	0	0	0	0	0
0	1	0	0	71.9996	1	0	0	0	0	0	0	0	0	0	1	0	0	0	0	0	0	0	0	0	0	0	0	1	1	2	1	1	1	0	0	1	0	0	0	70	0	0	0	0	0	0	0	0
1	1	0	0	35.2817	1	1	0	0	0	1	0	0	0	0	0	0	0	0	0	1	0	0	1	0	1	1	1	0	0	2	0	0	0	0	0	0	0	0	0	38	1	39.4	35.5	0	0	0	0	0
0	1	0	0	68.8573	1	1	1	0	0	1	0	0	0	0	0	0	0	0	0	0	0	0	0	0	1	0	1	1	1	1	1	1	1	0	0	1	0	0	0	50	0	0	0	0	0	0	0	0
1	1	0	0	70.1308	1	1	0	1	0	0	1	1	0	0	1	1	1	0	0	0	0	0	0	0	1	0	1	1	1	2	1	0	0	0	0	0	0	0	0	15	1	39.2	35.2	0	0	0	0	0
0	1	0	0	71.4212	1	1	0	0	0	1	0	0	0	0	1	0	0	1	0	0	0	0	1	0	1	0	1	0	0	1	1	1	0	0	0	0	0	0	0	27	0	0	0	0	0	0	0	0
1	1	0	0	64.5881	0	0	0	0	0	1	1	0	1	0	1	0	0	0	0	1	0	0	0	0	1	0	1	1	0	2	1	1	0	0	0	0	0	0	0	12	1	39.5	36.8	0	0	0	0	0
0	1	0	0	81.2111	1	0	0	1	0	1	1	0	0	0	0	0	0	0	0	0	0	0	0	0	1	0	1	0	1	1	1	1	0	1	0	1	0	0	0	51	0	0	0	0	0	0	0	0
0	1	0	0	87.0697	0	0	0	0	0	1	0	0	0	0	0	0	0	0	0	0	0	0	0	0	1	0	1	1	0	2	0	1	0	0	0	0	0	0	0	30	0	0	0	0	0	0	0	0
1	1	0	0	82.0009	1	1	0	1	0	0	0	0	0	0	0	0	0	0	0	0	0	0	0	0	0	1	1	1	0	2	0	0	0	0	0	0	0	0	0	18	1	40	33.2	0	0	0	0	0
1	1	0	0	76.1844	1	1	0	1	0	1	1	0	0	1	0	0	0	0	0	0	0	0	1	0	1	0	1	0	0	2	1	0	0	0	0	0	0	0	0	5	0	37.2	35.5	0	0	0	1	1
0	1	0	0	27.6523	0	0	0	0	0	0	0	0	0	0	0	0	0	1	0	0	0	0	0	0	0	0	0	1	0	1	1	1	0	0	0	0	0	0	0	56	0	0	0	0	0	0	0	0
1	1	0	0	86.6804	0	0	0	1	0	1	0	0	0	0	0	0	1	0	0	0	0	1	1	1	1	1	1	1	0	2	0	0	0	0	0	0	0	0	0	15	1	38.4	36.2	0	0	0	1	0
0	1	1	0	41.8336	1	1	0	0	0	1	1	1	1	0	0	0	0	0	0	0	0	0	0	0	1	0	1	1	0	1	1	1	0	0	0	1	0	0	0	12	0	0	0	0	0	0	0	0
0	1	0	0	84.5237	1	1	0	0	0	0	0	0	0	0	1	0	1	0	0	0	0	0	0	0	0	0	0	1	0	2	0	0	0	0	0	0	0	0	0	5	0	0	0	0	0	0	0	0
0	1	0	0	55.8644	1	1	0	0	0	1	1	1	0	1	1	0	0	0	0	0	0	0	1	0	1	0	1	0	0	1	1	1	0	0	0	1	1	0	0	54	0	0	0	0	0	0	0	0
0	1	0	0	77.602	0	1	0	0	0	1	0	0	0	0	1	0	0	0	0	0	0	0	0	0	1	0	1	1	0	1	1	1	0	0	0	1	0	0	0	40	0	0	0	0	0	0	0	0
1	1	0	0	87.5608	0	0	0	0	0	1	1	1	0	0	0	1	1	0	0	0	0	0	0	0	1	0	1	0	0	2	0	0	0	0	0	0	0	0	0	5	0	37.8	36.5	0	0	0	1	0
0	1	0	0	84.2573	1	1	0	0	0	0	1	0	0	0	0	0	0	0	0	0	0	0	0	0	0	0	0	1	0	2	0	0	0	0	0	1	0	0	0	97	0	0	0	0	0	0	0	0
0	1	0	0	77.5985	1	0	1	1	0	0	1	0	0	0	0	0	0	0	0	0	0	0	0	0	1	0	1	1	0	2	0	0	0	0	0	0	0	0	0	75	0	0	0	0	0	0	0	0
1	1	0	0	41.1777	1	0	0	1	0	1	0	0	0	0	0	1	0	0	0	0	0	0	0	0	1	0	1	1	0	1	1	1	0	0	0	0	0	0	0	61	1	39.3	32.6	0	0	0	0	0
0	1	0	0	81.0376	0	1	0	0	0	1	1	0	0	0	1	0	1	0	0	0	0	0	0	0	1	0	1	1	0	2	0	0	0	0	0	0	0	0	0	5	0	0	0	0	0	0	0	0
0	1	0	0	54.037	1	0	0	0	0	1	0	0	0	0	0	1	0	0	0	0	0	0	0	0	0	0	0	1	1	2	0	0	0	0	0	0	0	0	0	34	0	0	0	0	0	0	0	0
1	1	0	0	45.3869	0	0	0	0	0	1	1	0	0	1	1	1	0	1	0	0	0	0	0	0	1	1	1	0	1	1	1	1	0	0	0	1	0	0	0	50	0	36.6	35	0	0	0	0	0
0	1	0	0	66.9402	1	1	0	1	1	1	0	0	0	0	0	0	0	0	0	0	0	0	0	0	1	0	1	1	1	1	1	1	1	0	0	1	0	0	0	43	0	0	0	0	0	0	0	0
0	1	1	0	44.8503	1	0	0	0	0	1	0	0	0	0	0	0	0	0	0	0	0	0	0	0	0	0	0	0	0	2	0	0	0	0	0	0	0	0	0	38	0	0	0	0	0	0	0	0
0	1	0	0	88.5697	1	0	0	1	0	1	1	0	0	0	0	0	0	0	0	0	0	0	0	0	1	0	1	1	0	2	0	0	0	0	0	0	0	0	0	63	0	0	0	0	0	0	0	0
0	1	0	0	64.2208	1	0	0	0	0	1	1	1	0	0	1	0	0	0	0	0	0	0	1	0	1	0	1	0	0	1	1	1	0	0	0	0	1	0	0	64	0	0	0	0	0	0	0	0
1	1	0	0	20.4871	0	0	0	0	0	1	0	0	0	0	0	0	0	0	0	1	1	0	0	0	0	1	1	1	0	2	0	0	0	0	0	1	0	0	0	15	1	39.6	37.8	0	0	0	1	1
1	1	0	0	76.9164	0	0	0	0	0	0	0	0	0	0	0	0	0	0	0	0	0	0	0	0	0	0	0	1	1	2	0	0	1	0	0	0	0	0	0	25	0	37.3	36.1	0	0	0	0	0
0	1	0	0	76.103	0	0	1	1	0	1	0	0	0	1	0	0	0	0	0	0	0	0	0	0	1	0	1	0	0	1	1	1	0	0	0	1	0	0	0	68	0	0	0	0	0	0	0	0
0	1	0	0	72.6202	1	0	0	1	0	1	0	0	0	0	0	1	0	0	0	0	0	0	1	0	0	0	1	0	0	2	0	0	0	0	0	0	0	0	0	89	0	0	0	0	0	0	0	0
0	1	0	0	20.7997	0	0	0	0	1	1	1	0	0	0	0	0	0	1	0	0	0	0	0	0	1	0	1	1	0	1	1	1	1	0	0	1	0	0	0	2	0	0	0	0	0	0	0	0
0	1	0	0	49.143	0	0	0	0	0	1	0	0	0	0	0	0	0	0	0	0	0	0	0	0	1	0	1	0	0	1	1	1	0	0	0	1	0	0	0	69	0	0	0	0	0	0	0	0
1	1	0	0	22.2691	1	0	0	0	0	1	1	1	0	0	0	0	0	0	0	1	0	0	0	0	1	0	1	1	1	2	0	0	0	0	0	0	0	0	0	8	1	38.8	35	0	0	0	0	0
0	1	0	0	86.3692	0	0	0	0	0	1	0	0	0	0	1	0	0	0	0	0	0	0	0	0	1	0	1	0	0	2	0	0	0	0	0	0	0	0	0	77	0	0	0	0	0	0	0	0
0	1	0	0	77.6105	1	1	0	1	0	1	0	0	0	0	0	1	0	0	0	0	0	0	0	0	0	0	0	1	1	2	0	0	0	0	0	0	0	0	0	37	0	0	0	0	0	0	0	0
0	1	0	0	66.3602	0	1	0	0	0	1	0	0	0	0	0	0	0	0	0	0	0	0	0	0	0	0	0	1	0	2	0	0	0	0	0	0	0	0	0	31	0	0	0	0	0	0	0	0
1	1	0	0	63.9181	1	0	0	0	0	1	1	0	0	0	1	0	0	0	0	0	0	0	1	0	1	1	1	1	0	2	1	0	0	0	0	0	0	0	0	50	1	39	35.8	0	0	0	0	0
1	1	0	0	54.4356	1	0	0	0	0	0	1	1	0	0	1	0	0	0	0	0	0	0	0	0	1	0	1	0	1	2	0	1	0	0	0	0	0	0	0	42	1	38.8	36.1	0	0	0	0	0
1	1	0	0	84.4508	0	0	0	1	0	1	1	0	0	0	1	0	0	0	0	1	1	0	0	0	1	0	1	0	0	2	1	1	0	0	0	0	0	0	0	16	1	38.2	36.2	0	0	0	0	0
0	1	0	0	46.9045	0	0	0	0	0	1	0	0	0	0	0	0	0	1	0	0	0	0	0	0	1	0	1	1	1	2	1	1	0	0	0	0	0	0	0	30	0	0	0	0	0	0	0	0
0	1	0	0	83.9205	1	0	0	1	0	1	1	0	0	0	1	1	0	0	0	0	0	0	0	0	1	0	1	1	0	2	1	0	0	0	0	0	0	0	0	68	0	0	0	0	0	0	0	0
1	1	0	0	65.8831	1	0	0	1	0	0	1	1	1	0	0	0	0	0	0	0	0	0	0	0	0	1	1	1	0	4	1	1	0	0	0	1	1	0	0	29	0	35.5	35	0	0	0	0	0
1	0	0	0	75.3039	1	0	0	0	0	0	0	0	0	0	0	0	0	0	0	1	0	0	0	0	0	0	1	1	0	2	0	0	0	1	0	0	0	0	0	6	0	37.1	36	1	0	0	1	1
1	1	0	0	67.2321	1	0	0	0	0	1	0	0	0	0	0	0	0	0	0	0	0	0	0	0	1	0	1	0	1	2	1	0	0	1	0	0	0	0	0	30	1	38.1	34.5	0	0	0	0	0
1	1	0	0	74.922	1	0	0	1	0	1	0	0	0	0	0	1	0	0	0	0	0	0	0	1	1	0	1	1	1	1	1	1	1	0	0	1	0	0	0	18	0	37.1	35.6	0	0	0	0	0
0	1	0	0	73.2858	0	0	0	0	0	1	1	0	0	0	0	0	0	0	0	0	0	0	0	1	1	0	1	0	0	1	1	1	0	0	0	1	0	0	0	3	0	0	0	0	0	0	0	0
1	1	0	0	74.8986	1	0	0	0	0	1	0	0	1	0	1	0	0	1	0	1	1	0	0	0	1	1	1	0	0	1	1	1	0	0	0	1	0	0	0	8	0	37.8	35.3	0	0	0	0	0
0	1	0	0	70.2801	1	0	0	0	0	1	0	0	0	0	0	0	0	0	0	0	0	0	0	0	1	0	1	1	0	1	1	1	0	0	0	1	0	0	0	16	0	0	0	0	0	0	0	0
0	1	0	0	68.0666	0	1	0	0	0	1	0	0	0	0	1	0	0	0	0	0	0	0	0	0	1	0	1	1	0	2	1	0	0	0	0	0	0	0	0	64	0	0	0	0	0	0	0	0
0	1	0	0	49.3915	1	0	0	0	1	1	0	0	0	0	0	1	0	0	0	0	0	0	0	0	1	0	1	1	0	2	0	0	0	0	0	0	0	0	0	32	0	0	0	0	0	0	0	0
1	1	0	0	83.9446	0	0	0	0	0	1	1	1	0	0	0	0	0	0	0	1	0	0	0	0	1	0	1	1	0	4	1	0	0	0	0	0	1	0	0	4	1	39.2	35	0	0	0	0	0
0	1	0	0	79.5218	1	1	0	0	1	1	1	0	1	0	0	0	0	0	0	0	0	0	0	0	1	0	1	0	1	1	1	1	0	0	0	1	0	0	0	24	0	0	0	0	0	0	0	0
0	1	0	0	85.5946	1	0	0	0	0	1	1	0	0	0	0	0	0	0	0	0	0	0	0	0	1	0	1	0	0	1	1	1	1	0	0	1	0	0	0	30	0	0	0	0	0	0	0	0
1	0	0	0	72.1166	0	1	0	0	0	1	0	0	1	0	0	1	0	0	0	1	0	0	0	1	1	0	1	0	0	2	1	1	0	0	0	0	0	0	0	3	0	36.2	35.8	0	0	0	0	0
0	1	0	0	83.8117	1	0	0	0	0	1	0	0	0	0	0	0	0	0	0	0	0	0	0	0	1	0	1	1	0	2	1	0	0	0	0	1	0	0	0	42	0	0	0	0	0	0	0	0
0	1	0	0	28.014	1	0	0	0	0	1	0	0	0	0	0	0	0	0	0	0	0	0	0	0	1	0	1	1	1	1	1	1	0	0	0	1	0	0	0	34	0	0	0	0	0	0	0	0
0	1	0	0	26.9444	0	0	0	0	0	1	0	0	1	0	0	0	0	0	0	0	0	0	0	0	1	0	1	0	0	1	1	1	0	0	0	1	0	0	0	74	0	0	0	0	0	0	0	0
1	1	0	0	44.9934	1	0	0	0	0	0	1	0	1	0	1	1	0	0	0	1	1	0	0	0	0	0	1	1	1	2	0	0	0	0	0	0	0	0	0	25	1	38.9	36.2	0	0	0	0	0
0	1	0	0	83.5072	1	0	1	0	0	0	1	0	0	0	0	0	0	1	0	0	0	0	1	0	1	0	1	1	0	1	1	1	0	0	0	1	0	0	0	8	0	0	0	0	0	0	0	0
0	1	0	0	49.3178	0	0	0	0	0	1	0	0	0	0	1	0	0	1	0	0	0	0	0	0	0	0	0	1	1	2	1	1	0	0	0	0	0	0	0	37	0	0	0	0	0	0	0	0
1	0	0	0	78.9639	0	1	0	1	0	0	0	0	0	0	1	0	0	0	0	0	0	0	0	0	0	0	0	0	0	1	1	1	1	0	1	0	0	0	0	15	0	36.9	36	0	0	0	1	1
1	1	0	0	75.2347	1	0	0	0	0	1	1	0	0	1	0	1	0	0	0	0	0	0	0	0	1	0	1	0	0	2	0	1	0	0	0	1	0	0	0	8	0	37.1	35.6	0	0	0	0	0
1	1	0	0	80.3502	1	0	1	0	0	0	0	0	0	0	0	0	0	0	0	0	0	0	0	0	1	0	1	1	0	1	1	1	0	0	0	1	0	0	0	33	0	37.1	35.6	0	0	0	0	0
0	1	0	0	81.8288	1	0	0	1	0	1	1	0	0	1	0	0	0	0	0	0	0	0	0	0	1	0	1	1	0	1	1	1	0	0	0	1	0	0	0	30	0	0	0	0	0	0	0	0
1	1	0	0	46.7207	0	0	0	0	0	1	1	0	0	1	1	1	0	0	0	0	0	0	0	0	1	0	1	1	0	1	1	1	0	0	0	1	0	0	0	4	1	39.2	39.2	0	0	0	0	0
1	1	0	0	83.7817	1	0	1	1	0	1	0	0	0	0	0	0	0	0	0	0	0	0	0	0	1	0	1	1	0	1	1	1	0	0	1	1	0	0	0	31	0	36.2	35.6	0	0	0	0	0
0	1	0	0	80.5949	1	0	0	0	0	0	0	0	0	0	0	0	0	0	0	0	0	0	0	0	0	0	0	1	0	2	0	0	0	0	0	0	0	0	0	59	0	0	0	0	0	0	0	0
0	1	0	0	59.8609	1	0	0	0	0	1	0	0	0	0	0	0	0	1	0	0	0	0	0	0	0	0	0	1	0	2	1	1	0	0	0	0	0	0	0	23	0	0	0	0	0	0	0	0
1	1	0	0	69.0396	1	0	0	0	0	1	0	0	1	0	0	0	0	1	0	0	0	0	1	0	1	0	1	1	0	1	1	1	0	0	0	1	0	0	0	67	0	35	35	0	0	0	0	0
0	1	0	0	24.8386	0	0	0	0	0	1	0	0	0	0	0	0	0	0	0	0	0	0	0	0	0	0	0	1	0	2	0	0	0	0	0	0	0	0	0	32	0	0	0	0	0	0	0	0
0	1	0	0	81.367	1	0	0	0	0	1	0	0	0	0	0	1	0	0	0	0	0	0	0	0	0	0	0	1	0	2	1	0	0	0	0	0	0	0	0	65	0	0	0	0	0	0	0	0
0	1	0	0	58.3593	1	0	0	0	0	1	1	0	0	1	0	0	0	1	0	0	0	0	0	0	1	0	1	1	0	1	1	1	0	0	0	1	0	0	0	61	0	0	0	0	0	0	0	0
1	1	0	0	55.6804	1	0	0	0	0	1	0	0	1	0	0	0	0	0	0	0	0	0	0	0	1	0	1	1	0	1	1	1	0	0	0	0	0	0	0	15	0	35	35	0	0	0	0	0
0	1	0	0	87.8182	0	1	0	1	0	1	0	0	0	0	0	1	0	0	0	0	0	0	0	0	0	0	0	0	1	2	1	1	1	0	0	0	0	0	0	39	0	0	0	0	0	0	0	0
0	1	0	0	25.579	1	0	0	0	0	1	0	0	0	0	0	0	0	1	0	0	0	0	0	0	1	0	1	1	0	4	1	1	0	0	0	0	0	0	0	60	0	0	0	0	0	0	0	0
0	1	0	0	83.8094	1	0	0	1	0	1	0	0	0	0	1	1	1	0	0	0	0	0	0	0	1	0	1	0	1	2	0	0	0	0	0	0	0	0	0	60	0	0	0	0	0	0	0	0
0	1	0	0	57.4574	1	0	0	1	0	0	0	0	1	0	0	0	0	1	0	0	0	0	0	0	0	0	0	1	0	2	0	0	0	0	0	0	0	0	0	50	0	0	0	0	0	0	0	0
1	1	0	0	73.0893	0	1	0	0	0	0	0	0	0	0	1	0	0	1	0	0	0	0	0	0	1	0	1	1	0	2	0	0	1	0	0	1	0	0	0	15	0	37.1	35.8	0	0	0	1	0
0	1	0	0	39.8177	1	1	0	0	0	1	0	0	0	0	0	1	0	0	0	0	0	0	0	1	1	0	1	0	0	1	1	1	0	0	0	1	0	0	0	35	0	0	0	0	0	0	0	0
0	1	0	0	44.6839	1	0	0	0	0	1	1	0	0	0	0	1	0	0	0	0	0	0	0	0	1	0	1	1	0	1	1	1	0	0	0	1	0	0	0	64	0	0	0	0	0	0	0	0
0	1	0	0	48.8515	0	0	0	0	0	0	0	0	0	0	0	1	0	1	0	0	0	0	0	0	0	0	0	1	0	2	1	0	0	0	0	0	0	0	0	20	0	0	0	0	0	0	0	0
0	1	0	0	85.6221	0	1	0	0	0	0	0	0	0	0	1	0	0	0	0	0	0	0	1	0	1	0	1	0	0	2	0	0	0	0	0	0	0	0	0	46	0	0	0	0	0	0	0	0
1	0	0	0	78.9616	1	0	0	0	0	0	1	1	0	0	0	1	0	0	0	0	0	0	0	0	0	0	0	1	1	2	0	0	1	0	0	0	0	0	0	7	0	36.6	35	0	0	0	1	1
0	1	0	0	74.5428	1	0	0	0	0	1	0	0	1	0	1	1	1	0	0	0	0	0	1	0	1	0	1	1	0	2	0	0	0	0	1	1	0	0	0	22	0	0	0	0	0	0	0	0
0	1	0	0	37.8617	0	0	0	0	0	0	0	0	0	0	0	0	0	1	0	0	0	0	0	0	0	0	0	1	0	2	0	0	1	0	0	0	0	0	0	63	0	0	0	0	0	0	0	0
1	1	0	0	80.5101	1	0	0	0	0	1	0	0	0	0	0	1	0	0	0	0	0	0	0	0	1	0	1	1	0	2	1	1	0	0	0	0	0	0	0	15	0	37.5	36.2	0	0	0	0	0
0	1	0	0	61.8051	1	0	0	0	0	1	1	0	0	0	1	0	0	0	0	0	0	0	1	0	1	0	1	1	0	1	1	1	0	0	0	1	0	0	0	33	0	0	0	0	0	0	0	0
0	1	0	0	98.0597	1	1	0	0	1	1	0	0	0	0	0	0	0	0	0	0	0	0	0	0	1	0	1	1	0	2	1	1	0	0	0	1	0	0	0	23	0	0	0	0	0	0	0	0
1	1	0	0	65.1315	0	0	0	0	0	0	0	0	0	0	0	0	0	1	0	1	1	0	1	0	0	0	1	1	0	1	1	1	1	0	0	0	0	0	0	8	1	38.2	35.6	0	0	0	0	0
0	1	0	0	55.0938	0	0	0	0	0	1	1	0	0	0	0	0	0	1	0	0	0	0	0	0	1	0	1	1	1	1	1	1	0	0	0	1	0	0	0	52	0	0	0	0	0	0	0	0
0	1	0	0	89.1348	1	1	0	0	0	1	1	0	0	0	1	0	0	0	0	0	0	0	0	0	1	0	1	0	1	2	0	0	0	0	0	0	0	0	0	45	0	0	0	0	0	0	0	0
1	1	0	0	78.8066	0	0	0	0	0	0	1	1	1	0	1	1	0	0	0	0	1	0	0	0	1	0	1	1	0	2	1	1	0	0	0	1	0	0	0	22	0	37.2	35.6	0	0	0	0	0
0	1	0	0	65.7131	1	0	1	1	0	1	1	0	0	0	1	1	0	0	0	0	0	0	0	1	1	0	1	1	1	1	1	1	1	0	0	1	1	0	0	46	0	0	0	0	0	0	0	0
0	1	0	0	68.0376	1	0	0	0	0	1	0	0	0	0	0	1	0	0	0	0	0	0	0	0	1	0	1	1	0	1	1	1	0	0	0	1	0	0	0	31	0	0	0	0	0	0	0	0
1	1	0	0	82.4447	0	1	1	0	0	1	1	1	0	0	1	0	0	0	0	0	0	0	1	0	1	0	1	1	0	2	0	0	1	0	0	0	0	0	0	2	0	36.8	35.5	0	0	0	1	0
1	1	0	0	68.4871	0	0	0	1	0	1	0	0	0	1	1	0	1	0	0	1	1	0	1	0	1	0	1	1	0	1	1	1	0	0	0	0	0	0	0	5	1	40	37.2	0	0	0	0	0
0	1	0	0	59.7894	1	0	0	0	0	1	0	0	0	0	0	0	0	0	0	0	0	0	1	0	0	0	1	1	0	2	0	0	0	0	0	0	0	0	0	62	0	0	0	0	0	0	0	0
0	1	0	0	55.9709	0	0	0	0	0	0	1	0	0	0	1	0	0	1	0	0	0	0	0	0	0	0	0	0	0	2	1	1	0	0	0	1	0	0	0	100	0	0	0	0	0	0	0	0
1	1	0	0	73.0913	1	0	0	0	0	1	0	0	1	0	0	1	0	0	0	0	0	0	0	0	1	0	1	0	0	2	1	0	0	0	0	0	0	0	0	38	0	37	36.9	0	0	0	0	0
1	1	0	0	73.4987	1	0	0	0	0	0	0	0	1	0	1	0	0	0	0	0	0	0	0	0	0	1	1	0	0	2	0	1	0	0	0	0	0	0	0	42	0	32.6	32.6	0	0	0	0	0
1	1	0	0	40.3727	1	0	0	0	0	1	0	0	0	0	0	0	0	1	0	0	0	0	0	0	0	1	1	1	0	2	0	0	0	0	0	0	0	0	0	24	0	37	36.5	0	0	0	0	0
1	1	0	0	81.7031	0	0	0	0	0	1	0	0	0	0	0	1	0	0	0	0	0	0	0	0	1	0	1	1	0	2	0	0	0	0	0	0	0	0	0	21	0	37.1	35.8	0	0	0	0	0
1	1	0	0	66.5201	1	0	0	0	0	1	1	0	0	1	1	0	0	1	0	0	0	0	1	0	1	0	1	0	0	3	0	1	0	0	0	1	0	0	0	5	0	37	32.7	0	0	0	0	0
0	1	0	0	76.1523	1	0	0	0	0	1	0	0	0	0	0	0	0	0	0	0	0	1	0	1	1	0	1	0	1	1	1	1	0	0	0	1	0	0	0	30	0	0	0	0	0	0	0	0
0	1	0	0	67.7835	1	1	0	0	0	1	0	0	0	0	1	1	0	1	0	0	0	0	0	0	1	0	1	1	0	1	1	1	1	0	0	1	0	0	0	65	0	0	0	0	0	0	0	0
0	1	0	0	71.2834	0	0	0	0	0	1	0	0	0	0	0	0	0	0	0	0	0	0	0	0	1	0	1	1	1	2	0	0	0	0	0	0	0	0	0	32	0	0	0	0	0	0	0	0
0	1	0	0	77.5533	0	0	1	0	0	1	0	0	0	1	1	1	0	0	0	0	0	0	0	0	1	0	1	0	1	1	1	1	0	0	0	1	0	0	0	420	0	0	0	0	0	0	0	0
0	1	0	0	58.8179	0	1	0	1	0	0	0	0	0	0	1	0	0	0	0	0	0	0	0	0	1	0	1	1	1	2	0	0	0	0	0	0	0	0	0	58	0	0	0	0	0	0	0	0
1	1	0	0	63.8462	1	0	0	0	0	0	0	0	0	0	0	1	0	1	0	0	0	0	1	0	0	1	1	1	0	2	0	0	0	0	0	1	0	0	0	40	0	37.1	35.6	0	0	0	0	0
0	1	0	0	63.0003	1	0	0	0	0	0	0	0	0	0	0	0	0	1	0	0	0	0	0	0	0	0	0	1	0	2	0	0	0	0	0	0	0	0	0	35	0	0	0	0	0	0	0	0
0	1	0	0	80.737	0	0	0	0	0	1	0	0	0	0	1	0	0	0	0	0	0	0	0	0	0	0	0	1	1	2	0	0	0	0	0	0	0	0	0	78	0	0	0	0	0	0	0	0
0	1	0	0	89.6527	0	0	1	0	0	0	0	0	0	0	0	0	0	1	0	0	0	0	0	0	1	0	1	0	0	2	1	0	0	0	0	0	0	0	0	64	0	0	0	0	0	0	0	0
1	1	0	0	75.0007	0	0	0	0	0	1	0	0	0	0	0	0	0	0	0	0	0	0	0	0	1	1	1	1	0	2	0	0	0	0	0	0	0	0	0	17	1	40.5	35.4	0	0	0	0	0
0	1	0	0	68.197	1	0	0	1	0	1	1	0	0	0	0	1	1	0	0	0	0	0	1	0	1	0	1	1	0	1	1	1	0	0	0	1	0	0	0	30	0	0	0	0	0	0	0	0
0	1	0	0	46.498	1	0	0	0	0	1	0	0	0	0	0	0	0	0	0	0	0	0	0	0	1	0	1	0	0	1	1	1	0	0	0	0	0	0	0	12	0	0	0	0	0	0	0	0
0	1	0	0	55.693	1	0	0	1	0	1	1	0	0	0	0	0	0	1	0	0	0	0	0	0	1	0	1	1	0	2	0	0	0	0	0	0	0	0	0	62	0	0	0	0	0	0	0	0
1	1	0	0	48.6094	0	0	0	0	0	1	1	1	1	0	0	0	0	0	0	0	1	0	0	0	1	0	1	0	0	1	1	1	0	0	0	0	0	0	0	5	0	36.2	35.4	0	0	0	0	0
0	1	0	0	87.6555	0	0	0	1	0	1	0	0	0	0	0	0	0	0	0	0	0	0	0	0	1	0	1	1	0	1	1	1	0	0	0	1	0	0	0	125	0	0	0	0	0	0	0	0
0	1	0	0	87.6867	0	0	0	0	0	1	0	0	0	0	0	1	0	1	0	0	0	0	0	0	1	0	1	0	0	1	1	1	0	0	0	1	0	0	0	27	0	0	0	0	0	0	0	0
1	1	0	0	79.5342	1	0	0	1	0	1	1	1	0	0	0	1	0	0	0	0	0	0	0	0	1	1	1	1	1	2	0	0	1	0	0	0	0	0	0	20	1	38.2	35.8	0	0	0	0	0
0	1	0	0	76.592	1	0	1	0	0	0	0	0	0	0	0	1	1	0	0	0	0	0	0	0	0	0	0	1	1	2	0	0	0	0	0	0	0	0	0	45	0	0	0	0	0	0	0	0
1	1	0	0	90.506	1	0	0	0	0	1	0	0	0	0	0	1	0	0	0	0	0	0	0	0	1	1	1	1	0	2	1	0	0	0	0	0	0	0	0	33	0	35.2	35.2	0	0	0	0	0
0	1	0	0	64.9416	0	0	0	0	0	1	0	0	0	0	0	0	0	0	0	0	0	0	0	0	1	0	1	1	0	1	1	1	0	1	0	0	0	0	0	63	0	0	0	0	0	0	0	0
0	1	0	0	40.1435	0	0	0	0	0	1	1	0	0	0	1	0	0	0	0	0	0	0	0	0	1	0	1	0	1	1	1	1	0	0	0	0	0	0	0	112	0	0	0	0	0	0	0	0
0	1	0	0	58.0401	1	0	0	0	0	1	1	1	1	0	0	0	0	0	0	0	0	0	0	0	1	0	1	1	1	1	1	1	0	1	1	1	0	0	0	31	0	0	0	0	0	0	0	0
1	1	0	0	26.4094	1	0	0	0	0	1	1	0	0	0	0	1	1	1	0	0	0	0	0	0	1	0	1	1	0	1	1	1	0	1	0	1	0	0	0	2	0	37.1	36	0	0	0	0	0
0	1	0	0	86.7209	0	0	0	0	0	1	0	0	0	0	0	0	0	0	0	0	0	0	0	0	1	0	1	1	0	4	0	0	0	1	1	1	0	0	0	25	0	0	0	0	0	0	0	0
0	1	0	0	66.7231	0	0	0	0	0	1	1	0	0	0	0	0	0	1	0	0	0	0	1	0	1	0	1	0	0	1	1	1	0	1	0	1	0	0	0	32	0	0	0	0	0	0	0	0
0	1	0	0	80.2175	0	0	0	1	0	0	0	0	0	0	0	0	0	0	0	0	0	0	0	0	0	0	0	0	0	4	1	1	0	1	1	1	0	0	0	102	0	0	0	0	0	0	0	0
0	1	0	0	57.26	1	0	0	0	1	1	0	0	1	0	1	0	0	0	0	1	0	0	1	0	0	1	1	1	1	2	1	0	0	1	0	1	0	0	0	50	0	0	0	0	0	0	0	0
0	1	0	0	37.4112	1	1	0	0	0	1	0	0	0	0	0	0	0	1	0	0	0	0	0	0	0	0	0	0	1	2	1	0	0	1	1	1	0	0	0	47	0	0	0	0	0	0	0	0
0	1	0	0	53.0806	1	0	0	0	0	1	0	0	1	0	0	0	0	0	0	0	0	0	0	0	1	0	1	0	1	1	1	1	0	1	0	1	0	0	0	5	0	0	0	0	0	0	0	0
1	1	0	0	68.9811	0	1	0	1	0	0	0	0	0	0	0	0	0	0	0	0	0	0	0	0	0	0	0	0	1	2	1	0	0	1	1	1	0	0	0	25	1	38.1	35.7	0	0	0	0	0
0	1	0	0	46.2057	1	0	0	0	0	1	0	0	0	0	0	1	0	1	0	0	0	0	1	0	0	0	1	0	0	2	1	0	0	1	1	1	0	0	0	45	0	0	0	0	0	0	0	0
0	1	0	0	69.2925	0	0	0	0	0	0	0	0	1	0	1	0	0	0	0	0	0	0	0	0	1	0	1	1	0	2	1	0	0	1	1	1	0	0	0	111	0	0	0	0	0	0	0	0
0	1	0	0	66.0725	1	0	0	1	0	1	1	0	0	0	1	0	0	1	0	0	1	0	0	0	1	0	1	1	0	1	1	1	0	1	0	1	0	0	0	34	0	0	0	0	0	0	0	0
0	1	0	0	79.9372	0	0	0	0	0	1	1	1	0	0	0	0	0	1	0	0	0	0	0	0	1	0	1	1	0	1	1	1	0	1	0	1	0	0	0	32	0	0	0	0	0	0	0	0
0	1	0	0	82.5043	1	0	0	1	0	0	0	0	0	0	0	0	0	0	0	0	0	0	1	0	1	0	1	0	0	4	1	1	0	1	0	1	0	0	0	85	0	0	0	0	0	0	0	0
0	1	0	0	43.2404	1	0	0	0	0	1	1	0	1	0	0	1	0	0	0	0	0	0	0	0	1	0	1	0	1	1	1	1	0	1	1	1	0	0	0	80	0	0	0	0	0	0	0	0
0	1	0	0	63.4119	0	1	1	0	0	1	1	1	0	0	0	0	1	0	0	0	0	0	0	0	1	0	1	1	1	2	1	0	0	1	0	1	0	0	0	80	0	0	0	0	0	0	0	0
0	1	0	0	71.8194	0	0	0	0	1	1	1	0	0	0	0	0	1	0	0	0	0	0	0	0	1	0	1	1	1	1	1	1	0	1	1	1	0	0	0	32	0	0	0	0	0	0	0	0
1	1	0	0	82.1305	0	0	0	1	0	1	1	1	0	0	1	0	0	1	0	0	0	0	0	0	1	0	1	1	0	1	1	1	0	1	1	1	0	0	0	9	0	37.1	35.6	0	0	0	0	0
1	1	0	0	65.1027	1	0	0	0	1	1	0	0	0	0	1	0	1	1	0	0	0	0	0	0	1	0	1	1	1	2	0	0	0	1	0	1	0	0	0	28	0	37.1	35.6	0	0	0	0	0
0	1	0	0	65.5169	1	0	0	0	0	0	0	0	0	0	0	0	0	0	0	0	0	0	0	0	0	0	0	1	0	2	0	0	0	1	0	1	0	0	0	84	0	0	0	0	0	0	0	0
0	1	0	0	41.1883	1	0	0	1	0	0	0	0	0	0	0	1	0	1	0	0	0	0	0	0	0	0	0	1	0	2	0	0	0	1	1	1	0	0	0	87	0	0	0	0	0	0	0	0
1	1	0	0	84.1383	1	0	0	1	0	1	1	0	0	0	0	1	0	0	0	0	0	0	0	0	1	0	1	0	0	2	0	0	0	1	0	1	0	0	0	14	0	37	35.2	0	0	0	0	0
1	1	0	0	49.8044	1	0	0	0	0	0	1	1	0	0	0	1	1	0	0	0	0	0	0	1	0	0	1	1	1	2	0	0	0	1	1	1	0	0	0	30	1	39.5	36.5	0	0	0	0	0
0	1	0	0	69.0549	1	1	0	0	1	1	0	0	0	0	0	1	0	1	0	0	0	0	0	0	1	0	1	1	0	2	1	1	0	1	1	1	0	0	0	45	0	0	0	0	0	0	0	0
1	1	0	0	79.9715	0	0	0	0	0	1	0	0	0	0	0	0	0	1	0	0	0	0	0	0	0	0	0	0	0	4	0	0	0	1	1	1	0	0	0	17	1	39.2	37.2	0	0	0	0	0
0	1	0	0	74.0266	1	0	0	0	0	0	0	0	0	0	0	0	0	1	0	0	0	0	0	0	0	0	0	1	0	2	0	0	0	1	1	1	0	0	0	40	0	0	0	0	0	0	0	0
1	1	0	0	64.4207	0	0	0	0	0	1	0	0	0	0	0	0	0	1	0	0	0	0	0	0	1	0	1	0	0	2	0	0	0	1	1	1	0	0	0	44	0	36.8	36.8	0	0	0	0	0
0	1	0	0	74.2977	0	1	0	0	0	1	0	0	0	0	0	0	0	0	0	0	0	0	0	0	0	0	0	1	0	2	1	0	0	1	0	1	0	0	0	41	0	0	0	0	0	0	0	0
0	1	0	0	85.0035	1	0	0	0	0	1	0	0	1	0	0	0	0	0	0	0	0	0	0	0	1	0	1	0	0	2	0	0	0	1	1	1	0	0	0	55	0	0	0	0	0	0	0	0
0	1	0	0	70.1296	1	0	0	0	0	1	0	0	0	0	1	0	0	0	0	0	0	0	0	0	1	0	1	1	1	2	0	0	1	1	0	1	0	0	0	31	0	0	0	0	0	0	0	0
0	1	0	0	75.1005	0	0	0	0	0	1	1	0	0	1	0	0	1	0	0	0	0	0	0	0	1	0	1	0	0	2	1	1	1	1	1	1	0	0	0	16	0	0	0	0	0	0	0	0
1	1	0	0	76.5756	0	0	0	0	0	1	1	0	1	0	0	1	0	0	0	1	0	0	1	0	1	0	1	1	1	2	0	0	0	1	0	1	0	0	0	18	1	39.5	36.2	0	0	0	0	0
0	1	0	0	70.6812	1	1	0	0	0	1	1	0	0	0	1	0	0	0	0	0	0	0	0	0	1	0	1	1	1	2	0	0	0	1	1	1	0	0	0	75	0	0	0	0	0	0	0	0
0	1	0	0	48.2659	1	0	0	0	0	1	0	0	1	0	0	0	0	0	0	0	0	0	0	0	1	0	1	1	0	1	1	1	0	1	0	1	0	0	0	9	0	0	0	0	0	0	0	0
0	1	0	0	53.0308	1	1	1	0	0	0	1	1	0	0	1	0	0	0	0	0	0	0	0	0	0	0	0	0	0	2	0	0	1	1	1	1	0	0	0	32	0	0	0	0	0	0	0	0
0	1	0	0	80.0722	1	0	1	1	0	1	0	0	0	0	0	0	0	0	0	0	0	0	0	0	0	0	0	0	0	1	1	1	1	1	1	1	0	0	0	75	0	0	0	0	0	0	0	0
1	1	0	0	53.2075	0	0	0	0	0	1	1	1	0	0	1	1	0	0	0	0	0	0	0	0	1	0	1	1	0	2	0	0	0	1	1	1	0	0	0	5	0	37	36	0	0	0	1	1
0	1	0	0	52.6062	1	0	0	0	0	1	0	0	0	0	1	0	0	0	0	0	0	0	0	0	1	0	1	0	1	1	1	1	1	1	1	1	0	0	0	51	0	0	0	0	0	0	0	0
0	1	0	0	84.3592	1	0	1	0	1	1	0	1	0	0	0	0	0	0	0	0	0	0	0	0	1	0	1	1	0	1	1	1	0	1	1	1	0	0	0	47	0	0	0	0	0	0	0	0
1	1	0	0	72.201	1	1	1	0	0	1	1	0	0	1	1	0	0	0	0	0	0	0	0	0	1	0	1	0	0	1	1	1	0	1	0	1	0	0	0	3	1	39.2	37.6	0	0	0	0	0
0	1	0	0	76.007	1	0	0	0	0	1	1	0	0	0	0	1	0	0	0	0	0	0	0	0	1	0	1	0	0	2	1	1	0	1	1	1	0	0	0	182	0	0	0	0	0	0	0	0
0	1	0	0	62.5992	1	0	0	0	0	1	0	0	0	0	0	0	0	0	0	0	0	0	0	0	0	0	0	0	0	2	0	0	0	1	1	1	0	0	0	155	0	0	0	0	0	0	0	0
1	1	0	0	76.105	0	0	0	0	0	1	1	0	0	0	1	1	0	0	0	1	1	0	1	0	1	0	1	0	1	1	1	1	0	1	1	1	0	0	0	31	1	39.6	36.3	0	0	0	0	0
1	1	0	0	71.7226	0	0	0	0	0	1	0	0	1	0	0	0	0	0	0	0	0	0	0	0	1	0	1	0	0	1	1	1	0	1	1	1	0	0	0	28	0	37.5	35.8	0	0	0	0	0
0	1	0	0	75.7266	1	1	0	0	0	1	1	0	0	1	0	1	0	0	0	0	0	0	0	1	1	0	1	1	0	2	0	0	0	1	0	1	0	0	0	57	0	0	0	0	0	0	0	0
1	1	0	0	56.3493	1	0	0	0	1	0	0	0	1	0	0	0	0	0	0	0	0	0	0	0	0	1	1	0	0	2	1	1	0	1	1	1	0	0	0	15	0	35	34	0	0	0	0	0
0	1	0	0	60.5744	1	1	0	0	0	1	1	0	0	0	1	1	0	0	0	0	0	0	0	0	0	0	0	1	0	2	1	0	1	1	1	1	0	0	0	96	0	0	0	0	0	0	0	0
1	1	0	0	79.0529	0	0	0	0	0	1	0	0	0	0	1	0	0	0	0	0	0	0	0	0	0	0	0	1	0	1	1	1	1	1	0	1	0	0	0	23	0	37.6	36.2	0	0	0	1	0
0	1	0	0	75.0845	1	0	0	0	0	0	0	0	0	0	0	0	0	0	0	0	0	0	0	0	0	0	0	0	0	2	0	0	0	1	0	1	0	0	0	55	0	0	0	0	0	0	0	0
0	1	0	0	86.1372	1	0	1	0	1	1	1	0	0	1	1	0	0	0	0	0	0	0	0	0	1	0	1	0	1	1	1	1	0	1	1	1	0	0	0	51	0	0	0	0	0	0	0	0
1	1	0	0	92.1178	1	1	0	0	0	1	0	0	0	0	0	1	0	0	0	0	0	0	0	0	1	0	1	1	1	1	1	1	0	1	1	1	0	0	0	11	0	37.1	35.6	0	0	0	0	0
1	1	0	0	69.9993	0	0	0	0	0	1	1	0	0	1	0	1	0	0	0	0	0	0	0	0	0	0	0	1	1	2	0	0	0	1	0	1	0	0	0	18	0	37.2	35.2	0	0	0	0	0
0	1	0	0	70.5221	0	0	0	1	0	0	0	0	0	0	0	0	0	0	0	0	0	0	1	0	0	0	1	1	0	2	0	0	0	1	1	1	0	0	0	45	0	0	0	0	0	0	0	0
0	1	0	0	64.6479	1	1	1	0	0	1	1	0	0	0	0	0	0	0	0	0	0	0	0	0	0	0	0	0	0	2	0	0	0	1	1	1	0	0	0	65	0	0	0	0	0	0	0	0
0	1	0	0	73.5752	1	1	0	0	1	1	1	1	1	0	0	0	0	0	0	0	0	0	0	0	0	0	0	0	0	2	1	1	0	1	1	1	0	0	0	120	0	0	0	0	0	0	0	0
0	1	0	0	49.5187	1	0	0	0	0	1	1	1	0	0	1	1	0	0	0	0	0	0	0	0	1	0	1	0	0	2	1	1	1	1	1	1	0	0	0	25	0	0	0	0	0	0	0	0
0	1	0	0	75.1352	0	0	0	0	1	1	1	0	0	0	0	0	0	0	0	0	0	0	1	0	0	0	1	1	0	1	1	1	0	1	0	1	0	0	0	49	0	0	0	0	0	0	0	0
1	1	0	0	61.9377	1	0	0	0	1	1	0	0	0	0	0	1	0	0	0	0	0	0	0	0	1	0	1	1	1	1	1	1	0	1	0	1	0	0	0	8	1	40	38	0	0	0	0	0
1	1	0	0	38.8288	0	0	0	0	0	0	0	0	0	0	0	0	0	1	0	1	1	0	0	0	0	0	1	1	0	2	0	0	0	1	0	1	0	0	0	70	0	37.1	34.3	0	0	0	0	0
0	1	0	0	90.746	1	0	0	0	0	1	1	0	0	0	1	1	0	0	0	0	0	0	0	0	0	0	0	1	0	2	0	0	0	1	1	1	0	0	0	90	0	0	0	0	0	0	0	0
1	1	0	0	68.2264	0	0	0	1	0	1	0	0	0	0	0	1	1	1	0	0	0	0	0	0	1	0	1	1	0	2	0	0	0	1	0	1	0	0	0	17	0	36.5	35	0	0	0	0	0
1	1	0	0	71.5018	1	0	0	0	0	0	1	0	0	0	1	0	0	0	0	1	0	0	0	0	0	0	1	1	0	2	0	0	0	1	0	1	0	0	0	5	1	38.1	35.9	0	0	0	1	0
1	1	0	0	73.0732	0	1	0	0	0	1	1	1	1	0	1	0	0	0	0	0	0	0	0	0	1	0	1	1	1	2	0	1	0	1	0	1	0	0	0	25	0	37	36.6	0	0	0	0	0
1	1	0	0	53.5153	0	0	0	0	0	0	0	0	0	0	0	0	0	1	0	0	0	0	1	0	0	0	1	0	1	2	0	0	0	1	0	1	0	0	0	100	0	37.1	35.6	0	0	0	0	0
0	1	0	0	44.0042	1	0	0	0	0	0	0	0	0	0	0	0	0	1	0	0	0	0	0	0	0	0	0	0	0	2	0	0	0	1	1	1	0	0	0	31	0	0	0	0	0	0	0	0
0	1	0	0	87.3706	1	1	0	0	0	1	1	0	0	0	0	0	0	0	0	0	0	0	0	0	1	0	1	1	0	1	1	1	0	1	0	1	0	0	0	17	0	0	0	0	0	0	0	0
0	1	0	0	26.0283	0	1	0	0	0	1	0	0	1	0	0	0	0	0	0	0	0	0	1	0	0	0	1	1	0	1	1	1	0	1	0	1	0	0	0	55	0	0	0	0	0	0	0	0
0	1	0	0	64.7557	0	0	0	0	0	0	0	0	0	0	0	0	0	0	0	0	0	0	0	0	0	0	0	1	1	2	1	1	0	1	1	1	0	0	0	45	0	0	0	0	0	0	0	0
0	1	0	0	77.1655	1	0	0	0	0	1	1	0	0	0	1	0	0	1	0	0	0	0	1	0	1	0	1	1	0	1	1	1	0	1	1	1	0	0	0	45	0	0	0	0	0	0	0	0
1	1	0	0	73.8647	1	0	0	0	1	1	1	0	0	0	1	1	0	0	0	1	1	1	0	0	1	0	1	1	0	2	0	0	0	1	0	1	0	0	0	20	0	36.4	33.7	0	0	0	0	0
0	1	0	0	66.7327	0	0	0	0	1	1	1	0	0	1	1	1	0	1	0	0	0	0	0	0	0	0	0	1	0	2	0	0	0	1	0	1	0	0	0	20	0	0	0	0	0	0	0	0
1	1	0	0	36.0518	1	0	0	0	0	1	0	0	0	0	0	0	0	0	0	0	0	0	0	0	0	0	0	1	0	2	0	0	0	1	0	1	0	0	0	12	0	37.8	36.6	0	0	0	0	0
0	1	0	0	61.2789	1	0	0	0	0	1	1	0	0	0	1	0	0	1	0	0	0	0	0	0	1	0	1	1	0	1	1	1	0	1	0	1	0	0	0	15	0	0	0	0	0	0	0	0
0	1	0	0	92.0369	0	0	0	0	0	0	0	0	0	0	1	0	0	0	0	0	0	0	0	0	0	0	0	0	1	2	0	0	0	1	1	1	0	0	0	28	0	0	0	0	0	0	0	0
0	1	0	0	66.8326	1	0	0	0	0	0	0	0	1	0	0	0	0	0	0	0	0	0	1	0	0	0	1	0	0	2	0	0	0	1	0	1	0	0	0	45	0	0	0	0	0	0	0	0
0	1	0	0	66.5923	1	0	1	0	0	1	0	0	0	0	0	0	0	0	0	0	0	0	0	0	1	0	1	1	1	2	1	0	0	1	0	1	0	0	0	100	0	0	0	0	0	0	0	0
1	1	0	0	51.9666	0	0	0	0	0	0	1	0	0	0	1	0	0	0	0	1	1	0	1	0	1	0	1	1	0	2	0	0	0	1	1	1	0	0	0	10	0	36.8	35	0	0	0	0	0
1	0	0	0	75.0594	1	0	0	1	0	1	0	0	0	0	0	1	0	1	0	0	0	0	1	0	1	0	1	0	1	1	1	1	1	1	0	0	0	0	0	4	1	38.5	36.6	0	0	0	0	0
0	1	0	0	76.8018	0	0	0	0	0	1	1	1	0	1	1	0	1	0	0	0	0	0	1	0	1	0	1	1	0	2	0	1	0	1	1	1	0	0	0	58	0	0	0	0	0	0	0	0
0	1	0	0	75.9122	1	0	0	0	0	1	0	0	1	0	0	0	0	0	0	0	0	0	0	0	1	0	1	1	0	1	1	1	1	1	1	1	0	0	0	85	0	0	0	0	0	0	0	0
0	1	0	0	80.4134	1	0	1	0	0	1	0	0	0	0	0	0	0	0	0	0	0	0	0	1	0	0	1	1	0	1	1	1	1	1	1	1	0	0	0	90	0	0	0	0	0	0	0	0
1	1	0	0	79.1698	1	0	0	0	0	1	0	0	0	0	0	1	0	0	0	0	0	0	1	0	1	1	1	1	0	2	0	1	0	1	1	1	0	0	0	21	0	34.1	34.1	0	0	0	0	0
0	1	0	0	75.3366	0	0	0	1	0	1	0	0	0	0	0	1	0	0	0	0	0	1	1	1	1	0	1	0	0	2	0	1	0	1	1	1	0	0	0	64	0	0	0	0	0	0	0	0
0	1	0	0	74.0128	1	1	0	0	0	0	1	1	0	0	1	0	0	0	0	0	0	0	0	0	0	0	0	1	0	2	0	0	0	1	0	0	0	0	0	45	0	0	0	0	0	0	0	0
0	1	0	0	25.6947	1	0	0	0	0	1	0	0	1	0	0	0	0	0	0	0	0	0	0	0	1	0	1	1	0	2	0	0	0	1	1	1	0	0	0	38	0	0	0	0	0	0	0	0
1	1	0	0	43.0644	0	0	0	0	0	1	1	0	1	0	0	0	0	0	0	0	1	0	1	0	0	0	1	1	0	2	1	0	0	1	0	1	0	0	0	39	0	36.6	35	0	0	0	0	0
0	1	0	0	49.9994	0	0	0	1	0	1	1	0	1	0	0	1	0	1	0	0	0	0	0	0	1	0	1	1	1	1	1	1	0	1	0	1	0	0	0	40	0	0	0	0	0	0	0	0
1	1	0	0	72.6332	1	1	0	0	1	1	1	1	0	0	0	1	0	0	0	0	1	0	0	0	1	0	1	1	0	1	1	1	0	1	1	1	0	0	0	17	1	38	35.8	0	0	0	0	0
0	1	0	0	82.3027	0	1	0	0	0	1	0	0	0	0	0	0	1	0	0	0	0	0	0	0	1	0	1	1	0	1	1	1	0	1	0	1	0	0	0	41	0	0	0	0	0	0	0	0
0	1	0	0	87.6923	1	0	0	0	0	0	0	0	0	0	0	0	0	0	0	0	0	0	0	0	0	0	0	0	1	2	1	0	0	1	0	1	0	0	0	40	0	0	0	0	0	0	0	0
0	1	0	0	35.4601	0	0	0	0	0	1	1	0	0	0	0	0	0	1	0	0	1	0	0	0	0	0	1	1	0	2	0	0	0	1	0	1	0	0	0	0	0	37	35.2	0	0	0	0	0
0	1	0	0	69.3958	1	0	0	0	1	1	1	0	0	0	0	1	0	1	0	0	0	0	0	0	1	0	1	1	0	1	1	1	0	1	1	1	0	0	0	93	0	0	0	0	0	0	0	0
0	1	0	0	68.646	0	0	0	0	0	1	0	0	0	0	0	1	0	0	0	0	0	0	0	0	1	0	1	1	0	1	1	1	0	1	1	1	0	0	0	31	0	0	0	0	0	0	0	0
0	1	0	0	81.5766	1	0	0	0	0	0	0	0	0	0	0	1	0	0	0	0	0	0	0	1	1	0	1	1	0	2	0	0	0	1	1	1	0	0	0	30	0	0	0	0	0	0	0	0
0	1	0	0	98.2586	0	1	0	1	0	1	0	0	0	0	0	0	0	0	0	0	0	0	0	0	1	0	1	1	0	2	0	0	0	1	0	1	0	0	0	57	0	0	0	0	0	0	0	0
1	1	0	0	78.5067	0	1	0	0	0	0	1	1	0	0	1	0	1	0	0	0	0	0	1	0	1	0	1	0	0	2	0	0	1	1	1	1	0	0	0	33	1	39.2	36.8	0	0	0	0	0
0	1	0	0	85.172	1	0	0	0	0	0	1	0	0	0	0	1	0	0	0	0	0	0	1	0	1	0	1	1	0	2	1	0	0	0	1	0	0	0	0	30	0	0	0	0	0	0	0	0
0	1	0	0	62.9307	0	0	1	0	0	1	0	0	0	0	0	1	1	0	0	0	0	0	0	0	1	0	1	0	1	2	0	1	0	0	0	1	0	0	0	65	0	0	0	0	0	0	0	0
1	1	0	0	79.5659	0	0	1	0	0	1	0	0	0	0	0	0	0	0	0	0	0	0	0	0	1	0	1	0	0	1	1	1	1	0	1	1	0	0	0	20	0	37.1	35.6	0	0	0	0	0
1	1	0	0	69.5903	0	1	0	1	0	1	0	0	0	0	1	1	0	0	0	0	0	0	0	0	1	0	1	1	0	1	1	1	0	1	0	1	0	0	0	75	0	37.6	36.5	0	0	0	0	0
1	1	0	0	55.3355	1	0	0	0	0	1	0	0	1	0	0	0	0	0	0	1	0	0	0	0	0	0	1	1	0	2	0	0	0	0	0	0	0	0	0	10	1	38.6	35.5	0	0	0	0	0
1	1	0	0	76.9169	1	0	0	0	0	0	1	0	0	0	1	1	1	1	0	0	1	0	1	0	1	0	1	1	0	2	0	0	0	0	0	0	0	0	0	21	1	38.5	36.7	0	0	0	0	0
0	1	0	0	48.624	1	0	0	0	0	1	0	0	0	0	0	1	0	1	0	0	0	0	0	0	1	0	1	1	0	2	1	1	0	0	0	0	0	0	0	67	0	0	0	0	0	0	0	0
0	1	0	0	79.3016	0	0	0	0	1	1	0	0	0	0	0	0	0	0	0	0	0	0	0	0	1	0	1	1	0	1	1	1	0	0	1	1	0	0	0	34	0	0	0	0	0	0	0	0
0	1	0	0	50.6778	1	0	0	0	0	1	1	0	0	0	1	1	0	0	0	0	0	0	1	0	1	0	1	1	1	2	0	0	0	0	0	0	0	0	0	45	0	0	0	0	0	0	0	0
0	1	0	0	66.6031	1	0	1	0	0	0	0	0	1	0	0	0	0	0	0	0	0	0	0	0	0	0	0	1	0	1	1	1	0	0	0	0	0	0	0	105	0	0	0	0	0	0	0	0
1	1	0	1	58.842	0	0	0	0	1	0	0	0	0	0	0	0	0	0	0	1	1	0	0	0	1	1	1	1	0	1	1	1	0	0	0	1	0	0	0	33	0	37	33	0	0	0	0	0
1	1	0	1	81.7254	0	1	1	1	0	0	0	0	0	0	0	0	0	0	0	1	0	0	0	0	1	1	1	1	0	1	1	1	0	0	0	1	0	0	0	46	0	36.4	33.8	0	0	0	0	0
1	1	0	1	82.3727	1	0	0	0	0	1	1	0	0	1	1	1	1	0	0	1	1	0	0	0	1	1	1	0	0	4	1	1	1	0	0	1	0	0	0	49	0	37	36.5	0	0	0	0	0
0	1	0	0	94.0389	0	1	0	0	1	1	1	1	0	0	0	1	0	0	0	0	0	0	0	0	1	0	1	1	0	2	1	1	0	0	0	1	1	0	0	53	0	0	0	0	0	0	0	0
1	1	0	0	67.2034	1	0	0	0	0	0	0	0	0	0	0	0	1	1	0	1	0	0	1	0	1	0	1	1	0	2	0	0	0	0	0	0	0	0	0	14	1	38.8	36.3	0	0	0	1	0
0	1	0	0	65.0385	1	0	0	0	1	1	1	0	0	0	1	0	0	0	0	0	0	0	1	0	1	0	1	1	1	1	1	1	0	0	0	1	0	0	0	35	0	0	0	0	0	0	0	0
0	1	0	0	57.894	1	0	0	0	0	1	0	0	0	0	0	1	0	0	0	0	0	0	0	0	1	0	1	1	0	1	1	1	0	0	0	1	0	0	0	60	0	0	0	0	0	0	0	0
0	1	0	0	85.5289	1	0	0	0	0	1	0	0	1	0	0	0	0	0	0	0	0	0	0	0	1	0	1	0	1	2	0	0	0	0	0	0	0	0	0	74	0	0	0	0	0	0	0	0
1	0	0	0	77.0811	1	1	0	0	0	1	0	0	0	0	0	0	0	0	0	0	0	0	0	0	1	0	1	1	0	1	1	1	0	0	0	1	0	0	0	6	0	37.2	36	0	0	0	1	1
1	1	0	0	80.4267	0	0	0	1	0	1	1	0	0	0	1	1	0	0	0	0	0	0	0	0	1	0	1	1	0	2	0	0	0	0	0	0	0	0	0	10	0	37.4	35	0	0	0	1	0
1	1	0	0	72.4197	0	0	0	0	0	1	1	0	0	0	1	1	0	0	0	1	1	0	1	0	1	0	1	1	0	2	0	0	0	0	0	0	0	0	0	15	1	38	36.8	0	0	0	1	0
0	1	0	0	77.9971	0	1	0	1	0	0	0	0	0	0	0	1	0	0	0	0	0	0	0	0	1	0	1	0	0	2	1	0	1	0	0	1	0	0	0	15	0	0	0	0	0	0	0	0
0	1	0	0	49.3986	1	0	0	0	0	0	0	0	0	0	0	0	0	0	0	0	0	0	0	0	0	0	0	1	0	2	0	0	0	0	0	0	0	0	0	84	0	0	0	0	0	0	0	0
0	1	0	0	67.1607	1	1	0	0	0	0	1	0	0	0	0	0	0	0	0	0	0	0	0	0	0	0	0	0	1	2	0	0	0	0	0	0	0	0	0	33	0	0	0	0	0	0	0	0
1	0	0	0	53.206	0	0	0	0	0	1	1	1	0	1	1	0	0	0	0	0	1	0	0	0	0	0	1	0	0	4	1	1	0	0	0	0	0	0	0	9	0	36.8	36	0	0	0	1	1
1	1	0	0	75.5262	0	0	0	0	0	0	0	0	0	0	0	0	0	1	0	1	0	0	0	1	0	0	1	1	0	2	1	1	0	0	0	0	0	0	0	70	0	37	35	0	0	0	0	0
0	1	0	0	82.9246	0	0	0	1	0	0	0	0	0	0	0	0	0	0	0	0	0	0	0	1	1	0	1	1	0	2	0	0	0	0	0	0	0	0	0	60	0	0	0	0	0	0	0	0
1	1	0	0	81.6067	1	0	0	0	0	1	1	1	0	0	1	1	0	0	0	1	0	0	0	0	1	0	1	1	1	2	0	0	0	0	0	0	0	0	0	12	0	36	35	0	0	0	0	0
0	1	0	0	84.9128	1	0	0	0	1	1	1	0	0	0	0	1	0	0	0	0	0	0	1	0	1	0	1	0	0	1	1	1	0	0	0	1	0	0	0	99	0	0	0	0	0	0	0	0
1	1	0	0	66.2199	1	0	1	0	1	1	0	1	0	0	0	0	0	0	0	0	1	0	1	0	1	1	1	1	0	1	1	1	1	0	1	1	0	0	0	25	1	38	35.6	0	0	0	0	0
0	1	0	0	60.617	1	0	0	0	0	0	0	0	0	0	1	0	0	1	0	0	0	0	0	0	0	0	0	0	1	2	0	0	0	0	0	0	0	0	0	80	0	0	0	0	0	0	0	0
1	1	0	0	65.3738	1	0	0	1	0	0	0	0	0	0	0	1	0	0	0	0	0	0	1	0	1	0	1	1	0	2	1	0	1	0	0	1	0	0	0	30	1	38.1	36	0	0	0	0	0
1	1	0	0	79.6123	1	0	0	0	0	1	1	0	0	0	0	1	0	0	0	1	0	0	1	0	1	0	1	0	1	1	1	1	0	0	0	1	0	0	0	7	1	38.3	36.4	0	0	0	0	0
1	0	0	0	72.9568	1	0	1	0	0	0	0	0	0	0	0	1	0	0	0	1	0	0	1	0	0	0	1	0	1	1	1	1	0	0	0	1	0	0	0	7	1	38.4	36	0	0	0	1	1
0	1	0	0	55.0071	1	1	1	0	0	0	0	0	0	0	1	0	0	0	0	0	0	0	0	0	0	0	0	0	1	1	1	1	0	0	0	0	0	0	0	44	0	0	0	0	0	0	0	0
0	1	0	0	83.5773	0	1	1	1	0	0	1	0	0	0	0	0	0	0	0	0	0	0	0	0	1	0	1	0	0	1	1	1	0	0	0	1	0	0	0	10	0	0	0	0	0	0	0	0
1	1	0	0	35.3677	0	0	0	0	0	0	0	0	0	0	0	0	0	0	1	0	0	0	0	0	1	1	1	1	0	4	1	1	0	0	0	1	0	0	0	42	0	36.7	36.7	0	0	0	0	0
1	1	0	0	72.3259	1	0	0	0	0	1	0	0	0	0	0	1	0	0	0	0	0	0	0	0	1	0	1	1	1	2	0	0	0	0	0	0	0	0	0	19	0	37.8	35.3	0	0	0	1	0
0	1	0	0	35.9767	1	0	0	0	1	1	1	1	1	0	0	1	0	0	0	0	0	0	1	0	1	0	1	0	1	1	1	1	0	0	1	1	0	0	0	85	0	0	0	0	0	0	0	0
1	1	0	0	49.967	1	0	1	0	0	0	1	0	0	0	0	0	0	0	0	0	1	1	0	1	1	1	1	0	0	1	1	1	0	0	0	1	0	0	0	4	0	37.1	35.6	0	0	0	0	0
0	1	0	0	70.997	0	0	0	0	0	1	0	0	0	0	0	1	0	1	0	0	0	0	0	0	0	0	0	0	0	2	0	0	0	0	0	0	0	0	0	37	0	0	0	0	0	0	0	0
0	1	0	0	56.9877	0	0	0	1	1	1	0	1	0	1	0	1	0	0	0	0	0	0	0	0	1	0	1	1	0	1	1	1	0	0	1	1	0	0	0	7	0	0	0	0	0	0	0	0
0	1	0	0	62.3523	0	0	0	0	0	0	0	0	0	0	1	0	0	0	0	0	0	0	0	0	0	0	0	1	0	2	0	0	0	0	0	0	0	0	0	47	0	0	0	0	0	0	0	0
0	1	0	0	59.7678	0	0	0	0	1	1	0	0	0	0	0	0	0	0	0	0	0	0	0	0	1	0	1	1	0	1	1	1	0	0	0	1	0	0	0	28	0	0	0	0	0	0	0	0
1	1	0	0	71.4985	0	1	0	1	0	0	0	0	0	0	0	1	0	0	0	0	0	0	0	0	0	0	0	1	0	1	1	1	1	0	0	1	0	0	0	13	1	38.2	36.3	0	0	0	0	0
1	1	0	0	68.8458	0	0	0	0	0	0	1	1	0	1	0	0	0	0	0	0	0	0	0	0	1	0	1	1	0	2	0	0	1	0	0	0	0	0	0	29	0	35	35	0	0	0	0	0
1	1	0	1	71.9545	0	0	0	0	0	1	1	0	0	0	1	1	0	0	0	0	1	0	0	0	1	1	1	0	0	1	1	1	0	0	0	1	0	0	0	66	0	37.3	35.1	1	0	0	0	0
1	0	0	1	61.4375	1	1	0	0	0	1	1	0	0	0	1	0	0	0	0	1	1	0	0	0	1	0	1	1	0	1	1	1	0	0	0	1	0	0	0	14	0	37.1	34.8	0	0	0	1	1
1	1	0	0	71.9027	0	0	0	0	0	1	0	0	0	0	0	1	0	0	0	0	0	0	0	0	1	0	1	0	0	1	1	1	0	1	0	1	0	0	0	4	0	37.8	36.7	0	0	0	1	0
1	1	0	0	84.8439	0	1	0	0	0	0	0	0	0	0	1	1	0	0	0	0	0	0	1	0	1	0	1	1	0	2	0	0	0	0	0	0	0	0	0	9	1	39	35	0	0	0	0	0
1	1	0	1	63.7712	1	0	1	0	0	1	0	0	0	0	0	1	1	0	0	1	0	0	0	0	1	1	1	0	0	1	1	1	1	0	0	1	0	0	0	0	1	38.1	35.7	1	0	0	1	1
1	1	0	0	63.6801	0	0	0	0	0	1	0	0	0	0	0	0	0	1	0	0	1	0	1	1	1	0	1	1	0	2	1	1	0	0	0	0	0	0	0	42	0	36.4	35	0	0	0	0	0
1	1	0	1	44.8573	1	1	0	0	0	0	1	1	0	0	0	0	0	0	0	1	1	0	0	0	0	1	1	1	0	1	1	1	0	0	0	1	0	0	0	95	0	33.4	33.1	1	0	0	0	0
0	1	0	0	77.0745	1	0	0	0	0	1	0	0	0	1	1	1	0	0	0	0	0	0	0	0	1	0	1	0	0	1	1	1	0	0	0	1	0	0	0	36	0	0	0	0	0	0	0	0
0	1	0	1	60.5609	1	0	1	0	0	1	0	0	1	0	1	0	0	0	0	0	0	0	0	0	0	0	0	1	1	1	1	1	1	0	0	0	0	0	0	440	0	0	0	0	0	0	0	0
0	1	0	0	74.1487	1	1	1	1	0	1	1	1	0	0	1	0	0	0	0	0	0	0	0	0	1	0	1	1	0	1	1	1	0	0	0	1	0	0	0	22	0	0	0	0	0	0	0	0
0	1	0	0	64.7761	0	0	0	0	0	1	0	0	1	0	0	0	0	1	0	0	0	0	0	0	1	0	1	0	0	2	1	1	0	0	0	0	0	0	0	73	0	0	0	0	0	0	0	0
1	1	0	0	82.5988	0	0	0	1	0	1	1	1	0	1	0	0	0	0	0	1	0	0	0	0	1	0	1	1	0	2	0	0	0	0	0	0	0	0	0	7	1	38	36.8	0	0	0	0	0
0	1	0	0	76.2294	1	1	1	1	0	1	1	0	1	1	0	1	0	0	0	0	0	0	0	0	1	0	1	1	1	2	0	0	0	0	0	0	0	0	0	37	0	0	0	0	0	0	0	0
0	1	0	0	81.9185	1	0	0	0	0	1	0	0	0	0	0	0	0	0	0	0	0	0	0	0	1	0	1	1	1	1	1	1	0	0	0	0	0	0	0	15	0	0	0	0	0	0	0	0
1	1	0	0	67.3861	1	0	0	0	0	1	1	1	0	0	1	1	0	0	0	0	0	0	0	0	1	0	1	1	1	2	0	0	0	0	0	0	0	0	0	10	0	37.8	36.8	0	0	0	1	1
1	1	0	1	63.0378	1	0	0	0	0	0	0	0	0	0	1	0	0	0	0	1	0	0	0	0	0	1	1	0	0	4	1	1	0	0	0	0	0	0	0	60	0	37.5	35.8	1	0	0	0	0
0	1	0	0	78.2989	0	0	0	1	0	1	1	1	0	0	1	1	0	0	0	0	0	0	0	0	1	0	1	0	0	1	1	1	0	0	0	1	0	0	0	15	0	0	0	0	0	0	0	0
0	1	0	0	54.6624	1	0	0	0	0	0	1	0	1	0	0	0	0	0	0	0	0	0	0	0	0	0	0	0	0	2	1	0	0	0	0	0	0	0	0	105	0	0	0	0	0	0	0	0
0	1	0	1	49.9432	0	0	0	0	1	1	1	1	0	1	0	0	0	0	0	0	0	0	0	0	1	0	1	1	0	2	0	0	1	0	0	0	0	0	0	84	0	35.6	35.4	0	0	0	0	0
0	1	0	0	93.3784	0	0	0	0	0	1	0	0	0	1	0	1	0	0	0	0	0	0	0	0	1	0	1	0	1	2	0	0	0	0	0	0	0	0	0	36	0	0	0	0	0	0	0	0
1	1	0	1	79.4036	1	0	1	0	0	0	1	1	0	0	1	0	0	0	0	1	0	0	1	0	1	1	1	1	0	1	1	1	0	0	0	1	0	0	0	30	0	32.3	31.6	0	0	0	0	0
1	1	0	1	60.3199	1	1	1	0	0	1	1	0	0	0	0	1	0	0	0	1	1	0	1	0	1	1	1	1	0	1	1	1	0	0	0	1	0	0	0	26	1	39	32	0	0	0	0	0
0	1	0	1	48.9348	1	0	0	0	0	1	1	1	1	0	1	0	0	0	0	0	0	0	0	0	1	1	1	0	0	1	1	1	0	0	0	1	0	0	0	15	0	36.9	33.3	0	0	0	0	0
1	1	0	1	36.1969	0	0	1	0	0	1	0	0	0	0	0	0	0	0	0	0	0	0	0	0	1	1	1	1	0	1	1	1	1	0	0	1	0	0	0	36	0	36.7	35.8	0	0	0	0	0
0	1	0	0	71.8507	0	0	1	0	0	1	0	0	0	0	1	0	0	0	0	0	0	0	1	0	1	0	1	0	1	1	1	1	0	1	0	1	0	0	0	31	0	0	0	0	0	0	0	0
0	1	0	0	86.502	1	0	0	0	0	1	0	0	0	0	0	1	0	0	0	1	1	0	0	0	1	0	1	1	0	2	0	0	0	0	0	1	0	0	0	0	0	36.3	36.3	0	0	0	0	0
0	1	0	0	56.9434	1	0	0	0	1	1	0	0	1	0	0	0	0	0	0	0	0	0	1	0	1	0	1	0	0	1	1	1	0	0	0	1	0	0	0	41	0	0	0	0	0	0	0	0
1	1	0	0	82.0006	1	0	0	1	0	1	1	1	0	0	1	1	0	0	0	0	0	0	0	0	1	0	1	0	0	1	1	1	1	0	0	1	0	0	0	5	1	38.6	36.8	0	0	0	1	0
1	1	0	1	56.0825	1	1	0	0	0	1	0	0	0	0	1	0	0	0	0	0	0	0	0	0	0	0	0	1	1	1	1	1	0	0	0	1	0	0	0	53	1	38	35.6	0	0	0	0	0
1	1	0	1	72.9607	0	0	0	0	0	1	0	0	0	0	0	0	0	0	0	0	0	0	0	0	1	0	1	1	1	1	1	1	0	0	0	1	0	0	0	18	0	35.6	33.1	0	0	0	0	0
1	1	0	1	51.5061	1	1	0	0	0	0	0	0	0	0	0	0	0	0	0	0	0	0	0	0	0	1	1	0	0	4	1	1	0	0	0	1	0	0	0	10	0	37.3	36.2	0	0	0	1	1
1	1	0	0	84.6009	1	0	1	0	0	1	1	1	0	0	0	0	0	0	0	1	1	0	0	0	1	1	1	0	0	1	1	1	0	0	0	1	0	0	0	16	0	36.8	34	0	0	0	0	0
1	1	0	0	87.5226	0	0	0	1	0	1	1	0	0	1	1	1	0	0	0	0	0	0	1	0	1	0	1	0	1	2	1	1	0	0	0	0	0	0	0	6	0	37.4	36.2	0	0	0	0	0
1	1	0	0	51.8778	0	0	0	0	0	1	0	0	0	0	0	0	0	0	0	0	0	0	1	0	0	0	1	0	0	2	0	0	0	0	0	0	0	0	0	185	0	35	35	0	0	0	0	0
1	1	1	0	86.4393	0	0	0	0	0	1	0	NA	0	0	0	0	0	0	0	0	0	0	0	1	1	0	1	1	1	1	1	1	0	1	0	0	0	0	0	4	0	37.4	36.2	0	0	0	1	0
1	1	0	1	50.2583	1	0	0	0	0	1	0	0	0	0	0	0	0	0	0	0	0	0	0	0	1	0	1	1	0	1	1	1	0	0	0	0	0	0	0	50	1	39.1	36.1	0	0	0	0	0
1	1	0	1	76.8372	1	0	1	0	0	0	0	0	0	0	0	0	0	0	0	1	1	0	0	0	0	0	1	1	0	2	1	0	0	0	0	1	0	0	0	48	0	36.8	34.8	0	0	0	0	0
0	1	1	1	30.0931	0	0	0	0	0	1	1	1	0	0	0	0	0	0	0	0	1	0	0	0	1	0	1	0	1	1	1	1	0	0	1	1	0	0	0	45	0	32.5	31	0	0	0	0	0
0	1	0	0	53.9371	1	0	0	0	0	1	0	0	0	0	0	0	0	0	0	0	0	0	1	0	1	0	1	0	1	1	1	1	1	0	0	1	0	0	0	55	0	0	0	0	0	0	0	0
1	1	0	1	75.8058	1	0	1	0	0	1	0	0	0	0	0	0	0	0	0	1	0	0	0	0	1	0	1	1	0	1	1	1	0	0	0	1	0	0	0	87	0	37.2	35.5	1	0	0	0	0
1	1	0	1	60.6596	1	1	0	0	1	1	1	0	0	0	1	0	0	0	0	1	1	0	0	0	1	1	1	1	0	1	1	1	0	0	0	1	0	1	0	14	0	37	36.4	0	0	0	0	0
0	1	0	0	80.898	0	0	0	0	0	0	0	0	0	0	0	0	0	0	0	0	0	0	0	0	1	0	1	1	0	2	0	0	0	0	0	0	0	0	0	75	0	0	0	0	0	0	0	0
1	1	0	1	75.4938	1	1	0	0	0	1	1	1	0	0	1	0	0	0	0	1	1	0	0	0	1	1	1	1	0	1	1	1	0	0	1	1	0	0	0	31	0	36.3	35.6	1	0	0	0	0
1	1	0	1	28.5193	0	1	0	0	0	1	1	0	0	0	0	1	0	0	0	0	0	0	0	0	0	1	1	0	1	1	1	1	0	0	0	1	0	0	0	33	1	38.1	36.8	0	0	0	0	0
0	1	0	1	84.798	0	0	0	0	0	1	1	0	0	0	0	0	0	0	0	0	0	0	0	0	1	0	1	0	0	1	1	1	0	1	0	1	1	0	0	37	0	34.2	0	0	0	0	0	0
1	1	0	0	42.1948	1	1	0	0	0	0	1	0	0	0	0	0	0	0	0	0	0	0	0	0	0	0	0	0	0	2	0	0	0	0	0	0	0	0	0	30	0	37.1	35.6	0	0	0	0	0
0	1	0	1	75.6109	0	0	1	0	0	1	0	0	0	0	0	0	0	0	0	0	0	0	0	0	0	0	0	1	0	1	1	1	0	0	0	0	0	0	0	53	0	34.8	0	0	0	0	0	0
1	1	0	1	58.3121	0	0	0	0	0	1	0	0	0	1	1	1	1	0	0	0	0	0	0	0	1	1	1	0	0	1	1	1	0	1	0	0	0	0	0	17	0	37.6	35.8	0	0	0	0	0
0	1	0	0	32.5382	1	1	0	0	0	0	0	0	0	0	0	0	0	0	0	0	0	0	0	0	0	0	0	0	0	2	0	0	0	0	0	0	0	0	0	84	0	0	0	0	0	0	0	0
0	1	0	0	19.0629	1	0	0	0	1	1	0	0	0	0	0	1	1	0	0	0	0	0	0	0	1	0	1	1	0	1	1	1	0	1	0	0	0	0	0	213	0	0	0	0	0	0	0	0
1	0	0	1	77.466	1	0	0	0	0	1	1	0	0	1	1	0	0	0	0	0	0	0	0	0	0	0	0	0	0	2	0	0	0	0	0	0	0	0	0	26	0	37.8	35.1	0	0	0	1	0
1	1	0	1	51.8911	1	0	1	0	0	1	0	0	0	0	1	0	0	0	0	1	0	0	0	0	0	0	1	1	0	4	1	1	0	0	0	0	0	0	0	40	0	37.9	35.8	0	0	0	1	1
1	1	0	1	50.1219	1	0	0	0	0	0	0	0	0	0	0	0	0	0	0	0	0	0	0	1	0	0	1	1	0	1	1	1	0	1	0	1	0	0	0	23	1	38.8	36	0	0	0	1	0
0	1	0	0	57.6384	0	0	0	0	0	1	0	0	0	0	0	0	0	0	0	0	0	0	0	0	1	0	1	0	0	1	1	1	1	1	0	1	1	0	0	4	0	0	0	0	0	0	0	0
0	1	0	0	31.8621	1	0	0	0	0	1	1	0	0	0	0	0	0	1	0	0	0	0	1	0	1	0	1	0	0	1	1	1	0	1	0	1	0	0	0	6	0	0	0	0	0	0	0	0
1	1	0	1	50.0123	1	1	0	0	0	0	0	0	0	0	0	0	0	0	0	0	0	0	0	0	0	0	0	1	0	2	0	0	0	0	0	0	0	0	0	49	0	36.2	0	0	0	0	0	0
1	1	0	1	61.4927	0	0	0	0	0	0	0	0	0	0	1	0	0	0	0	0	1	0	0	0	0	1	1	1	0	2	0	0	0	0	0	0	0	0	0	60	0	35.6	32.3	0	0	0	0	0
1	1	0	1	49.1806	0	1	0	0	0	1	1	0	0	0	1	0	0	0	0	0	0	0	0	0	1	0	1	1	1	1	1	1	0	1	0	1	1	1	0	16	0	37.1	35.5	0	0	0	1	1
1	1	0	1	68.1539	1	1	0	0	0	1	1	0	0	0	1	0	1	0	0	0	0	0	0	0	1	0	1	1	0	1	1	1	0	0	1	1	1	0	0	43	0	33.3	0	0	0	0	0	0
0	1	0	0	83.85	1	1	0	1	0	1	0	0	0	0	0	0	0	0	0	0	0	0	0	0	1	0	1	1	1	1	1	1	1	1	1	1	0	0	0	129	0	0	0	0	0	0	0	0
1	1	0	1	31.0185	1	1	0	0	0	1	0	0	0	0	0	1	0	0	0	1	0	0	0	0	0	0	1	0	0	1	1	1	0	0	0	0	0	0	0	20	1	38	36.1	0	0	0	0	0
0	1	0	1	44.5868	0	1	0	0	0	1	0	0	0	0	0	1	0	1	0	0	0	0	0	0	1	0	1	1	1	1	1	1	0	1	0	1	1	0	0	36	0	35.3	0	0	0	0	0	0
1	1	0	1	68.6821	1	0	0	0	0	1	1	0	1	0	1	0	0	0	0	0	1	0	0	0	0	0	1	1	1	2	0	0	0	0	1	0	0	0	0	40	0	37	33.7	0	0	0	0	0
1	1	0	1	57.2897	0	1	0	0	0	1	1	0	0	0	1	0	0	0	0	0	0	0	0	0	0	0	0	1	0	2	0	1	0	0	0	0	1	0	0	23	0	37	35.3	1	0	0	0	0
1	1	0	1	23.2777	1	0	0	0	0	1	0	0	0	0	0	0	0	1	0	0	0	0	0	0	1	0	1	1	1	2	0	0	0	1	0	0	0	0	0	72	0	37.3	0	0	0	0	0	0
0	1	0	1	66.388	1	1	0	0	0	0	1	1	0	1	1	0	0	0	0	1	1	0	0	0	0	0	1	1	1	1	1	1	0	0	1	1	0	0	0	105	0	34.4	0	0	0	0	0	0
0	1	0	1	39.0592	1	0	0	0	0	1	0	0	0	0	0	0	0	0	0	0	0	0	0	0	1	0	1	0	0	1	1	1	0	1	1	1	0	0	0	53	0	0	0	0	0	0	0	0
1	0	0	1	58.3558	0	1	0	0	0	1	1	0	0	0	0	0	0	0	0	0	0	0	0	0	0	0	0	0	0	1	1	1	0	1	0	1	0	0	0	7	0	37.2	36.3	0	0	0	0	0
1	1	0	1	37.2284	0	0	0	0	0	1	1	0	0	0	0	1	1	1	0	1	0	0	0	0	0	1	1	0	1	1	1	1	0	1	0	1	0	0	0	12	0	36.6	35.8	0	0	0	0	0
0	1	0	1	40.9746	1	0	0	0	0	0	0	0	0	0	0	0	0	0	0	0	0	0	0	0	1	0	1	1	1	1	1	1	0	0	0	1	0	0	0	85	0	0	0	0	0	0	0	0
1	1	0	1	66.0293	1	0	0	0	0	1	0	0	0	0	0	0	0	0	0	0	1	0	0	0	1	0	1	1	0	2	0	1	1	0	0	1	0	0	1	22	0	36.2	0	1	0	0	1	1
1	1	0	1	74.1254	1	0	0	1	0	1	0	0	0	0	0	0	0	0	0	1	0	0	1	0	1	1	1	1	0	1	1	1	1	1	1	1	0	0	0	107	0	36.4	31.7	0	1	0	0	0
1	1	0	1	66.1477	1	0	1	0	0	0	0	0	0	0	0	0	0	0	0	1	0	0	0	0	0	0	1	0	1	1	1	1	1	1	0	1	0	0	0	10	0	37	35.2	1	0	0	1	1
1	1	0	1	60.6002	1	1	0	0	0	1	0	0	0	0	0	1	0	0	0	0	0	0	0	0	0	0	0	1	0	1	1	1	1	1	0	1	0	0	1	5	1	38.5	37.9	1	0	0	1	1
1	1	0	0	45.5198	1	0	0	0	1	1	1	0	1	0	0	0	0	0	0	1	1	0	0	0	0	0	1	1	0	2	1	0	0	0	0	0	0	0	0	10	0	37.2	35.6	0	0	0	0	0
1	1	0	0	61.737	1	1	0	1	0	1	1	0	1	0	1	0	0	0	0	1	0	0	0	0	0	0	1	0	0	2	0	0	0	0	1	0	0	0	0	21	0	36.3	35.6	0	0	0	0	0
0	1	0	0	83.4088	1	0	0	0	0	1	0	0	1	0	0	0	0	1	0	0	0	0	0	0	0	0	0	1	0	2	0	1	0	0	0	0	0	0	0	85	0	0	0	0	0	0	0	0
1	1	0	0	78.8369	1	0	0	0	1	1	0	0	1	1	0	0	0	0	0	0	0	0	0	0	1	0	1	1	1	1	1	1	1	1	0	1	0	0	0	6	0	37.5	33.4	0	0	0	1	1
1	1	0	0	73.6069	1	1	1	0	1	1	1	0	1	1	1	0	1	0	0	1	0	0	0	1	1	1	1	1	0	1	1	1	0	1	0	1	1	0	0	14	0	35.8	34.6	0	0	0	0	0
0	1	0	0	96.564	1	0	0	0	0	1	0	0	0	0	1	1	1	0	0	0	0	0	0	0	0	0	0	1	1	2	0	0	0	0	0	0	0	0	0	28	0	0	0	0	0	0	0	0
1	1	0	0	60.4763	1	0	0	1	0	1	0	1	0	0	0	1	0	0	0	0	0	0	0	0	1	1	1	1	0	1	1	1	1	1	0	0	0	0	0	6	0	37.3	35.4	0	0	0	1	0
1	1	0	0	63.087	1	0	0	0	1	1	1	1	1	0	1	0	1	0	0	0	0	0	0	0	0	0	0	0	1	2	0	1	0	0	0	1	0	0	0	27	0	37.3	35.5	1	0	0	1	1
0	1	0	0	58.5587	0	0	0	0	1	1	0	0	1	0	0	1	0	1	0	0	0	0	0	0	1	0	1	0	0	1	1	1	0	1	0	1	0	0	0	4	0	0	0	0	0	0	0	0
0	1	0	0	30.4261	0	1	0	0	1	1	1	0	0	0	0	1	0	0	0	0	0	0	0	0	1	0	1	1	0	1	1	1	0	1	0	1	1	0	0	100	0	0	0	0	0	0	0	0
1	0	0	0	74.1009	1	1	0	0	1	1	0	0	0	0	0	0	1	0	0	0	0	0	0	0	0	0	0	0	0	2	0	1	0	0	0	1	0	0	0	9	0	35.6	35.1	0	0	0	1	0
1	1	0	0	87.114	1	0	0	0	0	1	0	0	0	0	0	0	0	0	0	0	0	0	1	0	0	0	1	0	0	2	0	0	0	0	0	0	0	0	0	40	1	39.5	35.2	0	0	0	1	0
1	1	0	0	76.6537	1	0	0	0	0	1	1	0	0	0	0	0	1	0	0	0	0	0	0	0	0	0	0	1	0	2	0	0	0	0	0	0	0	0	0	20	1	41.4	36.4	0	0	0	0	0
1	1	0	0	20.662	1	0	1	0	0	1	1	0	0	0	0	1	1	0	0	0	0	0	0	1	0	1	1	1	0	2	1	1	1	1	0	0	0	0	0	20	1	40	38	0	0	0	1	0
1	1	0	0	78.538	1	0	1	1	1	1	1	0	0	0	1	0	0	0	0	0	0	0	0	0	0	0	0	1	0	1	1	1	1	1	0	1	1	0	1	32	0	36.8	36.2	1	0	0	0	0
1	0	0	0	89.0497	1	1	0	1	1	1	1	0	1	0	0	0	1	0	0	1	0	0	0	0	0	0	1	0	0	1	1	1	0	0	0	1	0	0	0	2	0	36.5	0	0	0	0	0	0
1	0	0	0	73.8656	0	0	0	0	0	0	1	0	0	0	1	0	0	0	0	0	0	0	0	0	0	0	0	0	0	2	0	0	0	0	0	0	0	0	0	4	0	37	0	0	0	0	0	0
1	0	0	0	49.1932	1	0	0	0	1	0	1	0	0	0	1	0	0	0	0	0	0	0	0	0	0	0	0	1	0	2	0	0	0	0	0	0	0	0	0	4	0	36.5	35.4	0	0	0	1	1
1	1	0	0	56.1545	1	0	0	0	0	0	0	0	0	0	1	0	0	1	0	0	0	0	0	0	0	0	0	0	1	2	1	0	0	1	0	0	0	0	0	19	0	37	35.8	0	0	0	1	0
1	0	0	0	59.7407	1	0	1	1	0	1	0	0	0	0	1	1	0	0	0	1	0	0	0	0	1	0	1	1	0	1	1	1	1	1	0	1	0	0	0	36	1	42	0	1	0	0	1	1
1	1	0	0	74.6256	1	0	0	1	1	1	1	1	0	0	0	0	0	0	0	0	0	0	0	0	1	0	1	1	0	1	1	1	0	1	0	1	1	0	0	14	0	36.2	35.6	0	0	0	0	0
1	1	0	0	88.7319	1	1	0	0	1	1	0	0	0	0	0	0	0	0	0	0	0	0	0	0	0	0	0	1	0	2	0	1	1	0	1	1	0	0	0	5	0	36.8	35.4	0	0	0	1	1
0	1	0	0	30.5795	0	0	0	0	1	1	1	0	1	1	0	0	0	1	0	0	0	0	0	0	0	0	0	1	0	1	1	1	0	0	1	0	0	0	0	11	0	0	0	0	0	0	0	0
1	1	0	0	51.6736	1	1	0	0	0	1	1	0	0	0	0	0	0	0	0	1	0	0	0	0	0	0	1	1	1	1	1	1	0	0	0	0	0	1	0	5	1	38.5	36.8	0	0	0	1	1
1	1	0	0	68.306	1	0	0	1	1	0	0	0	1	0	0	0	0	1	0	0	0	0	0	0	0	1	1	1	0	1	1	1	0	0	0	1	0	0	0	14	0	35.8	33.5	0	0	0	0	0
1	1	0	0	45.9856	1	0	0	0	0	1	0	0	0	1	0	0	0	0	0	0	0	0	1	0	0	0	1	1	1	2	0	1	0	0	0	0	0	0	0	30	0	35	34.2	0	0	0	0	0
1	1	0	0	59.6148	0	0	0	0	0	1	0	0	0	0	0	0	0	0	0	0	0	0	1	0	1	0	1	1	0	2	1	0	0	1	0	0	0	0	0	4	0	37.3	35.2	0	0	0	1	0
1	1	0	0	38.0411	1	0	0	0	0	1	1	1	0	0	1	1	0	0	0	0	1	0	0	0	0	0	1	0	1	2	0	0	0	0	0	0	0	0	0	9	0	36.8	34.8	0	0	0	1	0
1	1	0	0	84.6046	0	0	1	0	1	1	1	0	0	0	1	0	0	0	0	0	0	0	0	0	0	0	0	1	0	1	1	1	1	0	0	1	0	1	0	7	1	38.2	34.6	0	0	0	1	1
1	1	0	0	28.4895	1	0	0	0	0	1	0	0	0	0	0	1	0	0	0	0	0	0	0	0	0	0	0	1	0	2	1	0	0	0	0	0	0	0	0	26	1	38.6	37	0	0	0	1	0
0	1	0	0	48.6463	1	1	0	0	0	1	0	0	0	0	0	0	0	1	0	0	0	0	0	0	0	0	0	1	0	2	1	0	0	0	0	0	0	0	0	56	0	0	0	0	0	0	0	0
1	1	0	0	81.4604	0	0	0	0	1	1	1	0	0	1	1	1	0	0	0	0	0	0	1	0	1	1	1	0	0	3	1	1	0	0	0	0	0	0	0	21	0	35.4	32.4	0	0	0	0	0
0	1	0	0	49.6862	1	0	0	0	1	1	0	0	0	0	1	1	0	0	0	0	0	0	0	0	1	0	1	1	0	4	1	1	0	0	0	1	0	0	0	444	1	42	0	0	0	0	0	0
1	1	0	0	52.5925	1	0	0	0	0	1	0	0	0	0	0	1	0	1	0	0	0	0	0	0	1	1	1	0	0	2	1	0	0	0	0	0	0	0	0	7	0	37.5	36.4	0	0	0	1	0
0	1	0	0	54.773	0	0	0	0	0	1	0	0	0	0	0	1	0	0	0	0	0	0	0	0	1	0	1	1	0	1	1	1	0	1	0	0	0	0	0	39	0	0	0	0	0	0	0	0
1	0	0	0	58.6902	1	0	0	1	0	1	1	1	0	0	1	0	1	0	0	0	0	0	0	0	1	1	1	0	1	2	0	1	0	0	1	0	0	0	0	21	1	39.8	36.4	0	0	0	0	0
1	0	0	0	68.6289	1	1	0	1	0	0	0	0	0	0	1	0	0	0	0	1	0	0	0	0	1	0	1	0	0	2	0	1	1	0	1	0	0	0	0	3	0	36.1	35.8	0	0	0	1	1
1	1	0	0	57.0315	0	1	0	0	0	1	1	0	0	0	1	1	1	0	0	0	0	0	0	0	1	0	1	1	0	2	0	0	0	0	0	0	0	0	0	8	1	38.9	36	0	0	0	0	0
1	1	0	0	43.1315	1	0	0	0	1	1	0	1	0	1	0	0	0	0	0	0	1	0	0	0	1	1	1	1	0	1	1	1	0	1	0	0	1	0	0	13	0	36.5	36	0	0	0	0	0
1	1	0	0	77.3685	1	0	0	0	1	1	0	1	0	1	1	0	0	0	0	1	1	0	0	0	1	0	1	1	1	1	1	1	0	1	0	1	0	0	0	5	0	36.8	36	0	0	0	0	0
1	1	0	0	63.2897	1	0	0	0	1	1	1	1	1	0	1	0	0	0	0	0	0	0	0	0	0	0	0	0	1	1	1	1	0	0	1	1	0	0	0	13	0	37.1	35.6	0	0	0	0	0
0	1	0	0	81.7229	1	1	0	1	0	0	1	0	0	1	0	1	0	1	0	0	0	0	0	0	1	0	1	1	0	1	1	1	0	1	0	0	0	0	0	45	0	0	0	0	0	0	0	0
0	1	0	0	45.5802	1	0	0	0	0	1	0	0	1	0	1	0	0	0	0	0	0	0	0	0	0	0	0	1	1	2	0	0	0	0	0	0	0	0	0	11	0	0	0	0	0	0	0	0
0	1	0	0	46.7033	1	0	0	0	0	1	0	0	0	0	0	1	0	0	0	0	0	0	0	0	0	0	0	0	0	2	1	0	0	0	0	0	0	0	0	34	0	0	0	0	0	0	0	0
1	1	0	0	74.4191	0	0	0	0	0	1	0	0	0	0	0	0	0	1	0	0	0	0	0	0	0	0	0	0	0	2	0	0	0	0	0	0	0	0	0	13	0	34.7	34.7	0	0	0	0	0
0	1	0	0	87.3849	1	0	0	1	0	1	0	0	0	0	0	0	0	1	0	0	0	0	0	0	1	0	1	1	1	2	0	0	0	0	0	0	0	0	0	60	0	0	0	0	0	0	0	0
0	1	0	0	44.5677	0	0	0	0	0	1	0	0	1	0	0	0	0	1	0	0	0	0	0	0	0	0	0	0	0	2	0	1	0	0	0	0	0	0	0	38	0	0	0	0	0	0	0	0
1	1	0	0	61.5214	1	0	0	0	1	1	0	0	0	0	0	0	0	0	0	0	0	0	1	0	1	0	1	0	0	2	1	0	0	0	0	1	0	0	0	6	0	34.6	34.6	0	0	0	0	0
1	1	0	0	73.6654	1	0	0	0	0	1	1	1	0	0	1	1	0	0	0	0	0	0	1	0	1	0	1	1	1	2	0	0	0	0	0	0	0	0	0	16	1	38.2	35	0	0	0	1	0
0	1	0	0	86.889	1	0	0	0	0	1	0	0	0	0	1	1	0	0	0	0	0	0	0	0	1	0	1	1	1	2	1	0	0	0	0	0	0	0	0	65	0	0	0	0	0	0	0	0
1	1	0	0	33.7303	0	0	0	0	1	1	1	0	1	0	0	0	0	0	0	1	1	0	0	0	0	0	1	1	0	2	0	0	1	0	0	1	0	0	0	24	0	34.5	34.5	0	0	0	0	0
0	1	0	0	76.6135	0	1	1	0	0	1	1	1	0	1	1	0	0	0	0	0	0	0	0	0	0	0	0	1	0	2	1	1	1	0	0	0	0	0	0	79	0	0	0	0	0	0	0	0
0	1	0	0	43.7698	1	0	0	0	1	1	1	1	0	0	0	0	0	0	0	0	0	0	0	0	1	0	1	1	0	2	0	0	0	0	0	1	0	0	0	43	0	0	0	0	0	0	0	0
1	0	0	0	18.8111	0	0	0	0	0	1	1	0	0	1	0	1	0	0	0	0	0	0	1	0	1	0	1	1	0	1	1	1	1	0	0	1	0	0	0	5	0	37	36	0	0	0	1	0
0	1	0	0	70.7714	1	0	0	0	1	1	1	0	1	1	0	1	0	0	0	0	0	0	0	0	0	0	0	1	0	1	1	1	0	0	0	1	0	0	0	18	0	0	0	0	0	0	0	0
1	1	0	0	64.706	1	0	0	0	1	1	0	0	1	0	1	1	0	0	0	1	1	0	0	0	0	1	1	1	0	1	1	1	0	0	0	1	0	0	0	20	0	17.5	15	0	0	0	0	0
1	1	0	0	84.7356	1	0	1	0	0	1	0	1	0	0	0	0	0	0	0	0	0	0	1	0	1	0	1	0	1	2	1	0	0	0	1	1	0	0	0	44	1	38.6	37	0	0	0	0	0
1	1	0	0	79.1007	0	1	0	1	0	0	0	0	0	0	1	0	0	0	0	0	0	0	0	0	0	0	0	0	1	2	0	0	0	0	0	0	0	0	0	40	1	38.4	36.2	0	0	0	1	0
1	1	0	0	76.9628	0	0	1	1	1	1	1	1	0	0	0	1	0	0	0	0	1	0	0	0	0	0	1	0	1	1	1	1	0	1	0	1	0	0	0	5	0	37.5	35.6	0	0	0	0	0
1	1	0	0	56.2487	0	0	0	0	1	0	0	0	1	1	1	1	0	0	0	1	0	0	1	0	0	0	1	1	1	2	0	0	0	0	0	1	0	0	0	15	0	34.6	34.6	0	0	0	0	0
1	0	0	0	66.4627	0	0	0	0	0	0	0	0	0	0	0	0	0	1	0	0	0	0	1	0	0	0	1	0	1	2	0	0	0	0	0	0	0	0	0	7	0	37.7	36	0	0	0	0	0
1	1	0	0	58.9483	0	0	0	0	0	1	0	0	0	0	1	0	0	0	0	0	0	0	0	0	0	1	1	1	0	2	1	0	0	0	0	0	0	0	0	39	1	38	35.5	0	1	0	0	0
1	1	0	0	72.5506	0	0	0	0	0	1	0	0	0	0	0	1	0	0	0	0	0	0	0	0	0	0	0	1	0	2	1	1	0	0	0	0	0	0	0	18	0	36.8	35	0	0	0	1	0
1	1	0	0	75.2417	0	0	0	0	1	1	1	0	0	1	0	1	0	0	0	0	0	0	1	0	1	0	1	1	0	1	1	1	0	0	0	1	0	0	0	9	0	35.2	35.2	0	0	0	0	0
0	1	0	0	56.8866	1	0	0	0	1	1	0	0	0	0	0	1	0	0	0	0	0	0	1	0	0	0	1	1	0	1	1	1	0	0	0	1	0	0	0	60	0	0	0	0	0	0	0	0
0	1	0	0	43.466	1	0	0	0	1	1	1	0	1	0	0	0	0	0	0	0	0	0	0	0	0	0	0	1	0	1	1	1	0	1	0	1	0	0	0	20	0	0	0	0	0	0	0	0
1	1	0	0	47.7668	1	0	0	0	1	1	0	0	0	1	0	0	0	0	0	0	0	1	0	0	1	0	1	1	0	1	1	1	0	0	0	1	0	0	0	7	1	38.1	35.3	0	0	0	0	0
0	1	0	0	76.6623	0	0	0	0	1	1	1	0	1	1	0	1	0	0	0	0	0	0	0	0	1	0	1	1	1	1	1	1	0	0	1	1	0	0	0	23	0	0	0	0	0	0	0	0
0	1	0	0	72.4275	1	0	0	0	1	1	1	0	0	1	0	0	1	1	0	0	0	0	0	0	0	0	0	1	0	1	1	1	0	0	0	1	1	0	0	37	0	0	0	0	0	0	0	0
1	1	0	0	84.7998	0	0	0	0	1	1	0	0	0	1	1	1	0	0	0	0	0	0	0	0	1	1	1	1	0	1	1	1	0	0	0	1	0	0	0	5	1	39.2	36.4	0	0	0	0	0
0	1	0	0	79.3359	1	0	0	0	1	1	1	1	0	0	1	0	0	0	0	0	0	0	1	0	1	0	1	0	0	1	1	1	0	0	0	1	1	0	0	5	0	0	0	0	0	0	0	0
1	1	0	0	35.7476	1	0	0	0	0	1	0	0	0	0	0	1	0	1	0	0	1	0	0	0	1	0	1	1	1	2	1	0	0	1	0	0	0	0	0	14	1	38	36.4	0	0	0	0	0
1	1	0	0	42.3078	0	0	0	0	0	1	0	1	0	0	0	0	1	1	0	0	1	0	1	0	0	1	1	1	1	2	0	0	0	0	0	0	0	0	0	56	1	38.5	33.9	0	0	0	0	0
1	1	0	0	71.8849	0	0	0	0	1	1	1	1	0	1	0	0	0	1	0	1	1	0	1	0	0	0	1	1	0	1	1	1	0	0	0	1	1	0	0	5	0	35.8	35.6	0	0	0	0	0
0	1	0	0	36.8453	0	0	0	0	0	1	0	1	0	0	0	0	0	0	0	0	0	0	0	0	1	0	1	1	0	2	1	1	0	0	0	0	1	0	0	4	0	0	0	0	0	0	0	0
0	1	0	0	63.147	1	0	0	0	0	0	0	0	0	0	0	1	0	0	0	0	0	0	1	0	0	0	1	0	0	2	1	0	0	0	0	0	0	0	0	48	0	0	0	0	0	0	0	0
0	1	0	0	73.6806	1	0	0	1	0	1	0	0	0	0	0	0	0	1	0	0	0	0	0	0	0	0	0	1	1	1	1	1	0	1	1	1	0	0	0	45	0	0	0	0	0	0	0	0
1	1	0	0	74.1862	1	0	0	1	0	1	0	0	0	1	0	1	0	0	0	0	0	0	0	0	1	0	1	0	1	2	1	1	0	0	0	0	0	0	0	31	0	35.8	35.6	0	0	0	0	0
1	1	0	0	61.6035	1	0	0	0	0	1	1	0	1	1	0	1	0	1	0	1	0	0	1	0	0	1	1	0	1	2	0	1	0	0	0	0	0	0	0	15	0	36	34.7	0	0	0	0	0
1	1	0	0	74.2329	1	0	0	0	0	0	1	1	0	0	1	0	0	0	0	0	0	0	0	0	0	0	0	0	0	2	0	0	0	0	0	0	1	0	0	55	0	37.1	35.6	0	0	0	0	0
0	1	0	0	58.0173	0	0	0	0	1	1	1	0	0	0	0	0	0	0	0	0	0	0	0	0	1	0	1	1	0	1	1	1	0	0	0	1	0	0	0	39	0	0	0	0	0	0	0	0
1	1	0	1	67.0456	0	1	0	0	0	1	1	1	0	0	1	0	0	0	0	0	0	0	0	0	0	0	0	0	0	2	0	1	1	0	1	1	0	0	0	23	0	36.6	35.2	1	0	0	0	0
1	1	0	0	77.446	1	0	0	0	0	1	0	0	0	0	0	1	1	1	0	0	0	0	0	0	1	0	1	1	1	1	1	1	0	0	0	1	0	0	0	3	0	37	35.6	0	0	0	0	0
1	1	0	0	67.3412	1	0	0	1	1	1	1	1	0	0	1	0	0	0	0	0	0	0	0	0	1	0	1	0	0	1	1	1	0	0	1	1	0	0	0	4	1	38.6	35.6	0	0	0	0	0
1	1	0	0	82.6232	0	0	0	0	0	1	0	0	0	0	0	0	0	0	0	1	0	0	0	0	0	0	1	1	1	2	0	0	0	0	0	0	0	0	0	30	0	36.3	35.1	0	0	0	0	0
1	1	0	0	76.7544	0	0	0	0	0	0	1	1	1	0	0	0	0	0	0	0	0	0	0	0	1	0	1	0	1	2	1	0	0	0	0	0	1	0	0	12	0	36.1	31.8	0	1	0	0	0
1	1	0	0	82.5705	0	0	0	1	0	1	0	0	0	0	1	0	0	0	0	0	0	0	0	0	0	0	0	1	1	2	1	0	0	0	0	0	0	0	0	42	0	33.2	33.2	0	0	0	0	0
1	1	0	0	21.2955	0	0	0	0	1	1	1	0	0	0	0	0	0	0	0	1	0	0	0	0	0	0	1	1	0	1	1	1	0	0	1	1	0	0	0	3	1	43	35.6	0	0	0	0	0
0	1	0	0	77.5147	1	1	0	0	1	1	1	0	0	0	1	0	0	0	0	0	0	0	0	0	0	0	0	1	1	2	0	1	0	0	0	0	0	0	0	95	0	0	0	0	0	0	0	0
1	1	0	0	73.9282	1	0	0	0	0	0	0	0	0	0	0	1	0	0	0	0	0	0	0	0	1	0	1	1	0	3	0	0	0	0	0	0	0	0	0	13	0	36.8	35.6	0	0	0	0	0
0	1	0	0	78.925	1	0	0	0	1	1	0	0	0	1	1	0	0	0	0	0	0	0	0	1	1	0	1	0	0	1	1	1	0	0	0	1	0	0	0	320	0	37.8	0	0	0	0	0	0
0	1	0	0	45.7433	1	0	0	0	1	1	1	1	1	0	0	0	0	0	0	0	0	0	0	0	1	0	1	1	0	2	1	0	0	0	0	1	0	0	0	20	0	0	0	0	0	0	0	0
0	1	0	0	69.6676	1	0	0	1	0	0	0	0	0	1	0	0	0	0	0	0	0	0	0	0	1	0	1	1	1	1	1	1	0	0	0	1	0	0	0	45	0	0	0	0	0	0	0	0
0	1	0	0	62.4528	1	0	0	0	1	1	1	0	1	0	1	0	0	0	0	0	0	0	0	0	1	0	1	1	1	1	1	1	0	0	0	1	0	0	0	96	0	0	0	0	0	0	0	0
1	1	0	0	89.1576	1	1	0	0	1	1	1	1	0	0	1	0	0	0	0	0	1	0	0	0	1	0	1	1	0	4	1	0	0	0	0	1	0	0	0	5	0	34.8	34.8	0	0	0	0	0
0	1	0	0	58.1532	1	0	0	0	0	1	0	0	0	0	0	1	0	0	0	0	0	0	1	0	1	0	1	0	1	2	1	0	0	0	0	0	0	0	0	99	0	0	0	0	0	0	0	0
1	1	0	1	46.5756	1	0	0	0	1	1	1	0	0	0	1	0	0	0	0	0	0	0	0	0	1	1	1	1	0	4	1	1	0	0	0	1	0	0	0	18	0	36.7	35.8	0	0	0	0	0
1	1	0	0	77.5897	1	0	0	0	1	1	1	0	0	1	1	0	0	1	0	0	0	0	0	0	1	0	1	0	1	1	1	1	0	0	1	1	0	0	0	7	0	36.2	35.6	0	0	0	0	0
1	1	0	0	44.3645	1	0	0	0	1	1	0	0	0	1	0	0	0	0	0	0	0	0	0	0	1	0	1	1	0	3	1	1	0	0	1	1	0	0	0	7	1	39.5	37.2	0	0	0	0	0
1	0	0	0	73.8795	0	0	0	1	0	0	1	0	0	0	1	0	0	0	0	0	1	0	0	0	0	0	1	0	1	1	1	1	1	0	0	0	0	0	0	2	0	36.6	35.8	1	0	0	1	1
0	1	0	0	72.1183	1	1	1	1	1	0	0	0	0	0	0	1	0	0	0	0	0	0	0	0	0	0	0	1	0	1	1	1	0	0	1	0	0	0	0	95	0	0	0	0	0	0	0	0
0	1	0	0	48.824	1	0	0	0	0	1	1	0	0	0	0	1	0	1	0	0	0	0	0	0	0	0	0	1	0	2	0	0	0	0	0	0	0	0	0	40	0	0	0	0	0	0	0	0
1	1	0	0	76.4014	0	1	0	1	1	1	0	0	0	1	0	1	0	0	0	0	0	0	0	0	0	0	0	0	0	1	1	1	0	0	0	1	0	0	0	9	1	39.2	38	0	0	0	1	0
0	1	0	0	52.4967	0	0	0	0	0	1	0	0	0	0	0	0	0	0	0	0	0	0	1	0	0	0	1	0	0	2	1	0	0	0	0	0	0	0	0	27	0	0	0	0	0	0	0	0
1	1	0	0	53.0144	1	0	0	0	1	1	1	0	1	1	0	0	0	1	0	0	0	0	0	0	1	0	1	0	0	1	1	1	0	0	0	1	1	0	0	2	0	35.4	35.4	0	0	0	0	0
1	1	0	0	73.708	1	0	0	0	0	0	0	0	0	0	0	0	0	0	0	1	0	0	1	0	1	0	1	1	0	2	0	0	0	0	0	1	0	0	0	21	0	32.2	32.2	0	0	0	0	0
0	1	0	0	86.5177	1	1	0	0	1	1	1	0	1	1	0	1	0	0	0	0	0	0	0	0	1	0	1	0	0	1	1	1	0	0	1	1	0	0	0	31	0	0	0	0	0	0	0	0
0	1	1	0	53.5069	1	0	0	0	0	1	0	0	1	0	0	0	0	1	0	0	0	0	0	0	0	0	0	0	0	1	1	1	0	0	1	1	0	0	0	26	0	0	0	0	0	0	0	0
1	1	0	0	56.157	0	0	0	0	1	1	0	0	0	0	0	0	0	1	0	1	1	0	0	0	1	0	1	1	0	3	1	0	0	0	0	0	0	0	0	21	0	35.7	35.6	0	0	0	0	0
0	1	0	0	85.6494	1	0	1	0	0	0	0	0	0	0	0	0	0	0	0	0	0	0	1	0	0	0	1	0	0	1	1	1	0	0	0	1	0	0	0	48	0	0	0	0	0	0	0	0
0	1	0	0	66.7112	0	1	0	0	1	1	0	0	0	0	0	0	0	0	0	0	0	0	0	0	0	0	0	1	1	2	0	1	0	0	0	0	0	0	0	40	0	0	0	0	0	0	0	0
1	1	0	0	65.4227	1	0	0	0	0	0	0	0	0	1	0	1	0	1	0	1	1	0	0	0	0	0	1	0	1	2	1	0	0	0	0	0	0	0	0	35	1	39.6	35.2	0	0	0	0	0
0	1	0	0	67.4956	1	0	0	1	0	0	1	0	1	0	0	0	0	0	0	0	0	0	1	0	1	0	1	1	1	1	1	1	1	0	0	0	0	0	0	40	0	0	0	0	0	0	0	0
1	1	0	0	40.2579	1	0	0	0	0	1	0	0	0	0	0	0	0	0	0	0	0	0	1	0	0	0	1	1	1	2	1	0	0	0	0	1	0	0	0	70	1	38.1	36.2	0	0	0	0	0
1	1	0	0	46.203	1	0	0	0	0	0	0	0	1	0	1	1	0	0	0	0	1	0	1	0	1	0	1	0	1	2	0	0	0	0	0	0	0	0	0	5	1	39	36.8	0	0	0	1	1
1	0	0	0	37.6914	1	0	1	0	1	1	0	0	0	0	0	0	0	0	0	1	0	0	0	0	1	0	1	1	0	1	1	1	1	0	1	1	0	0	0	2	0	37.7	37	1	0	0	1	1
1	1	0	0	65.5582	1	0	0	0	0	1	1	1	0	0	1	0	0	0	0	0	0	0	0	0	0	0	0	1	0	2	0	0	0	0	0	0	1	0	0	16	1	38.2	36.1	0	0	0	1	0
1	0	0	0	67.0793	1	0	1	0	1	1	0	0	0	0	0	0	0	0	0	1	0	0	1	0	0	0	1	1	0	4	1	1	1	0	0	1	0	0	0	6	0	37.5	35	1	0	0	1	1
0	1	0	0	72.9891	1	0	0	0	0	0	0	0	1	0	0	0	0	0	0	0	0	0	0	0	0	0	0	1	1	2	0	0	0	0	0	0	0	0	0	30	0	0	0	0	0	0	0	0
0	1	0	0	45.5943	0	0	0	0	0	1	0	0	0	0	0	0	0	1	0	0	0	0	0	0	0	0	0	1	0	2	1	0	0	0	0	0	0	0	0	33	0	0	0	0	0	0	0	0
1	1	0	0	87.1151	0	1	1	0	1	1	0	0	1	0	0	0	0	0	0	0	0	0	0	0	0	0	0	1	0	4	1	1	1	0	0	1	0	0	0	15	0	37.1	35.6	0	0	0	0	0
1	1	0	0	82.7967	0	0	0	0	1	1	0	0	1	0	0	0	0	1	0	1	1	0	1	0	0	0	1	0	0	2	1	0	0	0	0	0	0	0	0	30	0	33.3	33.3	0	0	0	0	0
0	1	0	0	89.1555	1	0	1	0	0	1	1	0	0	0	1	0	0	0	0	0	0	0	0	0	0	0	0	1	1	2	0	0	0	0	0	0	0	0	0	45	0	0	0	0	0	0	0	0
0	1	0	0	80.6762	1	1	0	0	1	1	1	0	1	1	0	1	0	0	0	0	0	0	0	0	1	0	1	1	1	1	1	1	0	1	0	1	0	0	0	46	0	0	0	0	0	0	0	0
0	1	0	0	61.3808	0	0	0	0	0	1	0	0	0	1	0	1	0	0	0	0	0	0	0	0	0	0	0	0	0	2	0	0	1	0	0	0	0	0	0	33	0	0	0	0	0	0	0	0
0	1	0	0	24.7262	0	0	0	0	0	1	0	0	0	0	0	0	0	0	0	0	0	0	0	0	0	0	0	1	0	2	1	0	0	1	0	0	0	0	0	53	0	0	0	0	0	0	0	0
1	1	0	0	70.9385	0	1	0	0	0	1	0	0	0	0	0	0	0	0	0	1	1	0	0	0	0	0	1	1	1	3	1	0	0	0	0	0	0	0	0	6	0	36.7	35.6	0	0	0	0	0
1	1	0	0	78.2304	1	0	1	0	0	1	1	0	0	1	1	0	0	0	0	1	1	0	1	0	1	0	1	0	0	3	1	0	0	0	0	0	0	0	0	31	0	34.4	34.4	0	0	0	0	0
0	1	0	0	41.3456	1	0	0	0	1	1	1	0	1	0	0	0	0	1	0	0	0	0	0	0	0	0	0	0	0	1	1	1	0	1	0	1	0	0	0	45	0	0	0	0	0	0	0	0
1	1	0	0	83.9351	0	1	0	0	1	1	1	1	0	0	1	0	0	0	0	0	0	1	0	1	1	0	1	1	0	2	1	0	0	0	0	0	0	0	0	16	0	36.2	35.6	0	0	0	0	0
0	1	0	0	53.9088	1	0	1	1	1	1	0	0	0	0	0	1	1	0	0	0	0	0	0	0	1	0	1	1	1	1	1	1	0	0	0	1	0	0	0	81	0	0	0	0	0	0	0	0
0	1	0	0	83.7489	1	0	0	0	0	0	0	0	0	0	0	0	0	0	0	0	0	0	0	0	0	0	0	1	0	2	1	1	0	0	0	0	0	0	0	42	0	0	0	0	0	0	0	0
1	1	0	1	40.0145	0	1	0	1	1	1	0	0	0	0	0	0	0	0	0	0	0	0	0	0	1	1	1	1	0	1	1	1	1	1	0	1	0	0	0	21	0	36.8	35	0	0	0	0	0
0	1	0	0	66.3728	1	0	0	0	0	1	1	0	0	1	0	1	0	0	0	0	0	0	0	0	0	0	0	0	0	2	0	0	0	0	0	0	0	0	0	58	0	0	0	0	0	0	0	0
1	1	0	0	57.667	0	0	0	0	0	1	0	0	0	0	1	0	0	0	0	0	0	0	0	0	0	0	0	1	0	2	0	0	0	0	0	0	0	0	0	23	0	36.6	35.6	0	0	0	0	0
0	1	0	0	82.3284	0	0	0	0	0	0	1	0	0	0	0	0	1	1	0	0	0	0	0	0	1	0	1	0	0	2	0	0	0	0	0	0	0	0	0	150	0	33.6	0	0	0	0	0	0
1	1	0	0	69.9583	0	1	1	0	0	0	0	0	0	0	0	1	1	0	0	0	0	0	0	0	1	1	1	1	0	1	1	1	0	1	1	1	0	0	0	44	0	36	33.9	0	0	0	1	1
1	1	0	0	35.807	1	1	0	0	0	1	0	0	0	0	0	1	0	0	0	0	0	0	0	0	0	0	0	0	1	1	1	1	0	0	0	0	0	0	0	7	0	36	35.6	0	0	0	0	0
1	1	0	0	57.6866	1	0	0	0	1	1	0	0	1	1	0	1	0	0	0	0	1	0	0	0	1	0	1	1	0	1	1	1	0	1	0	1	0	0	0	6	0	35	35	0	0	0	0	0
0	1	0	0	83.6303	0	0	1	0	1	1	1	0	0	0	0	0	0	0	0	0	0	0	0	0	1	0	1	1	0	1	1	1	1	1	0	1	1	0	0	40	0	0	0	0	0	0	0	0
1	1	0	0	48.2388	1	0	1	0	0	1	0	0	0	0	0	1	0	0	0	0	0	0	0	0	1	0	1	1	0	1	1	1	0	1	0	1	0	0	0	19	0	37	36.4	0	0	0	1	1
1	1	0	0	73.1358	1	1	0	0	0	1	1	0	0	0	1	1	0	0	0	0	0	0	1	0	1	0	1	1	0	2	0	0	0	0	0	0	0	0	0	10	1	38.2	37	0	0	0	0	0
0	1	0	0	59.9313	1	0	0	0	0	0	0	0	0	0	0	0	1	0	0	0	0	0	1	1	0	0	1	1	0	2	0	0	0	0	0	0	0	0	0	96	0	0	0	0	0	0	0	0
1	1	0	0	57.1924	1	0	0	0	0	1	0	0	0	1	0	1	0	0	0	0	0	0	0	0	0	0	0	0	1	3	1	1	0	0	0	1	0	0	0	102	0	35.8	35.6	0	0	0	0	0
0	1	0	0	73.4298	1	0	0	0	0	0	0	0	0	1	1	0	0	0	0	0	0	0	1	0	0	0	1	1	0	2	0	0	0	0	0	0	0	0	0	72	0	0	0	0	0	0	0	0
1	1	0	0	76.3128	0	0	0	0	0	0	0	0	1	0	0	0	0	1	0	0	0	0	1	0	0	0	1	1	1	2	1	0	0	0	0	0	0	0	0	14	0	37.1	35.6	0	0	0	0	0
1	1	0	0	55.7153	1	0	0	0	0	1	1	0	0	0	0	1	1	0	0	0	0	0	0	0	1	0	1	1	0	2	1	0	0	1	0	0	0	0	0	36	0	37.1	35.6	0	0	0	0	0
0	1	0	0	74.8939	1	0	1	1	0	0	0	0	0	0	1	1	0	0	0	0	0	0	0	0	0	0	0	1	0	2	0	0	0	0	0	0	0	0	0	50	0	0	0	0	0	0	0	0
0	1	0	0	88.2896	1	1	0	0	1	1	1	1	0	0	0	1	1	0	0	0	0	0	1	0	1	0	1	1	0	1	1	1	1	1	0	0	0	0	0	41	0	0	0	0	0	0	0	0
1	1	0	0	57.9121	0	0	1	0	1	0	0	0	0	0	1	0	0	1	0	0	0	0	0	0	0	0	0	0	0	1	1	1	0	1	0	1	0	0	0	18	0	35	35	0	0	0	0	0
0	1	0	0	65.0578	0	0	0	0	0	0	0	0	0	0	0	0	0	1	0	0	0	0	0	0	0	0	0	0	1	2	0	0	0	0	0	0	0	0	0	33	0	0	0	0	0	0	0	0
0	1	0	0	90.5933	1	0	0	0	0	0	0	0	0	0	0	0	0	1	0	0	0	0	1	0	0	0	1	1	0	2	1	0	0	1	0	0	0	0	0	45	0	0	0	0	0	0	0	0
1	1	0	0	69.4943	0	0	0	1	1	0	0	0	1	0	1	0	0	0	0	0	1	0	1	0	0	0	1	1	0	2	1	0	1	0	0	0	0	0	0	7	0	35.4	35.4	0	0	0	0	0
0	1	0	0	81.4983	0	0	1	1	0	0	0	0	0	0	1	0	0	0	0	0	0	0	0	0	0	0	0	1	0	1	1	1	0	0	0	1	0	0	0	65	0	0	0	0	0	0	0	0
0	1	0	0	81.3743	1	0	0	0	0	0	0	0	0	0	1	0	0	1	0	0	0	0	0	0	0	0	0	1	0	2	0	0	0	0	0	0	0	0	0	33	0	0	0	0	0	0	0	0
0	1	0	0	62.9391	0	0	0	0	1	0	0	0	0	0	0	0	0	1	0	0	0	0	0	1	1	0	1	0	0	2	0	0	0	0	0	1	0	0	0	31	0	0	0	0	0	0	0	0
1	1	0	0	74.1637	0	0	0	1	0	0	1	0	0	0	1	0	0	0	0	0	0	0	0	0	1	0	1	1	1	2	0	0	0	0	0	0	0	0	0	32	0	35.7	35.6	0	0	0	0	0
1	1	0	0	80.6549	1	0	0	0	0	1	0	0	0	0	0	1	0	0	0	0	0	0	1	0	1	0	1	1	1	1	1	1	0	1	0	1	0	0	0	8	0	37.1	35.6	0	0	0	0	0
1	1	0	0	82.2493	1	0	0	1	0	1	0	0	0	0	0	1	0	0	0	0	0	0	0	1	1	0	1	0	1	2	0	1	0	0	0	0	0	0	0	40	1	39	35.2	0	0	0	0	0
1	1	0	0	67.8569	1	0	0	0	1	1	0	0	0	0	0	1	0	0	0	0	0	0	0	0	1	0	1	1	0	1	1	1	0	1	0	1	0	0	0	11	0	36.4	35.6	0	0	0	0	0
0	1	0	0	86.8966	1	0	0	1	0	1	0	0	0	0	0	1	0	0	0	0	0	0	1	0	1	0	1	1	0	2	1	1	0	1	0	1	0	0	0	36	0	0	0	0	0	0	0	0
0	1	0	0	53.2764	1	0	0	1	0	1	0	0	0	0	0	1	0	0	0	0	0	0	0	0	1	0	1	1	1	1	1	1	0	0	0	0	0	0	0	93	0	0	0	0	0	0	0	0
0	1	0	0	69.3857	1	0	0	1	0	0	0	0	0	0	0	0	0	0	0	0	0	0	0	0	0	0	0	1	0	2	0	0	0	0	0	0	0	0	0	100	0	0	0	0	0	0	0	0
1	1	0	0	31.6412	0	0	0	0	0	0	0	0	0	0	0	1	1	1	0	0	0	0	0	0	1	0	1	1	0	1	1	1	0	1	0	1	0	0	0	4	0	37.1	35.6	0	0	0	0	0
0	1	0	0	81.1581	1	0	0	0	0	0	0	0	0	0	0	0	0	1	0	0	0	0	0	0	0	0	0	1	0	2	0	0	0	0	0	0	0	0	0	23	0	0	0	0	0	0	0	0
1	1	0	0	60.1379	1	1	0	1	0	0	1	1	0	0	0	1	0	1	0	0	0	0	0	1	0	1	1	0	1	1	1	1	0	0	0	0	0	0	0	4	0	37.3	36.3	0	0	0	1	0
0	1	0	0	61.4519	1	0	0	0	0	0	0	0	0	0	0	1	0	1	0	0	0	0	0	0	0	0	0	1	0	2	0	1	0	0	0	0	0	0	0	72	0	0	0	0	0	0	0	0
0	1	0	0	35.0693	1	0	0	0	0	0	0	0	0	0	0	0	0	1	0	0	0	0	0	0	0	0	0	1	1	2	0	0	0	0	0	0	0	0	0	50	0	0	0	0	0	0	0	0
1	1	0	0	84.7265	1	0	0	0	0	1	0	0	0	0	0	1	0	0	0	0	0	0	0	0	1	0	1	0	0	1	1	1	0	1	0	1	0	0	0	10	0	35	35	0	0	0	0	0
0	1	0	0	72.4749	1	0	0	0	0	1	1	1	0	0	0	0	0	0	0	0	0	0	0	0	1	0	1	0	0	1	1	1	1	1	0	0	0	0	0	35	0	0	0	0	0	0	0	0
1	1	0	0	59.042	1	0	0	1	0	1	1	0	0	0	1	0	0	0	0	1	0	0	0	0	0	0	1	1	0	2	0	0	0	0	0	0	0	0	0	70	1	38.6	35	0	0	0	0	0
1	1	0	0	48.5473	1	0	0	0	1	0	1	0	1	1	0	0	0	0	0	1	1	0	1	0	0	0	1	1	1	2	1	1	0	0	0	0	0	0	0	18	0	35	35	0	0	0	0	0
0	1	0	0	64.5687	1	1	0	0	0	0	0	0	0	0	1	0	0	0	0	0	0	0	0	0	0	0	0	1	0	4	1	1	0	0	0	0	0	0	0	124	0	0	0	0	0	0	0	0
1	1	0	0	87.5378	0	0	0	0	0	0	0	0	0	0	0	1	0	0	0	1	0	0	0	0	1	0	1	1	0	2	1	0	0	0	0	0	0	0	0	69	0	34.6	34.6	0	0	0	0	0
1	1	0	0	63.8865	1	0	1	0	0	0	1	0	0	0	1	0	0	0	0	1	0	0	0	0	1	0	1	0	0	2	0	0	0	0	0	0	0	0	0	13	1	38	36.1	0	0	0	0	0
1	1	0	0	47.7903	1	0	0	0	0	0	0	0	0	0	1	0	0	0	0	0	0	0	0	0	0	0	0	0	0	2	0	0	0	0	0	0	0	0	0	13	0	37.1	35.6	0	0	0	0	0
0	1	0	0	56.5669	0	0	0	0	0	0	0	0	1	0	1	0	0	0	0	0	0	0	1	0	1	0	1	1	1	1	1	1	0	1	0	1	1	0	0	7	0	0	0	0	0	0	0	0
1	1	0	0	78.8451	1	0	0	0	0	1	0	0	0	0	0	1	0	0	0	0	0	1	0	0	1	0	1	1	0	2	0	0	0	0	0	0	0	0	0	6	0	37.8	35.6	0	0	0	1	0
1	1	0	0	52.0846	1	0	0	0	0	0	1	1	1	0	0	0	0	0	0	0	0	0	0	0	0	0	0	1	0	1	1	1	0	0	0	1	0	0	0	8	0	36.8	35.8	0	0	0	1	1
0	1	0	0	41.9091	1	0	0	0	0	0	0	0	0	0	0	0	0	1	0	0	0	0	1	0	1	0	1	1	0	2	1	1	0	1	0	1	0	0	0	33	0	0	0	0	0	0	0	0
1	1	0	0	64.2242	1	1	0	0	0	0	0	0	0	0	0	0	0	0	0	0	0	0	0	0	1	0	1	1	1	2	0	1	0	0	0	0	0	0	0	15	1	39.4	38.2	0	0	0	0	0
0	1	0	0	80.9518	1	0	0	0	0	1	1	0	0	0	0	1	0	0	0	0	0	0	0	0	1	0	1	0	0	1	1	1	0	1	0	1	0	0	0	30	0	0	0	0	0	0	0	0
0	1	0	0	49.4302	1	0	0	0	1	0	0	0	0	0	0	1	0	0	0	0	0	0	1	0	0	0	1	0	1	2	0	0	0	0	0	0	0	0	0	62	0	0	0	0	0	0	0	0
1	1	0	0	70.7958	0	0	0	0	0	1	1	0	1	0	0	0	1	1	0	1	1	0	1	0	0	0	1	1	0	2	1	1	0	0	0	0	0	0	0	17	0	36.3	34.8	0	0	0	0	0
1	0	0	0	60.0711	1	0	1	1	0	1	1	0	0	0	0	1	0	0	0	0	0	0	0	0	0	0	0	1	0	1	1	1	1	1	0	0	0	0	0	19	0	37.8	36.2	0	0	0	1	1
0	1	0	0	97.0035	0	1	0	0	0	1	1	0	0	0	0	1	0	0	0	0	0	0	0	0	0	0	0	0	0	2	1	1	0	0	0	0	0	0	0	37	0	0	0	0	0	0	0	0
1	1	0	0	54.748	1	0	0	0	0	0	0	0	0	0	0	0	0	1	0	0	0	0	0	0	0	0	0	0	0	2	0	0	0	0	0	0	0	0	0	9	0	37.2	36.2	0	0	0	1	0
0	1	1	0	57.4965	1	0	0	0	0	1	0	0	0	0	0	0	0	1	0	0	0	0	1	0	0	0	1	0	1	2	0	0	0	0	0	0	0	0	0	48	0	0	0	0	0	0	0	0
1	1	0	0	71.3749	0	0	0	0	0	0	0	0	0	0	0	0	0	1	0	0	0	0	0	1	0	0	1	0	0	2	1	0	0	0	0	0	0	0	0	16	0	36.1	35.6	0	0	0	0	0
1	1	0	0	68.9764	1	1	0	0	0	1	1	1	0	0	1	1	0	0	0	0	0	0	0	0	1	0	1	0	0	1	1	1	1	1	0	1	1	0	0	36	0	36.6	36	0	0	0	0	0
1	1	0	0	57.4457	1	0	0	0	0	0	0	0	0	0	0	1	0	0	0	0	0	0	0	0	1	1	1	1	1	2	0	0	0	0	0	1	0	0	0	16	0	34.5	33.2	0	0	0	0	0
0	1	0	0	27.551	0	0	0	0	0	0	1	0	0	0	0	0	0	0	0	0	0	0	0	0	1	0	1	1	0	1	1	1	0	1	0	0	0	0	0	17	0	0	0	0	0	0	0	0
1	1	0	0	62.4486	1	0	0	0	0	0	1	0	1	0	1	0	0	0	0	0	0	0	0	0	0	0	0	0	0	2	0	0	0	0	0	0	0	0	0	30	1	40	35.6	0	0	0	0	0
1	1	0	0	43.5784	1	0	0	0	0	0	0	0	0	0	0	0	0	1	0	0	0	0	0	0	0	0	0	1	0	3	1	1	0	0	0	0	0	0	0	5	0	36.1	35.6	0	0	0	0	0
0	1	0	0	59.5377	0	0	0	0	0	0	0	0	0	0	0	0	1	1	0	0	0	0	0	0	0	0	0	1	0	2	1	0	0	0	0	0	0	0	0	70	0	0	0	0	0	0	0	0
1	0	0	0	70.1158	1	1	0	0	0	0	0	0	0	0	1	0	0	0	0	0	0	0	0	0	0	0	0	1	0	1	1	1	1	0	0	0	0	0	0	10	0	36.7	35	0	0	0	1	1
1	1	0	0	42.0006	0	0	0	0	0	1	0	0	0	0	0	1	0	1	0	1	0	0	0	0	1	0	1	1	0	1	1	1	0	1	0	0	0	0	0	5	1	40.2	35.6	0	0	0	0	0
1	1	0	0	49.6452	1	0	0	0	0	0	0	0	0	0	1	1	0	1	0	1	1	0	1	0	0	0	1	1	1	2	1	0	0	0	0	0	0	0	0	14	0	34.4	34.4	0	0	0	0	0
1	1	0	0	65.7872	0	0	0	0	0	1	0	0	0	0	0	0	1	1	0	0	0	0	0	0	0	0	0	1	1	2	0	0	0	0	0	0	0	0	0	20	0	35.8	35.6	0	0	0	0	0
0	1	0	0	76.5657	1	1	0	0	0	0	1	1	0	0	0	1	0	0	0	0	0	0	0	0	1	0	1	0	0	1	1	1	0	1	0	1	0	0	0	28	0	0	0	0	0	0	0	0
1	1	0	0	85.8157	1	1	1	0	0	0	1	0	0	0	1	0	0	0	0	0	0	1	1	0	0	1	1	1	0	1	1	1	0	0	0	0	0	0	0	4	1	39.2	37.2	0	0	0	0	0
1	1	0	0	71.2851	1	0	0	1	0	1	0	0	0	0	0	0	0	0	0	0	0	0	0	0	0	0	0	1	0	2	0	1	0	0	0	0	0	0	0	49	0	37.2	34.4	0	0	0	1	0
1	0	0	0	64.7631	1	0	0	0	1	0	0	0	0	0	0	0	0	1	0	0	0	0	0	0	0	0	0	1	0	2	1	0	0	0	0	0	0	0	0	13	0	37.2	36.5	0	0	0	1	1
1	1	0	0	64.6011	1	0	0	0	0	0	0	0	0	0	0	0	0	0	0	1	0	1	0	0	0	1	1	0	1	2	1	0	0	0	0	0	0	0	0	18	0	36.5	33.7	0	0	0	0	0
1	1	0	0	53.6028	1	0	1	0	1	0	1	0	0	0	0	1	0	1	0	0	0	0	0	0	0	1	1	0	0	2	0	0	0	0	0	0	0	0	0	5	0	35.1	35.1	0	0	0	0	0
1	1	0	0	69.4931	1	0	0	0	0	0	0	0	0	0	0	0	0	1	0	0	1	0	1	0	0	0	1	0	0	2	0	0	0	0	0	0	0	0	0	13	0	37.4	35.8	0	0	0	0	0
0	1	0	0	59.6621	1	1	0	0	0	0	0	1	0	0	0	1	0	0	0	0	0	0	1	0	1	0	1	0	1	1	1	1	0	0	0	1	1	0	0	96	0	0	0	0	0	0	0	0
0	1	0	0	76.2171	0	0	0	0	0	0	1	1	1	0	1	0	0	0	0	0	0	0	1	0	1	0	1	1	1	1	1	1	0	0	0	0	1	0	0	53	0	0	0	0	0	0	0	0
0	1	0	0	81.0166	0	0	0	0	0	0	1	0	0	0	1	1	0	0	0	0	0	0	0	0	1	0	1	1	0	2	0	0	1	0	0	0	0	0	0	74	0	0	0	0	0	0	0	0
0	1	0	0	79.3464	1	1	0	0	0	0	1	1	0	0	0	1	1	0	0	0	0	0	0	0	0	0	0	1	0	1	1	1	1	0	1	1	0	0	0	49	0	0	0	0	0	0	0	0
0	1	0	0	77.1835	1	1	0	1	0	0	1	0	0	0	1	0	0	0	0	0	0	0	0	0	1	0	1	1	1	2	0	0	0	0	0	0	0	0	0	60	0	0	0	0	0	0	0	0
0	1	0	0	61.1975	1	0	0	0	0	0	0	0	0	0	0	1	0	0	0	0	0	0	0	0	0	0	0	0	0	2	0	0	0	0	0	0	0	0	0	58	0	0	0	0	0	0	0	0
0	1	0	0	27.6779	0	1	0	1	0	0	0	0	0	0	0	0	0	0	0	0	0	0	0	0	0	0	0	0	0	2	0	0	1	0	0	1	0	0	0	180	0	0	0	0	0	0	0	0
1	0	0	0	82.813	1	0	1	1	0	0	1	1	0	1	0	0	1	0	0	0	0	0	1	0	0	1	1	0	0	1	1	1	1	1	0	1	0	0	0	33	1	38	36.8	0	0	0	0	0
0	1	0	0	61.9232	0	1	1	0	0	0	1	1	0	0	0	0	1	0	0	0	0	0	0	0	1	0	1	0	1	1	1	1	0	0	0	0	0	0	0	29	0	0	0	0	0	0	0	0
0	1	0	0	56.3912	1	1	0	0	0	0	1	1	0	0	1	1	0	0	0	0	0	0	0	0	0	0	0	1	0	1	1	1	1	0	0	1	0	0	0	36	0	0	0	0	0	0	0	0
1	1	0	0	56.5929	1	0	1	0	0	0	1	1	0	0	0	0	0	0	0	1	0	0	0	0	0	0	1	0	0	1	1	1	1	0	1	1	0	0	0	10	0	36.3	35.4	0	0	0	1	1
1	1	0	0	64.3373	0	0	0	0	0	0	1	1	0	1	1	0	0	0	0	0	0	0	0	0	1	0	1	1	0	2	0	0	0	0	0	0	0	0	0	20	0	37.8	34.5	0	0	0	0	0
1	1	0	0	67.6075	1	0	0	1	0	1	1	0	0	1	0	0	0	0	0	0	0	0	0	0	1	0	1	0	0	1	1	1	0	0	1	1	0	0	0	6	0	36.6	34.6	0	0	0	1	0
1	1	0	0	59.1705	1	0	0	0	1	1	1	1	0	1	0	0	0	1	0	0	1	0	0	0	0	0	1	1	0	1	1	1	0	0	0	1	1	0	0	15	1	38.2	35.4	0	0	0	1	0
0	1	0	0	65.6809	1	0	0	0	1	0	0	0	0	0	0	0	0	0	0	0	0	1	0	1	1	0	1	1	0	1	1	1	0	0	0	1	0	0	0	152	0	35.8	32	0	0	0	0	0
0	1	0	0	58.0875	1	0	0	0	0	1	0	0	0	1	0	1	0	0	0	0	0	0	0	0	0	0	0	0	0	2	1	1	0	0	0	0	0	0	0	26	0	0	0	0	0	0	0	0
1	1	0	0	63.3173	1	1	0	0	0	1	1	1	0	0	1	1	0	0	0	1	0	0	0	0	0	1	1	0	0	2	1	0	1	0	1	0	0	0	0	13	0	36.8	36	0	0	0	1	1
0	1	0	0	51.905	1	0	0	0	1	1	0	0	1	1	0	0	0	1	0	0	0	0	0	0	0	0	0	1	0	2	1	0	0	0	0	0	0	0	0	55	0	0	0	0	0	0	0	0
0	1	0	0	58.8182	0	1	0	0	1	1	1	1	1	1	1	0	0	0	0	0	0	0	0	0	1	0	1	0	0	1	1	1	0	0	0	1	1	0	0	15	0	0	0	0	0	0	0	0
0	1	0	0	32.7194	1	0	0	0	1	1	0	0	0	0	1	1	0	0	0	0	0	0	0	0	1	0	1	1	0	1	1	1	0	0	0	1	0	0	0	31	0	0	0	0	0	0	0	0
1	1	0	0	77.1615	1	0	0	0	0	1	1	0	1	1	0	1	0	0	0	0	1	0	0	0	1	0	1	1	0	2	1	0	0	0	0	0	0	0	0	31	0	36.8	35.8	0	0	0	0	0
1	1	0	0	54.701	1	0	0	0	0	0	0	0	0	1	0	0	0	1	0	0	0	0	0	0	1	0	1	0	1	3	1	0	0	0	0	1	0	0	0	33	0	37.6	34.8	0	0	0	0	0
1	1	0	0	47.754	1	0	0	0	0	0	0	1	1	1	1	0	0	0	0	1	0	0	1	0	0	0	1	1	1	2	1	0	0	0	0	1	0	0	0	17	1	38.2	36.8	0	0	0	0	0
0	1	0	0	75.7176	1	0	0	0	0	1	0	0	1	1	0	1	0	0	0	0	0	0	1	0	0	0	1	1	0	2	0	0	0	0	0	0	0	0	0	59	0	0	0	0	0	0	0	0
1	1	0	0	77.074	0	0	0	0	1	1	1	0	0	1	1	1	0	0	0	1	0	0	1	0	0	0	1	1	0	2	1	1	0	0	0	1	1	0	0	12	0	37.8	36.2	0	0	0	0	0
1	0	0	0	36.4365	1	0	0	0	0	1	0	0	0	1	0	1	0	0	0	0	0	0	1	0	0	0	1	0	0	1	1	1	0	0	0	0	0	0	0	5	1	39	36	0	0	0	1	1
0	1	0	0	69.4876	1	0	0	0	1	0	0	0	0	1	1	0	0	0	0	0	0	0	1	0	1	0	1	0	1	1	1	1	1	0	0	1	0	0	0	58	0	0	0	0	0	0	0	0
1	1	0	0	61.1906	1	0	0	0	1	1	1	1	0	1	1	1	0	1	0	0	0	0	0	0	1	0	1	1	0	4	1	1	0	0	0	1	0	0	0	27	0	37.1	35.6	0	0	0	0	0
1	0	0	0	73.8059	1	0	0	0	1	1	1	0	1	1	0	0	0	0	0	1	0	0	0	0	1	0	1	0	0	1	1	1	0	0	0	1	0	0	0	14	0	37.2	35.5	0	0	0	0	0
1	1	0	0	77.9425	0	0	0	0	0	1	1	0	0	1	1	0	0	1	0	0	0	0	1	0	0	0	1	0	0	2	0	0	1	0	0	0	0	0	0	16	0	37.5	36.4	0	0	0	0	0
0	1	0	0	68.8341	0	0	0	0	0	1	1	0	1	1	1	0	0	1	0	0	0	0	0	0	1	0	1	0	0	1	1	1	0	0	0	1	0	0	0	38	0	0	0	0	0	0	0	0
0	1	0	0	76.3726	1	0	0	0	0	1	0	0	0	1	1	0	0	1	0	0	0	0	1	0	0	0	1	1	0	2	1	1	0	0	0	0	0	0	0	65	0	0	0	0	0	0	0	0
1	1	0	0	59.9496	1	1	0	1	0	1	1	0	0	0	0	0	0	0	0	1	0	0	0	0	0	0	1	0	0	2	1	1	1	0	1	1	0	0	0	32	0	35.5	34.8	0	0	0	0	0
1	1	0	0	80.7115	1	1	0	1	0	1	1	0	0	1	1	1	0	0	0	0	0	0	0	0	1	1	1	1	0	2	1	1	0	0	0	1	0	0	0	9	0	34.5	34.5	0	0	0	0	0
0	1	0	0	56.4214	1	0	0	0	1	1	1	NA	1	1	1	1	1	0	0	0	0	0	0	0	0	0	0	1	1	2	1	0	0	0	0	0	0	0	0	40	0	0	0	0	0	0	0	0
1	1	0	0	63.4178	0	0	0	0	0	1	0	0	0	1	0	1	0	1	0	0	0	0	0	0	0	0	0	0	1	2	0	0	0	0	0	0	0	0	0	22	1	38.3	36.8	0	0	0	0	0
1	1	0	0	70.154	0	0	0	0	1	1	0	0	1	1	0	0	0	1	0	1	1	0	1	0	0	1	1	1	0	2	1	1	1	0	0	0	0	0	0	79	0	35.6	32.1	0	0	0	0	0
0	1	0	0	54.9762	1	0	0	0	1	1	0	0	1	1	0	1	0	0	0	0	0	0	0	0	1	0	1	1	1	1	1	1	0	0	0	1	0	0	0	64	0	0	0	0	0	0	0	0
1	1	0	0	74.1593	1	0	0	0	1	1	0	0	0	1	0	0	0	1	0	0	1	0	1	0	0	0	1	0	0	2	1	0	0	0	0	0	0	0	0	97	1	38.9	37.8	0	0	0	0	0
0	1	0	0	32.4418	1	0	0	0	1	0	0	1	1	0	0	0	0	0	0	0	0	1	1	0	1	0	1	0	0	1	1	1	0	0	0	1	0	0	0	20	0	0	0	0	0	0	0	0
1	1	0	0	40.8137	1	0	0	0	1	1	0	0	1	1	0	0	0	1	0	0	1	0	0	1	0	0	1	1	0	1	1	1	0	0	0	1	0	0	0	3	0	37.3	33.1	0	0	0	0	0
0	1	0	0	39.0019	1	0	0	1	1	1	1	0	1	1	0	1	1	0	0	0	0	0	0	0	0	0	0	0	1	1	1	1	1	0	1	1	0	0	0	139	0	0	0	0	0	0	0	0
1	1	0	0	85.8289	1	0	1	0	0	1	0	0	0	1	0	0	0	0	0	0	0	0	0	0	1	0	1	1	0	1	1	1	0	0	0	1	0	0	0	9	1	38	36.1	0	0	0	0	0
1	1	0	0	50.0908	0	1	0	0	1	1	0	1	1	1	0	1	0	0	0	0	0	0	0	0	1	1	1	0	0	1	1	1	0	0	0	1	0	1	0	10	0	35.8	33.4	0	0	0	0	0
0	1	0	0	85.0358	1	1	1	0	0	0	1	0	0	1	1	0	0	0	0	0	0	0	0	0	1	0	1	0	1	1	1	1	0	0	0	1	0	0	0	73	0	0	0	0	0	0	0	0
1	1	0	0	88.6007	0	1	0	0	0	1	1	0	0	1	1	1	0	0	0	1	0	0	1	0	1	0	1	0	0	2	0	1	0	0	0	0	0	0	0	38	0	37	35	0	0	0	0	0
1	1	0	0	61.4244	1	1	0	0	0	1	1	0	1	1	0	0	0	0	0	0	0	0	0	0	0	1	1	1	0	2	0	1	0	0	0	1	0	0	0	29	0	37.3	37.1	0	0	0	0	0
1	1	0	0	85.2279	1	0	1	0	0	1	0	0	0	0	0	0	0	0	0	0	0	0	0	1	0	0	1	0	0	2	0	0	0	0	0	0	0	0	0	17	0	37.1	35.6	0	0	0	0	0
1	1	0	0	86.4428	0	1	0	1	1	0	0	0	0	0	0	0	0	1	0	0	0	0	0	0	0	0	0	1	0	2	1	0	0	0	0	1	0	0	0	26	0	36.1	35.6	0	0	0	0	0
1	1	0	0	58.8018	1	0	0	1	1	0	0	0	0	0	1	0	0	0	0	0	0	0	0	0	0	0	0	0	0	2	1	0	0	0	0	0	0	0	0	5	1	41.1	36.8	0	0	0	0	0
0	1	0	0	82.821	1	0	1	0	0	0	0	0	0	0	0	0	0	1	0	0	0	1	0	1	1	0	1	0	0	1	1	1	0	0	0	0	0	0	0	29	0	0	0	0	0	0	0	0
1	1	0	0	60.2942	0	0	0	0	0	0	0	0	1	0	0	0	0	1	0	1	1	0	1	0	0	0	1	0	0	2	0	0	0	0	0	0	0	0	0	7	0	37.2	35.6	0	0	0	0	0
1	1	0	0	86.5294	0	0	0	0	0	0	0	0	0	0	0	0	0	0	0	0	0	0	1	0	0	0	1	1	0	2	0	0	0	0	0	0	0	0	0	12	0	35.6	35.6	0	0	0	0	0
0	1	0	1	72.1124	0	1	0	0	1	1	1	0	0	1	1	0	0	0	0	1	1	0	0	0	1	0	1	1	1	1	1	1	0	1	0	1	1	0	0	14	0	36.8	0	0	0	0	0	0
1	1	0	0	95.879	1	0	0	0	0	0	0	0	0	1	1	1	0	0	0	0	0	0	0	0	1	0	1	1	1	3	0	1	0	1	0	0	0	0	0	23	0	36.6	36.2	0	0	0	0	0
1	1	0	0	74.6853	0	0	1	1	1	1	0	0	0	0	0	0	0	1	0	0	0	0	0	0	1	0	1	1	0	4	1	1	0	1	0	1	0	0	1	4	1	39.9	35.2	0	0	0	0	0
1	1	0	0	72.814	1	0	0	0	0	1	0	0	0	0	0	1	0	0	0	0	0	0	1	0	1	0	1	1	0	1	1	1	1	1	1	1	0	0	0	12	0	36.5	35.9	0	0	0	0	0
1	1	0	1	49.8673	1	0	1	0	0	0	0	0	0	0	0	0	0	0	0	0	0	0	0	0	1	1	1	1	1	4	0	1	1	0	0	0	0	0	0	20	0	37.6	34.4	1	0	0	0	0
0	1	0	0	50.0604	1	0	0	0	0	1	1	0	0	0	0	0	0	0	0	0	0	0	1	0	1	0	1	0	0	4	1	0	0	1	0	0	0	0	0	18	0	0	0	0	0	0	0	0
0	1	0	0	29.9111	0	0	0	0	0	1	0	0	0	0	0	1	0	0	0	0	0	0	0	0	1	0	1	1	1	2	0	0	0	0	0	0	0	0	0	40	0	0	0	0	0	0	0	0
0	1	0	0	62.6202	0	0	0	0	1	1	0	0	0	0	0	0	0	0	0	0	0	0	1	0	1	0	1	1	1	1	1	1	0	1	0	1	0	0	0	35	0	0	0	0	0	0	0	0
0	1	0	0	55.4716	1	1	0	0	1	0	1	0	0	0	1	0	0	0	0	0	0	0	1	0	1	0	1	1	0	2	1	1	0	0	0	1	0	0	0	42	0	0	0	0	0	0	0	0
1	1	0	0	60.6608	0	0	0	1	0	0	1	0	0	0	0	0	0	1	0	0	0	0	0	0	0	0	0	0	0	2	0	0	1	0	0	0	0	0	0	7	0	36.6	35.6	0	0	0	0	0
1	1	0	0	62.5213	0	0	1	0	0	0	0	0	0	0	1	0	0	0	0	0	0	0	1	0	0	0	1	1	0	2	1	1	1	0	0	0	0	0	0	3	0	36.4	35.4	1	0	0	1	0
0	1	0	0	48.3109	1	0	0	0	1	1	1	0	1	1	0	0	0	0	0	0	0	0	1	0	1	0	1	0	0	2	1	0	0	1	0	0	0	0	0	60	0	0	0	0	0	0	0	0
1	1	0	0	60.6724	0	1	0	1	0	1	0	0	0	0	1	0	0	0	0	1	0	0	0	0	1	0	1	0	0	3	1	1	0	1	0	0	0	0	0	28	1	38.3	31.8	0	1	0	1	1
1	1	0	0	83.4241	1	0	0	0	1	1	0	0	1	0	0	0	0	0	0	0	0	0	0	0	1	0	1	0	0	2	1	0	0	1	0	1	0	0	0	50	0	37.1	35.6	0	0	0	0	0
1	1	0	0	64.4296	1	0	0	0	0	1	1	0	0	0	1	0	0	0	0	1	0	0	0	0	0	0	1	1	0	3	0	0	0	0	0	0	0	0	0	10	0	36.2	32	1	1	0	1	1
0	1	0	0	80.8528	0	0	1	1	0	0	1	0	0	0	1	1	0	0	0	0	0	0	0	0	0	0	0	0	0	4	1	1	0	0	0	0	1	0	0	26	0	0	0	0	0	0	0	0
1	1	0	0	61.9016	1	1	0	1	0	0	0	0	0	0	0	0	0	0	0	0	0	0	0	0	0	0	0	0	0	3	0	0	0	0	0	0	0	0	0	11	0	36	32.8	0	1	0	0	0
1	0	0	0	80.3678	1	1	1	1	0	0	0	0	0	0	0	0	0	0	0	0	0	0	0	0	0	0	0	0	1	1	1	1	1	0	1	0	0	0	0	10	0	37.3	35.5	1	0	0	1	1
1	1	0	0	35.7147	0	0	0	0	0	0	1	1	0	0	0	0	0	0	0	0	0	0	0	0	0	0	0	1	0	2	0	0	0	0	0	0	0	0	0	61	0	35.9	35.6	0	0	0	0	0
1	1	0	0	80.8718	1	0	1	0	0	0	0	0	0	0	1	0	0	0	0	0	0	0	0	0	0	0	0	0	0	2	1	0	0	0	0	0	0	0	0	82	0	37.1	35.6	0	0	0	0	0
0	1	0	0	49.4085	0	0	0	0	0	1	0	0	0	0	0	1	0	1	0	0	0	0	0	0	0	0	0	0	0	2	0	0	0	0	0	0	0	0	0	41	0	0	0	0	0	0	0	0
1	1	0	0	51.4666	0	0	0	0	0	1	0	0	0	0	0	0	0	1	0	0	0	0	1	0	0	0	1	1	1	2	1	1	0	0	0	0	0	0	0	22	0	37.7	36	0	0	0	0	0
0	1	0	0	47.2162	0	0	0	0	1	1	1	0	0	0	0	1	0	0	0	0	0	0	0	0	1	0	1	1	0	1	1	1	0	1	0	1	0	0	0	32	0	0	0	0	0	0	0	0
1	0	0	0	67.0515	1	0	0	0	1	0	0	0	0	0	0	1	0	0	0	0	0	0	0	0	0	0	0	0	1	2	0	0	0	0	0	0	0	0	0	9	0	37.5	36.4	0	0	0	0	0
0	1	0	0	72.3211	1	0	0	0	0	0	0	0	0	0	1	0	0	1	0	0	0	0	0	0	0	0	0	1	0	2	0	0	0	0	0	0	0	0	0	63	0	0	0	0	0	0	0	0
1	1	0	0	74.0923	1	0	1	0	0	0	1	0	0	0	1	1	0	0	0	1	1	0	0	0	1	0	1	1	0	2	0	0	0	0	0	0	0	0	0	16	0	37.1	35.6	0	0	0	0	0
0	1	0	0	74.538	1	0	0	0	0	1	1	0	1	1	1	0	0	0	0	0	0	0	0	0	0	0	0	1	1	2	1	1	0	0	0	0	0	0	0	44	0	0	0	0	0	0	0	0
1	1	0	0	48.1855	0	0	1	0	0	0	1	0	0	0	0	0	0	1	0	0	0	0	0	0	0	0	0	1	0	2	0	0	0	0	0	0	0	0	0	8	1	38.3	36.6	0	0	0	0	0
1	1	0	0	82.3151	1	0	1	0	1	0	0	0	0	0	0	0	0	0	0	1	0	0	0	0	0	1	1	0	1	4	1	1	1	0	0	1	0	0	1	17	0	37.4	34.7	1	0	0	1	1
1	1	0	0	88.9117	0	1	0	1	0	0	1	1	0	0	0	0	0	0	0	0	0	0	0	0	1	0	1	1	0	1	1	1	0	0	0	0	1	0	0	10	0	35.4	35.4	0	0	0	0	0
1	1	0	0	46.0916	1	1	0	0	1	0	1	1	0	0	1	0	0	0	0	0	0	0	0	0	1	0	1	1	0	2	0	0	0	0	0	0	0	0	0	10	0	36	35.6	0	0	0	0	0
0	1	1	0	57.1136	0	1	0	0	0	0	1	1	0	0	0	0	0	0	0	0	0	0	0	0	0	0	0	1	0	2	0	0	0	0	0	0	1	0	0	43	0	0	0	0	0	0	0	0
0	1	0	0	78.9683	0	0	1	0	0	0	0	0	0	0	0	0	0	0	0	0	0	0	1	0	0	0	1	1	0	2	1	0	0	0	0	0	0	0	0	33	0	0	0	0	0	0	0	0
1	1	0	0	75.6415	1	0	1	1	1	1	1	0	1	1	0	1	0	0	0	0	0	0	0	0	0	0	0	1	1	1	1	1	0	1	0	1	0	1	0	17	0	37.7	35.6	0	0	0	0	0
1	0	0	0	93.19	0	0	0	1	0	0	1	1	0	0	1	0	0	0	0	0	0	0	0	0	0	0	0	0	1	2	0	0	0	0	0	0	1	0	0	3	0	37.3	36.4	1	0	0	0	0
0	1	0	0	56.6629	1	1	0	0	1	1	1	0	1	0	0	0	0	0	0	0	0	0	0	0	1	0	1	1	1	1	1	1	0	1	1	1	0	0	0	29	0	0	0	0	0	0	0	0
1	1	0	1	74.4785	0	0	0	0	0	0	0	0	0	0	0	0	0	0	0	1	0	0	0	0	0	1	1	1	0	2	1	0	0	0	0	0	0	0	0	42	0	36.8	33.7	0	0	0	0	0
0	1	0	0	60.5265	0	0	0	0	1	1	1	0	1	0	0	1	0	1	0	0	0	0	1	0	1	0	1	1	0	1	1	1	0	1	0	1	1	0	0	135	0	0	0	0	0	0	0	0
1	1	0	0	82.2511	0	0	0	1	1	0	1	1	0	0	0	0	0	0	0	0	0	0	0	0	1	0	1	1	1	2	1	1	0	0	0	0	0	0	0	32	0	36.3	35.6	0	0	0	0	0
1	1	0	0	89.56	0	0	0	1	0	0	0	0	0	0	0	0	0	0	0	0	0	0	0	0	0	0	0	1	0	2	1	1	0	0	0	0	0	0	0	48	0	37.8	36.5	0	0	0	1	0
1	1	0	1	73.9481	1	0	0	0	0	1	1	0	0	0	0	0	0	0	0	1	1	0	0	0	1	0	1	0	1	1	1	1	0	1	0	0	0	0	0	10	0	37	35.7	0	0	0	0	0
1	1	0	0	59.192	1	1	0	1	1	1	1	0	1	1	1	0	0	0	0	1	0	1	0	0	1	0	1	1	0	1	1	1	0	0	1	0	0	0	0	5	1	40.7	37.3	0	0	0	0	0
1	1	0	1	35.791	0	0	0	1	1	1	1	1	1	1	1	0	0	0	0	1	0	0	0	0	1	1	1	0	1	1	1	1	0	0	0	1	0	0	0	45	0	36.7	30.9	0	0	0	0	0
1	1	0	0	74.9238	1	0	0	0	0	1	1	0	0	0	1	0	0	0	0	0	1	0	0	0	0	0	1	1	0	2	0	0	0	0	0	0	0	0	0	21	0	35.4	32.1	0	1	0	0	0
1	1	0	1	58.2361	1	1	0	1	1	0	1	0	0	1	0	0	0	0	0	0	0	0	0	0	0	0	0	1	0	1	1	1	1	0	0	1	1	0	0	42	0	37.2	22.8	0	0	0	0	0
1	1	0	0	79.8559	0	0	0	1	0	0	0	0	0	0	0	1	0	0	0	0	0	0	0	0	1	0	1	0	0	3	0	0	0	0	0	0	0	0	0	31	1	39.1	35.9	0	0	0	1	0
1	1	0	0	69.7895	0	0	0	0	0	0	1	0	1	0	0	0	0	0	0	0	0	0	0	0	0	0	0	0	0	2	1	1	0	0	0	0	0	0	0	5	0	35	35	0	0	0	0	0
0	1	0	0	76.4231	1	1	0	0	1	1	1	0	0	0	1	0	0	0	0	0	0	0	0	0	0	0	0	0	0	2	1	0	0	0	0	1	0	0	0	59	0	0	0	0	0	0	0	0
1	1	0	0	77.2731	0	1	0	1	0	0	0	0	0	0	1	0	0	0	0	1	0	0	0	0	0	0	1	1	0	2	0	0	1	0	0	0	0	0	0	18	0	36.5	31.5	0	1	0	0	0
1	1	0	0	63.6267	1	0	0	0	0	0	1	1	0	0	0	0	0	0	0	0	0	0	0	0	0	0	0	0	0	3	0	0	0	0	0	0	0	0	0	11	0	36.2	35.6	0	0	0	0	0
1	1	0	1	36.607	0	0	0	0	0	1	0	0	0	0	0	0	0	0	0	0	1	0	1	0	0	0	1	0	1	1	1	1	0	1	0	0	0	0	0	23	0	36.7	35.3	0	0	0	0	0
1	1	0	0	57.7386	0	0	0	0	0	0	1	1	0	1	0	0	0	0	0	0	0	0	0	0	0	0	0	1	1	2	0	0	0	0	0	0	1	0	0	66	0	37.2	35.6	0	0	0	0	0
1	1	0	0	62.2295	0	0	0	0	0	1	1	0	0	1	0	1	0	1	0	0	1	0	0	0	0	0	1	1	1	3	1	1	0	0	0	0	0	0	0	11	0	36.2	35.6	0	0	0	0	0
1	1	0	0	87.3623	1	0	0	0	0	0	0	0	0	0	0	0	0	0	0	0	0	0	0	0	0	1	1	1	0	2	0	0	0	0	0	0	0	0	0	24	1	38.4	35.1	0	0	0	0	0
0	1	0	0	83.7913	0	0	0	0	0	0	1	1	0	1	1	0	0	0	0	0	0	0	0	0	0	0	0	1	0	2	0	0	1	0	0	0	0	0	0	31	0	0	0	0	0	0	0	0
1	0	0	0	59.7075	1	1	0	1	0	0	1	0	0	0	1	1	1	0	0	0	0	0	0	0	1	0	1	1	0	2	0	1	0	0	0	0	0	0	0	13	0	36.2	35.1	1	0	0	0	0
1	0	0	0	74.541	1	0	1	0	0	1	1	0	0	0	1	0	0	0	0	0	0	0	0	0	1	0	1	1	0	1	1	1	0	1	1	0	0	0	0	3	0	36.6	36.2	0	0	0	0	0
1	1	0	0	78.3365	1	0	0	0	1	1	1	0	1	1	0	0	0	1	0	1	0	0	0	0	0	1	1	0	0	2	1	0	0	0	0	1	0	0	0	4	0	35.9	35.3	0	0	0	0	0
0	1	0	0	82.5449	0	1	1	0	1	1	1	0	0	0	1	0	0	0	0	0	0	0	0	1	0	0	1	0	0	1	1	1	0	0	0	1	0	0	0	40	0	0	0	0	0	0	0	0
0	1	0	0	76.7697	0	1	0	1	1	1	1	0	0	1	0	1	0	0	0	0	0	0	0	0	1	0	1	1	1	1	1	1	0	1	1	1	1	0	0	23	0	0	0	0	0	0	0	0
0	1	0	0	77.2271	0	0	1	1	1	1	0	0	0	0	1	0	0	0	0	0	0	0	0	0	1	0	1	1	1	4	1	1	0	1	1	1	0	0	0	52	0	0	0	0	0	0	0	0
0	1	0	0	69.1861	1	0	0	0	1	1	0	0	0	0	0	1	0	0	0	0	0	0	0	0	0	0	0	1	0	1	1	1	0	1	0	1	0	0	0	30	0	0	0	0	0	0	0	0
0	1	0	0	82.0787	1	1	0	0	0	0	0	0	0	0	0	0	0	0	0	0	0	0	1	0	0	0	1	1	1	2	0	0	1	0	0	0	0	0	0	67	0	0	0	0	0	0	0	0
1	1	0	0	73.0137	1	0	0	1	0	0	1	1	0	0	1	0	0	0	0	0	0	0	0	0	0	1	1	1	0	2	0	0	0	0	0	0	0	0	0	22	0	37	35.6	0	0	0	0	0
1	1	0	0	79.6412	1	1	0	1	1	1	1	0	0	0	0	1	0	0	0	1	0	0	1	0	0	0	1	1	0	3	1	0	0	0	0	1	0	0	0	9	0	37.1	32.5	0	1	0	0	0
1	0	0	0	65.0344	0	1	0	0	1	0	1	1	0	1	0	0	0	0	0	0	0	0	1	0	0	0	1	1	1	4	1	1	0	0	0	0	0	0	0	8	0	36.8	35.2	0	0	0	0	0
1	0	0	0	43.3282	1	0	1	0	1	1	1	1	0	0	1	0	0	0	0	1	0	0	1	0	1	1	1	0	1	1	1	1	1	0	0	1	1	0	1	5	0	36.6	35.4	0	0	0	1	0
1	1	0	0	75.818	0	0	0	1	1	1	1	0	0	0	1	1	0	0	0	1	1	0	0	0	0	0	1	0	0	4	1	1	0	0	0	1	1	0	0	34	1	38.7	36.3	0	0	0	0	0
1	1	0	0	73.7637	1	0	0	0	0	0	1	0	0	1	0	1	0	0	0	0	1	0	0	0	0	0	1	1	0	3	0	1	0	0	0	0	0	0	0	7	0	35.4	31	0	1	0	1	1
0	1	0	0	44.6116	1	0	0	1	0	1	0	0	0	0	0	0	0	0	0	0	0	0	0	0	1	0	1	0	0	1	1	1	0	1	0	0	0	0	0	25	0	0	0	0	0	0	0	0
0	1	0	0	58.9405	1	0	0	0	0	0	0	0	0	0	0	0	0	1	0	0	0	0	1	0	0	0	1	1	0	2	1	0	0	0	0	0	0	0	0	65	0	0	0	0	0	0	0	0
1	1	0	0	77.9093	1	0	0	0	0	1	1	0	0	0	0	0	0	0	0	0	0	0	0	0	0	0	0	0	0	2	0	0	0	0	0	0	0	0	0	7	1	39.4	31.9	0	1	0	0	0
1	1	0	1	77.7622	1	0	1	0	1	0	0	0	0	0	1	0	0	0	0	0	0	0	0	0	0	0	0	0	0	4	1	1	1	0	0	1	0	0	1	7	0	37.7	35.2	0	0	0	0	0
1	1	0	1	70.3642	1	0	0	1	1	1	1	0	0	0	1	1	0	0	0	0	1	0	0	0	1	0	1	0	1	1	1	1	0	1	0	0	0	0	0	21	0	37.8	36.2	0	0	0	1	0
0	1	0	0	68.1763	1	0	0	0	1	1	1	1	0	1	1	0	0	0	0	0	0	0	0	0	1	0	1	0	0	1	1	1	1	1	1	1	1	0	0	58	0	0	0	0	0	0	0	0
1	1	0	0	77.7958	0	0	0	0	0	1	1	1	0	1	0	1	0	0	0	0	0	0	0	0	1	0	1	1	0	3	0	0	0	0	0	0	0	0	0	16	0	37.3	36.3	0	0	0	1	0
1	0	0	0	74.8928	0	1	0	1	1	1	0	0	0	1	0	0	0	0	0	0	0	0	0	0	0	0	0	0	0	1	1	1	1	0	1	0	0	0	0	4	0	36.4	0	1	0	0	1	1
1	1	0	0	64.9233	1	0	0	0	0	1	0	0	0	0	1	0	0	1	0	1	1	0	0	0	0	0	1	1	0	2	0	0	0	0	0	0	0	0	0	23	0	35.3	35.3	0	0	0	0	0
1	1	0	0	70.1884	0	0	0	0	0	1	1	1	1	0	1	1	1	0	0	0	0	0	1	0	1	0	1	1	1	1	1	1	0	1	0	0	0	0	0	6	0	37.9	36.5	0	0	0	0	0
1	1	0	0	44.7785	1	1	0	0	0	0	1	1	1	0	0	0	0	0	0	1	1	0	0	0	0	1	1	0	0	4	1	1	0	0	0	0	0	0	0	9	0	37	35.8	0	0	0	0	0
1	0	0	0	63.104	1	0	0	0	1	1	0	0	0	0	1	0	0	0	0	0	0	0	0	0	0	0	0	1	0	4	1	1	1	0	0	1	0	0	0	21	1	38	35.5	1	0	0	1	1
0	1	0	1	52.0208	1	1	1	1	1	1	1	1	1	1	0	0	0	0	0	0	0	0	0	0	1	0	1	0	0	1	1	1	0	1	0	1	1	0	0	25	0	35	0	0	0	0	0	0
1	1	0	0	49.2084	0	0	0	0	0	1	1	0	0	0	1	0	0	0	0	0	0	0	0	0	0	0	0	0	1	2	1	0	0	0	0	0	0	0	0	18	0	37.8	36.9	0	0	0	1	1
1	1	0	0	88.6434	0	0	0	1	1	1	1	0	0	0	0	0	0	0	0	0	0	0	0	0	0	0	0	1	0	1	1	1	0	0	0	1	1	0	0	19	0	37.1	35.6	0	0	0	0	0
0	1	0	0	72.831	0	1	1	1	1	1	1	0	0	0	1	0	0	0	0	0	0	0	1	0	0	0	1	0	0	4	1	1	0	1	1	0	0	0	0	106	0	0	0	0	0	0	0	0
0	1	0	0	96.199	1	0	0	1	1	1	0	0	0	1	0	1	0	0	0	0	0	0	0	0	1	0	1	0	0	1	1	1	0	1	0	1	0	0	0	38	0	0	0	0	0	0	0	0
1	1	0	1	21.3856	1	1	0	0	0	0	0	0	0	0	0	0	0	0	0	1	0	0	0	0	0	1	1	1	0	2	0	0	0	0	0	0	0	0	0	65	0	35.9	33.5	1	1	0	0	0
1	1	0	0	78.2231	1	0	0	0	0	1	0	0	0	0	0	1	0	0	0	0	0	0	0	0	0	0	0	1	0	2	0	0	0	0	0	0	0	0	0	26	0	36.4	35.6	0	0	0	0	0
1	1	0	0	50.1167	1	0	0	0	0	0	0	0	0	0	0	1	0	0	0	0	0	0	1	0	0	0	1	1	1	2	0	0	0	0	0	0	0	0	0	10	0	37.1	35.5	0	0	0	1	0
0	1	0	0	49.7995	1	0	0	0	1	1	0	0	0	0	0	0	0	0	0	0	0	0	0	0	0	0	0	1	1	2	1	1	0	0	0	0	0	0	0	60	0	0	0	0	0	0	0	0
1	1	0	0	72.1607	1	0	0	0	0	1	0	0	1	0	0	0	0	0	0	1	1	0	0	0	0	0	1	0	0	1	1	1	0	0	0	0	0	0	0	4	0	36.3	35.6	0	0	0	0	0
1	1	0	0	67.0584	1	0	0	0	0	1	0	0	0	0	0	1	0	0	0	1	1	0	1	0	0	0	1	1	1	2	0	1	0	0	0	0	0	0	0	24	1	39.1	35.6	0	0	0	0	0
0	1	0	0	63.0101	1	0	0	0	0	1	0	0	0	0	0	0	0	0	0	0	0	0	1	0	1	0	1	0	0	1	1	1	0	0	0	0	0	0	0	38	0	0	0	0	0	0	0	0
0	1	0	0	57.4399	1	0	0	0	1	0	0	0	0	0	0	0	0	1	0	0	0	0	0	0	0	0	0	1	0	2	0	0	0	0	0	0	0	0	0	151	0	0	0	0	0	0	0	0
0	1	0	0	67.0752	1	0	0	0	1	1	0	0	0	1	1	0	0	0	0	0	0	0	0	0	0	0	0	1	0	1	1	1	0	1	0	1	0	0	0	55	0	0	0	0	0	0	0	0
1	1	0	1	47.0854	1	1	0	0	0	1	0	0	0	0	0	0	0	0	0	0	0	0	0	0	0	0	0	1	0	1	1	1	0	0	0	1	0	0	0	3	0	36.6	33.5	0	0	0	0	0
1	1	0	0	50.8091	1	0	0	0	0	0	0	0	1	0	1	1	1	0	0	0	0	0	0	0	0	0	0	1	0	2	1	0	0	0	0	0	0	0	0	32	0	37.9	35	0	0	0	1	0
1	1	0	0	79.3431	1	0	0	0	0	1	1	0	0	0	1	0	0	0	0	0	0	0	0	0	0	0	0	1	1	2	0	0	0	0	0	0	0	0	0	20	1	39.2	34.1	0	0	0	0	0
1	1	0	0	60.7884	1	1	0	0	1	0	1	1	0	0	0	0	1	0	0	0	0	0	0	0	0	0	0	1	1	2	0	0	1	0	0	0	0	0	0	9	1	40.1	35.6	0	0	0	0	0
1	1	0	1	44.3626	1	0	1	0	1	1	0	0	0	0	0	0	0	1	0	0	0	0	0	0	0	1	1	0	1	2	1	0	1	0	0	0	0	0	0	37	0	37.3	35.3	1	0	0	0	0
1	1	0	0	58.2256	1	0	0	0	0	1	0	0	0	0	0	0	0	1	0	0	1	0	0	0	1	0	1	1	0	2	0	0	0	0	0	0	0	0	0	4	0	37.1	35.6	0	0	0	0	0
0	1	0	0	64.5328	1	0	0	0	0	1	1	0	0	0	0	0	0	0	0	0	0	0	0	0	1	0	1	0	0	2	0	0	0	0	0	0	0	0	0	63	0	0	0	0	0	0	0	0
0	1	0	0	70.0283	0	0	0	0	0	1	0	0	1	0	1	0	0	0	0	0	0	0	0	0	0	0	0	1	0	2	0	0	0	0	0	0	0	0	0	33	0	0	0	0	0	0	0	0
1	1	0	0	63.5321	1	0	0	0	0	0	0	0	1	0	0	1	0	1	0	0	0	0	0	0	0	0	0	1	1	2	1	0	1	0	0	0	0	0	0	8	0	37.1	35.6	0	0	0	0	0
0	1	0	0	86.9832	1	0	1	0	0	1	1	1	0	0	1	1	0	0	0	0	0	0	0	0	0	0	0	0	0	4	1	1	0	0	0	0	1	0	0	96	0	0	0	0	0	0	0	0
0	1	0	0	42.4205	0	0	0	0	0	1	0	0	0	0	0	0	0	1	0	0	0	0	0	0	0	0	0	1	0	2	0	0	0	0	0	0	0	0	0	53	0	0	0	0	0	0	0	0
0	1	0	0	74.5178	1	0	0	0	0	0	0	0	0	0	0	0	0	0	0	0	0	0	0	0	0	0	0	0	0	2	0	0	0	0	0	0	0	0	0	26	0	0	0	0	0	0	0	0
1	1	0	0	58.7913	0	0	0	0	1	1	0	0	0	0	0	0	0	1	0	0	0	0	0	0	0	0	0	0	0	1	1	1	0	1	0	1	0	0	0	14	0	35.3	35.3	0	0	0	0	0
0	1	0	0	57.2351	1	0	0	0	0	1	0	0	0	0	0	0	0	1	0	0	0	0	0	0	0	0	0	1	1	2	0	0	0	0	0	0	0	0	0	73	0	0	0	0	0	0	0	0
1	1	0	0	48.9056	1	0	0	0	0	1	0	0	0	0	0	0	0	1	0	0	0	0	0	0	0	0	0	1	1	2	1	1	0	0	0	0	0	0	0	18	0	37.2	36.4	0	0	0	0	0
1	1	0	1	62.119	1	0	0	0	0	1	0	0	0	0	0	0	0	0	0	1	0	0	0	0	1	1	1	1	1	1	1	1	0	1	0	0	0	0	0	32	0	37.3	36.6	0	0	0	0	0
0	1	0	0	80.0899	1	1	1	0	0	1	0	0	0	0	0	0	0	0	0	0	0	0	0	0	1	0	1	1	1	1	1	1	0	1	0	0	0	0	0	28	0	0	0	0	0	0	0	0
1	1	0	0	59.8147	1	0	0	0	1	1	1	0	1	1	0	0	0	1	0	0	0	0	0	0	0	0	0	1	1	1	1	1	0	0	0	1	1	0	0	7	0	37.1	35.6	0	0	0	0	0
0	1	0	0	60.1551	1	0	0	0	0	1	0	0	1	0	0	0	0	1	0	0	0	0	0	0	0	0	0	0	0	2	0	0	0	0	0	0	0	0	0	77	0	0	0	0	0	0	0	0
0	1	0	0	84.8385	0	0	0	0	0	1	0	0	0	0	0	1	0	0	0	0	0	0	0	0	0	0	0	1	1	1	1	1	0	1	0	0	0	0	0	39	0	0	0	0	0	0	0	0
0	1	0	0	33.1105	0	1	0	0	1	1	0	0	1	0	0	0	0	0	0	0	0	0	0	0	0	0	0	0	0	2	1	1	0	0	0	0	0	0	0	39	0	0	0	0	0	0	0	0
0	1	0	0	41.3653	1	0	1	0	0	0	0	0	0	0	1	1	0	0	0	0	0	0	0	1	1	0	1	0	0	1	1	1	0	0	0	0	0	1	0	8	0	0	0	0	0	0	0	0
1	1	0	0	67.8327	1	0	0	0	1	1	0	0	0	0	1	0	0	1	0	0	0	0	0	0	0	0	0	1	1	2	0	0	0	0	0	0	0	0	0	48	0	37.9	35.6	0	0	0	0	0
0	1	0	0	71.07	1	0	0	0	0	1	1	0	0	0	0	0	0	0	0	0	0	0	1	0	0	0	1	1	0	1	1	1	0	0	1	0	0	0	0	40	0	0	0	0	0	0	0	0
1	1	0	0	90.4974	1	0	0	1	0	1	0	0	0	0	1	1	0	1	0	0	0	0	0	0	1	0	1	1	0	2	0	0	0	0	0	0	0	0	0	41	1	39.2	35.6	0	0	0	0	0
0	1	0	0	76.6334	0	1	1	1	0	0	0	0	0	0	0	0	0	0	0	0	0	0	0	1	0	0	1	0	1	2	1	0	0	0	0	0	0	0	0	65	0	0	0	0	0	0	0	0
0	1	0	0	60.8128	1	1	1	0	1	1	1	0	0	0	1	0	0	0	0	0	0	0	1	0	1	0	1	1	0	1	1	1	1	1	0	0	1	0	0	45	0	0	0	0	0	0	0	0
0	1	0	0	85.9849	0	1	1	0	0	1	0	0	0	0	0	1	0	0	0	0	0	0	1	0	1	0	1	1	0	1	1	1	0	1	0	0	0	0	0	49	0	0	0	0	0	0	0	0
1	1	0	0	25.1513	0	0	0	0	0	1	0	0	0	0	0	1	0	1	0	0	1	0	1	0	1	0	1	0	0	1	1	1	1	1	0	0	0	0	0	4	1	38.6	36.5	0	0	0	0	0
1	1	0	0	64.9906	0	0	0	0	1	1	0	0	0	0	1	0	0	0	0	0	0	0	1	0	0	0	1	1	0	2	1	0	0	0	0	0	0	0	0	3	0	37.5	35.9	0	0	0	0	0
1	1	0	0	53.4414	1	0	0	0	1	1	0	0	0	0	1	1	0	1	0	0	0	0	0	0	1	0	1	0	0	2	1	0	0	1	0	1	0	0	0	8	1	39	36.6	0	0	0	0	0
1	1	0	0	82.6846	1	1	1	1	0	1	0	0	0	0	1	0	0	0	0	0	0	0	0	0	0	0	0	0	0	2	1	0	0	0	0	0	0	0	0	10	0	37.9	35.6	0	0	0	0	0
1	1	0	0	45.9279	1	0	0	0	0	1	0	0	1	1	0	0	0	0	0	1	1	0	1	0	1	0	1	1	1	3	1	1	0	0	0	0	0	0	0	3	0	37.8	36.4	0	0	0	0	0
1	1	0	0	73.4142	0	0	0	0	1	1	1	0	0	1	1	0	0	0	0	0	0	0	0	0	1	0	1	0	1	1	1	1	0	1	0	1	0	0	0	15	0	35.2	35.2	0	0	0	0	0
0	1	0	0	83.4353	1	0	1	1	1	1	0	0	0	0	0	0	0	0	0	0	0	0	1	0	0	0	1	1	0	1	1	1	0	0	0	0	0	0	0	50	0	0	0	0	0	0	0	0
1	1	0	0	87.3919	0	0	0	0	0	1	0	0	0	0	0	0	0	0	0	0	0	0	0	0	0	0	0	1	0	1	1	1	0	1	0	0	0	0	0	14	0	37.2	36.3	0	0	0	1	0
1	1	0	0	56.2574	1	0	0	0	1	1	0	0	0	1	0	0	0	0	0	1	0	0	1	0	0	0	1	1	0	1	1	1	0	0	0	0	0	0	0	6	0	37.2	36.1	0	0	0	0	0
0	1	0	1	36.2253	1	0	0	0	1	1	1	0	0	1	1	0	0	0	0	0	0	0	0	0	1	0	1	1	0	1	1	1	0	1	1	1	0	0	0	40	1	41.9	0	0	0	0	0	0
1	0	0	0	51.6953	1	0	1	0	1	1	0	0	0	0	1	1	0	0	0	0	0	0	0	1	1	0	1	0	0	1	1	1	1	1	1	0	0	0	0	5	1	38.1	0	1	0	0	1	0
0	1	0	0	72.1801	1	0	1	0	1	1	1	0	1	1	1	0	0	0	0	0	0	1	0	0	1	0	1	1	0	1	1	1	0	1	0	1	0	0	0	19	0	0	0	0	0	0	0	0
0	1	0	0	53.3257	0	0	0	0	0	1	0	0	0	0	0	0	0	0	0	0	0	0	1	0	0	0	1	1	0	2	0	1	0	0	0	0	0	0	0	41	0	0	0	0	0	0	0	0
0	1	0	0	93.462	0	1	0	1	1	1	1	0	1	1	1	0	0	0	0	0	0	0	0	0	1	0	1	1	0	1	1	1	0	1	0	1	1	0	0	15	0	0	0	0	0	0	0	0
0	1	1	0	72.9408	1	1	1	0	1	1	1	0	0	1	0	1	0	0	0	0	0	0	0	0	1	0	1	0	0	1	1	1	0	1	0	1	0	0	0	27	0	0	0	0	0	0	0	0
1	1	0	0	54.7139	1	0	0	0	0	0	0	0	0	0	0	0	0	0	0	1	0	0	0	0	1	1	1	1	0	2	0	0	0	0	0	0	0	0	0	82	0	37.3	36.2	0	0	0	0	0
1	1	0	0	74.6444	1	1	0	1	0	1	0	0	0	0	1	1	0	0	0	0	1	0	0	0	1	0	1	1	0	1	1	1	0	1	0	0	0	0	0	5	0	37.3	36.2	0	0	0	1	0
0	1	0	0	34.1103	1	0	0	0	0	1	0	0	0	0	0	0	0	0	0	0	0	0	0	0	0	0	0	1	1	2	0	0	0	0	0	0	0	0	0	70	0	0	0	0	0	0	0	0
0	1	0	1	68.5211	1	0	1	0	1	1	1	1	1	0	0	0	0	0	0	1	1	0	0	0	0	0	1	0	0	4	1	1	0	0	1	1	0	0	0	59	0	36.5	0	0	0	0	0	0
1	0	0	0	73.4047	1	1	1	0	1	1	0	0	1	0	0	0	0	0	0	1	0	0	1	0	0	0	1	1	0	1	1	1	0	0	0	1	0	0	0	20	1	38.2	37.2	1	0	0	1	1
0	1	0	0	89.0571	0	0	1	0	1	1	0	0	0	1	0	0	0	0	0	0	0	0	0	0	1	0	1	1	0	1	1	1	0	0	0	1	0	0	0	24	0	0	0	0	0	0	0	0
0	1	0	0	49.0644	0	0	0	0	1	1	1	0	1	0	0	1	0	0	0	0	0	0	0	0	1	0	1	1	0	1	1	1	0	1	0	1	0	0	0	30	0	0	0	0	0	0	0	0
1	1	0	0	73.7955	0	0	0	0	1	1	1	0	0	1	1	0	0	1	0	1	1	0	0	0	1	0	1	1	0	1	1	1	0	1	0	1	0	0	0	32	1	39.6	35.6	0	0	0	0	0
0	1	0	0	59.2125	1	0	0	0	1	1	1	0	0	0	0	0	0	0	0	0	0	0	0	0	1	0	1	0	1	1	1	1	1	1	0	1	0	0	0	14	0	0	0	0	0	0	0	0
0	1	0	1	67.613	0	0	0	0	0	1	0	0	0	0	0	0	0	0	0	1	1	1	0	0	0	0	1	0	0	1	1	1	0	1	0	0	0	0	0	22	0	0	0	0	0	0	0	0
0	1	0	0	27.6881	1	0	0	0	1	1	1	0	1	1	0	0	0	1	0	0	0	0	0	0	1	0	1	1	0	1	1	1	0	1	0	1	0	0	0	33	0	0	0	0	0	0	0	0
1	0	0	1	44.6672	1	1	0	0	1	1	0	0	1	0	0	0	0	0	0	1	0	0	0	0	0	1	1	0	1	1	1	1	0	1	0	0	0	0	0	10	0	37.6	35.7	0	0	0	1	1
0	1	0	0	68.3189	1	0	1	0	1	1	0	0	1	0	1	0	0	0	0	0	0	0	0	0	0	0	0	0	0	1	1	1	1	1	1	1	0	0	1	30	0	0	0	0	0	0	0	0
0	1	1	0	53.0394	1	0	0	0	1	1	1	0	1	1	0	0	0	0	0	0	0	0	0	0	0	0	0	0	0	1	1	1	1	0	0	1	0	0	0	30	0	0	0	0	0	0	0	0
1	1	0	0	70.794	1	0	0	0	0	0	0	0	0	0	1	0	0	0	0	1	0	0	1	1	0	0	1	0	0	2	1	0	0	0	0	0	0	0	0	63	1	38.4	35.7	0	0	0	0	0
1	1	0	0	58.5829	0	0	1	0	1	1	1	0	1	0	0	0	0	0	0	0	0	0	0	0	1	0	1	0	1	1	1	1	0	1	1	1	1	1	0	7	0	37.3	35.6	0	0	0	0	0
1	1	0	0	56.4203	1	0	0	0	1	1	0	0	0	1	0	1	0	0	0	0	0	0	0	0	1	0	1	0	1	1	1	1	0	1	0	1	0	0	0	12	0	37.1	35.6	0	0	0	0	0
1	1	0	0	76.6311	1	0	0	0	1	1	1	0	1	0	1	0	0	0	0	1	1	0	1	0	1	0	1	0	0	1	1	1	0	1	0	1	0	0	0	6	0	37.2	37.2	0	0	0	0	0
1	1	0	0	62.5343	1	1	0	0	1	1	1	0	1	0	1	0	0	0	0	0	1	0	0	0	1	0	1	0	0	1	1	1	1	0	0	1	0	0	0	3	0	36.3	35.6	0	0	0	0	0
1	1	0	0	57.8176	1	0	1	0	1	1	0	0	0	0	1	0	0	1	0	0	1	0	0	0	1	0	1	1	0	1	1	1	0	1	0	1	0	0	0	6	0	36.8	35.6	0	0	0	0	0
1	0	0	0	76.742	0	0	1	1	1	1	1	1	0	1	0	0	0	0	0	0	0	0	0	0	0	0	0	1	0	4	1	1	0	0	1	1	0	1	0	11	0	35.2	0	1	0	0	0	0
1	1	0	0	66.9443	0	0	0	0	1	1	0	0	0	0	1	1	0	1	0	0	0	0	0	1	1	0	1	0	1	1	1	1	1	1	0	1	0	0	0	13	0	36.9	36.2	0	0	0	0	0
1	1	0	0	93.0997	0	1	0	1	0	1	0	0	0	0	0	1	0	0	0	0	0	0	0	0	1	0	1	0	0	2	0	1	0	0	0	0	0	0	0	5	0	37.1	36.1	0	0	0	1	0
1	1	0	0	67.1858	1	0	0	1	0	0	1	1	1	1	0	0	0	1	0	1	1	0	0	0	0	1	1	0	0	3	0	0	0	0	0	0	0	0	0	33	0	37.6	34.8	0	0	0	0	0
0	1	0	0	70.7484	0	0	0	0	1	1	0	0	0	1	1	0	0	0	0	0	0	0	0	0	0	0	0	1	0	1	1	1	0	1	0	1	0	0	0	35	0	0	0	0	0	0	0	0
0	1	0	0	38.0056	0	0	0	0	1	1	1	0	1	0	0	1	0	0	0	0	0	0	0	0	1	0	1	0	0	4	1	0	0	1	0	1	0	0	0	35	0	0	0	0	0	0	0	0
1	1	0	0	74.2986	0	1	1	1	0	1	0	0	1	0	1	0	0	0	0	0	0	0	0	0	1	0	1	0	0	1	1	1	0	1	0	0	0	0	0	85	0	35.8	35.6	0	0	0	0	0
1	1	0	1	63.912	0	0	0	0	1	1	0	0	0	0	0	0	0	0	0	0	0	0	0	0	0	0	0	1	0	2	1	1	0	0	0	1	0	0	0	49	0	35.1	0	0	0	0	0	0
0	1	0	0	68.2353	0	1	0	0	1	1	1	1	0	1	1	0	0	0	0	0	0	0	0	0	1	0	1	1	1	2	1	0	1	0	1	1	1	0	0	52	0	0	0	0	0	0	0	0
1	0	0	1	59.7821	1	0	0	1	1	1	1	0	1	1	0	0	0	0	0	1	1	0	0	0	1	0	1	0	0	1	1	1	0	1	0	1	1	0	0	4	0	37	36.4	0	0	0	0	0
1	0	0	0	56.0139	1	1	0	1	1	1	0	0	0	0	0	0	0	0	0	1	1	0	0	0	0	0	1	1	0	2	1	1	1	0	0	0	0	0	0	4	1	38.6	36.8	0	0	0	1	1
1	1	0	0	88.517	1	0	0	1	1	1	0	0	0	1	0	1	0	0	0	0	0	0	0	0	1	0	1	1	1	1	1	1	0	1	0	1	0	0	0	4	0	37.1	35.6	0	0	0	0	0
1	1	0	0	80.9789	0	0	0	1	0	1	0	0	0	0	1	0	0	0	0	0	0	0	0	0	0	0	0	0	1	2	0	0	0	0	0	0	0	0	0	5	0	37.1	35.6	0	0	0	1	0
1	1	0	0	89.2805	0	1	1	0	1	1	0	0	0	0	1	1	0	0	0	1	1	0	0	0	1	0	1	0	0	4	1	1	0	1	0	1	0	1	0	22	0	36.7	35	0	0	0	0	0
1	0	0	0	64.3356	0	1	0	1	1	1	1	0	1	0	1	0	0	0	0	1	0	0	0	0	1	0	1	0	0	1	1	1	0	1	1	1	0	0	0	4	1	38.5	35.8	0	0	0	0	0
1	1	0	0	81.9243	0	0	0	0	0	1	0	0	0	1	0	0	0	0	0	0	0	0	0	0	0	0	0	1	0	2	0	0	0	0	1	0	0	0	0	18	0	36.6	35.6	0	0	0	0	0
0	1	0	1	58.4004	1	0	1	0	1	1	0	0	0	1	1	0	0	0	0	0	0	0	0	0	1	0	1	1	0	1	1	1	1	1	0	1	1	1	0	58	0	37.2	0	0	0	0	0	0
1	1	0	0	74.8372	0	0	1	0	0	1	1	1	0	0	1	1	0	0	0	0	0	0	0	0	0	0	0	1	0	2	1	1	0	0	0	0	1	0	0	57	0	37.1	35.6	0	0	0	0	0
1	1	0	0	65.713	1	0	0	0	1	1	0	0	0	1	0	0	0	0	0	0	0	0	0	0	1	0	1	0	0	1	1	1	0	1	0	1	0	0	0	3	0	37.1	35.6	0	0	0	0	0
1	1	0	0	77.7671	0	0	0	0	0	1	1	0	0	0	1	0	0	0	0	0	0	0	0	0	1	0	1	0	1	1	1	1	0	1	0	0	0	0	0	63	0	37.1	35.6	0	0	0	0	0
0	1	0	0	48.4901	1	0	0	1	1	1	1	0	1	0	0	0	0	1	0	0	0	0	0	0	1	0	1	1	0	1	1	1	1	1	0	1	0	0	0	38	0	0	0	0	0	0	0	0
1	1	0	0	60.3076	1	0	0	0	0	1	0	0	0	0	0	0	0	0	0	0	0	0	0	0	0	0	0	0	0	2	0	1	0	0	0	0	0	0	0	53	0	36.5	35.6	0	0	0	0	0
1	1	0	1	82.4907	1	1	0	1	1	1	1	0	0	0	1	1	0	0	0	1	1	0	0	0	0	1	1	1	0	1	1	1	0	1	0	1	0	0	0	23	0	37.1	35.5	0	0	0	0	0
1	1	0	0	80.1488	0	1	0	0	0	1	0	0	0	0	0	0	0	0	0	0	0	0	0	0	0	0	0	0	1	2	0	0	0	0	0	0	0	0	0	24	0	37.1	35.6	0	0	0	0	0
1	1	0	0	72.4059	1	0	1	0	1	1	1	1	0	0	0	0	0	0	0	0	0	0	0	0	0	0	0	1	1	4	1	1	1	0	0	1	0	0	0	26	1	38.7	35.5	0	0	0	0	0
1	1	0	0	78.2815	1	1	0	0	1	1	1	0	1	1	0	0	0	0	0	0	0	0	0	0	1	0	1	1	0	1	1	1	0	0	1	1	1	0	1	13	0	37.1	35.6	0	0	0	0	0
0	1	0	0	86.9907	1	1	0	0	0	1	0	0	0	0	1	0	0	0	0	0	0	0	0	1	0	0	1	0	0	2	1	0	1	0	0	0	0	0	0	79	0	0	0	0	0	0	0	0
1	1	0	0	84.8429	0	0	0	1	1	1	1	0	0	1	0	1	0	0	0	1	0	0	0	0	1	0	1	1	1	1	1	1	0	1	1	1	1	0	1	9	0	35.2	35.2	0	0	0	0	0
1	1	0	0	79.4232	1	0	0	0	0	0	0	0	0	0	1	0	0	0	0	0	0	0	0	0	0	0	0	1	0	2	1	0	0	0	0	0	0	0	0	34	0	37.1	35.6	0	0	0	0	0
0	1	0	0	68.1532	1	0	0	0	1	1	1	0	0	0	0	0	0	0	0	0	0	0	0	0	0	0	0	1	0	1	1	1	0	1	0	1	0	0	0	35	0	0	0	0	0	0	0	0
1	1	0	0	68.8372	0	1	0	1	1	0	0	0	1	0	1	0	0	0	0	0	0	0	1	0	0	0	1	1	0	2	0	0	0	0	1	1	0	0	0	30	0	37.1	35.6	0	0	0	0	0
1	0	0	0	63.6964	0	0	0	0	1	0	0	0	0	0	1	0	0	0	0	1	0	0	0	0	0	0	1	1	0	2	0	1	0	0	0	1	0	0	0	10	1	38.4	34	0	0	0	1	0
1	1	0	1	34.5687	0	0	0	0	1	1	0	0	0	0	0	1	0	0	0	0	0	0	0	0	1	0	1	1	0	1	1	1	0	1	0	1	0	0	0	47	0	37.1	35.7	0	0	0	0	0
1	1	0	0	43.5427	1	0	0	0	1	1	1	0	0	0	0	0	1	0	0	0	0	0	0	0	1	0	1	1	1	2	0	1	0	0	0	1	0	0	0	9	1	38.8	36	0	0	0	0	0
1	1	0	0	87.4977	1	1	1	0	0	1	1	1	0	0	0	0	0	0	0	0	0	0	0	0	1	0	1	0	0	1	1	1	1	1	0	0	0	0	0	13	0	36.9	35.6	0	0	0	0	0
1	1	0	0	83.9452	1	0	0	1	1	1	0	0	0	1	0	0	0	0	0	1	1	0	0	0	0	0	1	1	0	2	1	0	0	0	1	1	0	0	0	4	0	37.3	35.4	0	0	0	1	1
0	1	0	0	75.5543	0	1	0	1	1	1	1	1	1	0	1	0	0	0	0	0	0	0	0	0	1	0	1	1	0	1	1	1	0	1	0	1	0	0	0	37	0	0	0	0	0	0	0	0
1	1	0	0	70.1535	1	1	1	1	1	1	1	1	1	0	1	1	0	0	0	0	0	0	0	0	1	0	1	0	0	1	1	1	0	1	0	1	0	0	0	18	0	37.1	35.6	0	0	0	0	0
0	1	0	0	72.2591	1	0	0	1	0	1	0	0	0	0	1	0	0	0	0	0	0	0	0	0	1	0	1	0	0	2	1	1	0	0	1	1	0	0	0	22	0	0	0	0	0	0	0	0
1	1	0	0	51.5424	0	0	0	0	0	0	0	0	0	0	0	0	0	1	0	1	0	0	0	0	0	0	1	1	1	4	0	1	0	0	0	0	0	0	0	17	0	33.7	33.7	0	0	0	0	0
1	1	0	1	47.3645	1	0	1	0	0	1	0	0	0	0	0	0	0	0	0	0	0	0	1	0	0	0	1	1	0	4	1	1	0	0	0	0	0	0	0	41	1	38.2	36.1	0	0	0	0	0
1	1	0	0	84.664	0	1	0	1	0	1	1	1	1	0	0	1	0	0	0	0	0	0	1	0	1	0	1	0	0	1	1	1	0	1	0	0	0	0	0	116	0	37.1	35.6	1	0	0	0	0
0	1	0	0	49.0098	1	1	0	0	0	1	1	0	0	1	0	1	0	0	0	0	0	0	0	0	0	0	0	1	0	2	1	0	1	0	0	0	0	0	0	28	0	0	0	0	0	0	0	0
1	1	0	0	79.642	1	0	1	0	0	1	0	0	0	0	1	0	0	0	0	0	0	0	0	0	0	0	0	1	0	3	0	1	0	0	0	0	0	0	0	17	1	38.3	36.6	1	0	0	0	0
1	1	0	0	71.8583	1	0	0	0	0	1	0	0	0	0	0	0	0	0	0	0	1	0	1	0	0	0	1	1	0	2	0	1	0	0	0	1	0	0	0	8	0	37.2	35.4	0	0	0	1	1
0	1	0	0	47.8718	0	0	0	0	1	1	0	0	0	0	0	0	0	0	0	0	0	0	0	0	1	0	1	1	1	1	1	1	0	1	0	0	0	0	0	49	0	0	0	0	0	0	0	0
0	1	0	0	62.6318	1	0	0	0	0	1	1	0	0	1	0	1	0	0	0	0	0	0	0	0	0	0	0	1	0	1	1	1	0	0	0	0	0	0	0	52	0	0	0	0	0	0	0	0
1	1	0	1	34.965	0	0	0	0	1	1	0	0	0	0	0	0	0	0	1	0	0	0	0	0	0	1	1	1	0	2	1	0	0	0	0	0	0	0	0	27	1	38.1	35.6	0	0	0	1	1
1	0	0	0	56.781	0	0	0	0	0	1	0	0	0	0	0	0	0	1	0	0	0	0	0	0	1	0	1	1	0	2	0	0	0	0	0	0	0	0	0	11	0	37.1	36.3	0	0	0	1	0
1	1	0	0	65.0795	1	1	0	0	0	0	0	0	0	0	1	0	0	0	0	0	0	0	0	0	0	0	0	1	0	2	1	1	1	0	0	0	0	0	0	29	0	37.5	34.5	0	0	0	0	0
1	1	0	0	65.9982	1	1	0	0	0	1	0	0	0	0	1	0	0	0	0	0	0	0	0	0	0	0	0	1	1	2	1	1	1	0	0	0	0	0	0	19	0	37.4	36.4	0	0	0	1	1
1	1	0	0	47.2914	1	0	0	0	0	0	0	0	0	0	0	0	0	0	0	0	0	0	0	0	0	0	0	1	0	3	0	0	0	0	0	0	0	0	0	3	0	37.1	35.6	0	0	0	0	0
1	1	0	1	19.0456	1	0	0	0	0	1	0	0	0	0	0	0	1	0	0	1	0	0	0	0	0	1	1	0	0	1	1	1	0	0	0	0	0	0	0	53	0	37.7	35.4	0	0	0	0	0
0	1	0	0	86.7421	0	0	1	0	1	1	0	0	0	0	1	0	0	0	0	0	0	0	0	0	1	0	1	0	0	1	1	1	1	1	0	1	0	0	0	30	0	0	0	0	0	0	0	0
0	1	0	0	53.2918	0	0	0	0	0	1	0	0	0	0	0	0	0	1	0	0	0	0	0	0	0	0	0	1	0	2	0	1	0	1	0	0	0	0	0	16	0	0	0	0	0	0	0	0
1	1	0	0	73.8436	1	0	1	1	0	0	0	0	0	0	0	0	0	0	0	1	0	0	0	0	0	0	1	0	0	2	0	0	0	0	0	0	0	0	0	10	1	38.6	35.4	0	0	0	1	0
0	1	0	0	94.8665	1	0	1	1	0	1	0	0	0	0	0	0	0	0	0	0	0	0	0	0	0	0	0	1	0	2	0	0	0	0	0	0	0	0	0	60	0	0	0	0	0	0	0	0
1	1	0	0	72.1923	0	0	0	0	0	1	0	0	0	0	0	1	0	1	0	0	0	0	1	0	0	0	1	1	0	2	1	1	0	1	0	0	0	0	0	11	1	39.3	36.4	0	0	0	0	0
1	1	0	0	84.3085	0	1	1	0	0	1	1	0	0	0	0	1	0	0	0	0	0	0	0	0	1	0	1	0	0	1	1	1	0	1	0	0	0	0	0	8	0	37.1	35.6	0	0	0	1	0
0	1	0	0	82.1901	0	1	0	0	1	1	1	1	0	0	1	1	0	0	0	0	0	0	0	0	1	0	1	1	1	2	1	0	0	0	0	1	0	0	0	30	0	0	0	0	0	0	0	0
1	1	0	1	56.3571	1	1	0	0	1	1	1	0	0	0	1	0	0	0	0	0	1	0	0	1	0	0	1	0	0	1	1	1	0	0	0	0	1	0	0	34	0	37.4	36.9	0	0	0	1	1
0	1	0	0	82.2082	1	0	0	0	0	1	1	1	0	0	0	0	0	0	0	0	0	0	0	0	0	0	0	0	1	2	0	0	0	0	0	0	0	0	0	56	0	0	0	0	0	0	0	0
0	1	0	1	19.1337	0	1	0	0	1	1	1	0	1	0	1	0	0	0	0	0	0	0	0	0	0	0	0	0	1	1	1	1	0	0	0	1	1	0	0	24	0	37.8	0	0	0	0	0	0
0	1	0	0	82.8522	1	0	0	0	0	0	1	0	1	0	0	0	0	1	0	0	0	0	0	0	0	0	0	1	0	2	0	0	0	0	0	0	0	0	0	45	0	0	0	0	0	0	0	0
1	1	0	1	62.2844	0	1	1	1	0	1	1	0	0	0	1	0	0	0	0	0	1	0	0	0	0	0	1	0	0	1	1	1	1	0	0	0	0	0	0	5	0	36.9	0	0	0	0	1	0
1	1	0	1	47.8885	0	0	0	0	0	1	0	0	0	0	0	0	0	1	0	0	1	0	1	1	1	0	1	1	1	1	1	1	0	0	0	0	0	1	0	47	0	37.4	35.3	0	0	0	1	0
1	1	0	0	85.5194	1	0	0	0	0	1	1	0	1	0	0	1	0	0	0	0	0	0	0	0	1	0	1	1	1	2	0	0	0	0	0	0	0	0	0	20	0	37.1	35.6	0	0	0	0	0
0	1	0	0	63.8743	1	0	0	0	0	0	0	0	1	0	0	1	1	0	0	0	0	0	0	0	0	0	0	1	0	2	0	0	0	0	0	0	0	0	0	33	0	0	0	0	0	0	0	0
1	0	0	0	100.949	1	1	0	1	0	1	0	0	0	0	0	1	0	0	0	0	0	0	0	0	0	0	0	0	0	2	0	1	0	1	0	0	0	0	0	7	0	37.4	26.2	0	0	0	0	0
1	1	0	0	80.8824	0	1	0	1	1	0	1	1	0	0	1	0	0	0	0	0	0	0	0	0	1	0	1	1	0	2	0	1	0	0	0	0	0	0	0	9	0	37.1	35.6	0	0	0	0	0
0	1	0	0	69.3397	0	0	0	0	1	1	1	1	0	0	0	0	0	0	0	0	0	0	0	0	1	0	1	1	1	1	1	1	0	1	0	1	0	0	0	34	0	0	0	0	0	0	0	0
1	1	0	0	81.6879	0	1	0	1	0	1	1	0	1	0	0	1	0	0	0	1	0	0	1	0	1	0	1	0	0	1	1	1	0	1	0	0	0	0	0	7	0	37.1	35.6	0	0	0	0	0
0	1	0	0	86.8164	1	0	0	1	1	1	0	0	0	1	1	0	0	0	0	0	0	0	0	1	1	0	1	0	0	2	1	1	0	0	1	1	0	0	0	6	0	0	0	0	0	0	0	0
0	1	0	1	65.9864	1	0	1	0	1	1	0	0	1	1	0	0	0	1	0	0	0	0	0	0	0	0	0	0	0	1	1	1	0	1	0	1	0	0	0	53	0	36.3	0	1	0	0	0	0
1	1	0	0	50.6346	0	0	0	0	1	1	1	0	1	0	0	0	0	0	0	0	0	0	0	0	1	0	1	1	0	1	1	1	0	1	0	1	0	0	0	6	0	37.1	35.6	0	0	0	0	0
0	1	0	0	60.5833	1	0	0	0	0	1	0	0	0	0	1	1	0	0	0	0	0	0	0	0	1	0	1	1	0	1	1	1	0	1	0	0	0	1	0	34	0	0	0	0	0	0	0	0
1	0	0	0	35.1763	0	0	0	0	1	1	0	0	0	0	0	0	0	0	1	0	0	0	1	0	0	1	1	1	0	2	1	0	0	0	0	0	0	0	0	13	1	38	35	0	0	0	1	1
1	1	0	0	56.7319	1	1	0	0	0	1	1	0	0	0	1	0	0	0	0	0	0	0	0	0	0	0	0	1	1	3	1	1	1	0	0	0	0	0	0	3	0	37.3	35.6	1	0	0	1	1
1	1	0	0	60.7073	0	0	0	1	0	1	0	0	0	0	1	0	0	1	0	0	0	0	1	0	0	0	1	1	0	2	1	0	1	0	0	0	0	0	0	14	1	38.8	36.3	0	0	0	0	0
1	1	0	0	59.0267	0	0	0	0	1	1	0	0	0	1	0	0	0	1	0	0	0	0	0	0	0	0	0	0	0	2	0	0	0	1	0	1	0	0	0	34	0	37.1	35.6	0	0	0	0	0
0	1	0	1	63.4899	1	0	0	0	1	1	0	0	1	0	0	0	0	0	0	0	0	0	0	0	0	0	0	0	0	1	1	1	0	0	0	0	0	0	0	260	0	0	0	0	0	0	0	0
1	1	0	0	83.875	1	1	1	1	0	0	0	0	0	0	1	0	0	0	0	1	0	0	0	0	0	0	1	0	0	2	0	0	1	0	0	0	0	0	0	11	0	37.9	36.6	0	0	0	1	1
0	1	0	0	66.3999	1	0	1	0	1	1	1	1	0	1	1	0	0	0	0	0	0	0	0	0	1	0	1	0	0	1	1	1	0	1	0	1	1	0	0	28	0	0	0	0	0	0	0	0
1	1	0	0	65.078	0	0	0	1	0	1	0	0	0	0	1	0	0	0	0	0	0	0	0	0	1	0	1	1	0	2	0	0	0	0	0	0	0	0	0	26	0	37.1	35.6	0	0	0	0	0
1	1	0	1	62.693	1	0	0	0	0	0	1	1	0	0	1	0	0	0	0	1	0	0	0	0	0	0	1	0	0	4	0	1	0	0	0	0	1	0	0	26	0	37	0	0	0	0	1	0
0	1	0	0	35.9589	0	0	0	0	0	1	0	0	0	1	0	0	0	1	0	0	0	0	0	0	0	0	0	1	0	2	1	0	0	0	0	0	0	0	0	144	0	0	0	0	0	0	0	0
1	1	0	0	69.8925	1	0	0	0	0	1	0	0	0	0	1	0	0	1	0	0	0	0	0	0	0	0	0	1	1	2	0	0	0	0	0	0	0	0	0	20	0	37.1	35.6	0	0	0	0	0
0	1	0	0	66.1031	1	0	0	0	0	1	0	0	0	1	0	0	0	0	0	0	0	0	0	0	0	0	0	1	0	1	1	1	0	0	0	0	0	0	0	67	0	0	0	0	0	0	0	0
1	0	0	0	57.5315	1	0	0	0	1	1	0	0	0	0	0	0	0	0	0	1	0	0	0	0	0	0	1	0	0	2	1	1	0	0	0	0	0	0	0	3	1	38.8	0	0	0	0	0	0
1	1	0	1	54.7334	1	0	0	0	1	1	1	0	1	1	0	1	0	0	0	1	0	0	0	0	1	0	1	0	1	1	1	1	0	1	0	1	0	0	0	10	0	37.2	36	0	0	0	0	0
1	1	0	0	65.4047	0	0	0	0	0	1	1	1	0	0	1	0	0	0	0	0	0	0	0	0	0	0	0	1	0	2	0	0	0	0	0	0	0	0	0	60	0	36.2	35.6	0	0	0	0	0
1	1	0	0	29.6557	0	0	0	0	0	1	0	0	0	0	0	0	0	0	0	0	0	0	0	0	0	0	0	1	0	1	1	1	0	0	0	0	0	0	0	9	0	37.1	35.6	0	0	0	0	0
0	1	0	0	91.8845	0	1	0	0	1	1	0	0	0	0	0	0	0	0	0	0	0	0	0	0	1	0	1	1	0	1	1	1	1	1	1	1	0	0	0	8	0	0	0	0	0	0	0	0
0	1	0	0	87.2587	0	0	0	0	1	1	0	0	0	0	0	1	0	0	0	0	0	0	0	0	1	0	1	1	0	2	1	1	0	0	0	0	0	0	0	92	0	0	0	0	0	0	0	0
1	1	0	0	75.0154	1	1	0	1	0	1	1	1	0	0	0	0	0	0	0	0	0	0	0	0	1	0	1	0	1	1	1	1	1	0	0	0	0	0	0	4	0	37.3	35.3	0	0	0	0	0
0	1	1	0	57.4483	1	1	0	0	0	0	0	0	0	0	1	0	0	0	0	0	0	0	0	0	0	0	0	1	0	2	0	0	1	0	0	0	0	0	0	97	0	0	0	0	0	0	0	0
1	1	0	0	62.0397	0	0	1	0	1	1	1	1	0	0	1	0	0	0	0	0	0	0	1	0	1	0	1	1	0	3	0	0	1	0	0	0	0	0	0	53	0	34.8	34.8	0	0	0	0	0
0	1	0	0	73.6469	0	1	0	1	0	1	0	0	1	0	0	0	0	1	0	0	0	0	1	0	0	0	1	0	0	2	0	0	0	0	0	0	0	0	0	32	0	0	0	0	0	0	0	0
1	1	0	0	75.0785	1	0	0	1	0	0	0	0	0	0	1	0	0	0	0	0	0	0	0	0	0	0	0	0	0	4	1	1	0	0	0	0	0	0	0	6	0	36.8	35.7	0	0	0	1	1
1	1	0	0	57.2411	1	1	0	0	1	1	1	1	0	1	1	0	0	0	0	1	1	0	0	0	1	0	1	1	0	1	1	1	1	1	0	1	1	1	0	10	1	38.1	35.6	0	0	0	1	1
0	1	0	0	69.9404	1	0	0	0	0	1	0	0	0	0	0	0	0	0	0	0	0	0	1	0	0	0	1	1	0	2	1	0	0	0	0	0	0	0	0	81	0	0	0	0	0	0	0	0
1	1	0	0	76.8231	0	0	0	0	0	1	0	0	0	1	1	0	1	0	0	0	0	0	0	0	0	0	0	0	0	2	0	0	0	0	0	0	0	0	0	13	0	36.4	32.7	0	1	0	0	0
1	1	0	0	74.4224	1	0	0	0	0	1	0	1	1	0	0	0	0	0	0	0	1	0	0	0	1	0	1	1	0	1	1	1	0	0	0	0	0	0	0	11	0	36.5	35.8	0	0	0	0	0
1	1	0	0	59.8074	1	0	0	0	0	1	1	0	1	0	0	1	0	0	0	0	0	0	1	0	1	0	1	0	0	1	1	1	0	0	0	0	0	0	0	8	0	36.4	36.4	0	0	0	0	0
1	1	0	1	45.1873	1	1	0	1	0	0	0	0	0	0	0	0	0	0	0	1	0	0	0	0	0	0	1	0	0	2	0	0	0	0	0	0	0	0	0	16	0	37.4	35.3	1	0	0	1	1
0	1	0	0	60.5148	1	0	0	0	0	1	0	0	0	0	0	0	0	1	0	0	0	0	0	0	0	0	0	1	0	2	1	0	0	1	0	0	0	0	0	48	0	0	0	0	0	0	0	0
1	1	0	0	52.8582	0	0	0	0	0	1	0	0	0	0	0	0	0	1	0	1	0	1	0	0	1	1	1	0	1	1	1	1	0	0	0	0	0	0	0	7	0	36.6	35.8	0	0	0	0	0
1	1	0	1	78.7655	1	0	1	0	0	1	0	0	0	0	0	0	0	0	0	1	0	0	0	0	0	0	1	1	0	4	1	1	0	1	0	0	0	0	0	24	0	37.5	35.7	1	0	0	1	0
1	1	0	0	63.6564	0	1	1	0	1	1	1	1	0	1	1	1	1	0	0	1	1	0	0	0	1	0	1	0	0	4	1	1	0	0	0	0	1	0	0	38	0	37.2	35.7	0	0	0	0	0
1	1	0	0	56.1646	1	0	0	0	0	0	0	0	0	0	1	1	0	0	0	0	0	0	1	0	0	0	1	1	0	2	0	0	0	0	0	0	0	0	0	18	1	38.1	38.1	0	0	0	0	0
0	1	0	0	63.0546	1	1	0	0	0	1	1	0	0	1	1	1	0	1	0	0	0	0	1	0	1	0	1	0	0	1	1	1	0	0	0	0	0	0	0	29	0	0	0	0	0	0	0	0
1	1	0	0	58.9295	0	0	0	0	0	1	0	0	0	0	0	1	1	0	0	0	0	0	0	0	1	0	1	1	0	1	1	1	0	0	0	0	0	0	0	61	0	37.1	35.6	0	0	0	0	0
1	1	0	0	75.5973	1	1	0	0	0	0	1	1	0	1	1	0	0	0	0	0	0	0	1	0	0	0	1	1	0	2	0	1	1	0	0	0	0	0	0	9	0	37.1	35.6	0	0	0	1	1
1	1	0	1	54.7723	1	1	1	1	0	1	1	1	0	0	1	1	0	0	0	1	0	0	0	0	0	1	1	0	0	1	1	1	0	0	0	0	0	0	0	43	1	38.1	36.3	0	0	0	0	0
1	1	0	0	86.4237	1	0	0	0	1	1	0	0	0	0	1	1	0	0	0	0	0	0	0	0	1	1	1	1	0	2	0	1	0	0	0	0	0	0	0	62	0	37.1	35.6	0	0	0	0	0
1	1	0	0	61.5432	0	0	0	1	0	1	1	1	0	0	0	0	1	0	0	1	1	0	0	0	1	0	1	0	0	2	0	0	0	0	0	0	0	0	0	9	0	37.1	36.3	0	0	0	0	0
1	1	0	0	84.7127	1	1	0	1	0	1	1	0	0	0	0	1	0	0	0	0	0	1	0	0	1	1	1	1	0	2	1	0	0	0	0	0	0	0	0	6	0	37.9	34.8	0	0	0	0	0
0	1	0	0	60.6194	1	0	0	0	1	1	1	0	0	0	0	1	0	0	0	0	0	0	0	0	1	0	1	1	0	1	1	1	0	0	0	0	0	0	0	38	0	0	0	0	0	0	0	0
1	1	0	0	51.1824	0	0	0	0	0	0	0	0	0	1	0	0	0	1	0	0	0	0	0	0	1	0	1	0	0	1	1	1	1	0	0	0	0	0	0	30	0	37.1	35.6	0	0	0	0	0
0	1	0	0	79.5772	1	0	0	1	0	0	1	0	0	0	0	1	0	1	0	0	0	0	1	0	0	0	1	0	0	2	0	0	0	0	0	0	0	0	0	93	0	0	0	0	0	0	0	0
1	0	0	0	70.0057	0	0	0	0	0	0	1	1	0	0	1	1	0	0	0	0	0	0	0	0	1	0	1	0	0	2	1	0	0	0	0	0	0	0	0	10	0	37.1	36	0	0	0	1	0
1	1	0	1	65.4606	1	0	0	1	1	1	1	1	0	0	1	0	0	0	0	0	0	0	0	0	1	1	1	0	1	2	0	1	1	0	0	0	0	0	0	55	0	36.6	33.8	0	0	0	0	0
0	1	0	0	33.4616	0	0	0	0	0	0	0	0	0	0	0	0	0	0	0	0	0	0	0	0	0	0	0	1	0	2	0	0	0	0	0	0	0	0	0	31	0	0	0	0	0	0	0	0
0	1	0	0	65.7035	0	0	0	0	0	1	1	0	0	1	0	0	0	1	0	0	0	0	0	0	1	0	1	1	0	1	1	1	0	0	0	0	0	0	0	66	0	0	0	0	0	0	0	0
1	0	0	0	62.0528	1	0	0	0	0	0	0	0	0	0	0	1	1	1	0	0	0	0	0	0	1	0	1	1	0	1	1	1	0	0	0	0	0	0	0	21	0	36.5	36.2	0	0	0	1	0
0	1	0	0	68.3784	0	0	0	0	0	0	0	0	0	0	0	0	0	1	0	0	0	0	0	0	0	0	0	1	0	2	0	0	0	0	0	0	0	0	0	74	0	0	0	0	0	0	0	0
1	1	0	0	77.8473	0	0	0	1	0	1	0	1	1	1	1	1	0	0	0	0	0	1	1	1	1	0	1	1	1	2	0	0	0	0	0	0	0	0	0	17	0	37.1	35.6	0	0	0	0	0
1	1	0	0	52.1108	1	0	0	0	1	1	0	0	0	0	1	0	0	1	0	1	1	0	0	0	0	0	1	0	0	2	0	0	0	0	0	0	0	0	0	43	0	37.1	35.6	0	0	0	0	0
0	1	0	0	42.5391	1	1	0	0	0	1	0	0	0	0	0	0	0	0	0	0	0	0	0	0	1	0	1	0	1	1	1	1	0	0	0	0	0	0	0	42	0	0	0	0	0	0	0	0
1	0	0	0	71.5677	1	0	0	0	0	1	1	1	0	0	0	1	0	0	0	1	0	0	0	0	1	0	1	1	0	2	1	1	0	0	0	0	0	0	0	3	1	40.1	37.1	0	0	0	0	0
0	1	0	0	76.401	1	0	0	0	0	0	0	0	0	0	1	1	0	0	0	0	0	0	0	0	0	0	0	0	0	2	0	0	0	0	0	0	0	0	0	66	0	0	0	0	0	0	0	0
1	1	0	0	82.6811	0	1	0	0	0	1	1	1	0	0	0	1	0	0	0	0	1	0	0	0	0	0	1	1	1	2	0	0	0	0	0	0	0	0	0	20	0	37.8	35.8	0	0	0	0	0
0	1	0	0	41.7486	1	0	0	1	1	1	1	1	0	0	0	0	0	0	0	0	0	1	1	0	1	0	1	0	0	1	1	1	0	0	0	0	0	0	0	30	0	0	0	0	0	0	0	0
0	1	0	1	75.35	0	1	0	1	0	1	1	1	1	0	1	0	0	0	0	0	0	0	0	0	1	0	1	0	0	2	0	0	0	0	0	0	0	0	1	56	0	34	34	0	0	0	0	0
0	1	0	0	32.6315	1	0	0	0	0	1	0	0	0	0	0	1	0	1	0	0	0	0	0	0	0	0	0	0	0	2	0	0	0	0	0	0	0	0	0	109	0	0	0	0	0	0	0	0
0	1	0	0	61.279	1	0	0	0	0	0	0	0	0	0	0	0	0	0	0	0	0	0	1	0	1	0	1	1	0	2	0	0	0	0	0	0	0	0	0	58	0	0	0	0	0	0	0	0
1	0	0	0	64.1255	1	0	0	0	0	0	0	0	0	0	0	0	0	1	0	0	0	0	0	0	1	1	1	1	1	1	1	1	1	0	0	0	0	0	0	27	1	39	36	0	0	0	1	0
1	1	0	0	46.7936	1	0	0	0	0	1	1	0	1	0	0	0	0	0	0	1	1	0	0	0	0	0	1	0	1	2	0	0	1	0	0	0	0	0	0	4	1	38.8	36.4	0	0	0	0	0
1	1	0	0	70.0546	1	0	1	1	0	1	1	0	0	0	1	0	0	0	0	0	1	0	0	0	1	1	1	0	1	1	1	1	0	0	0	0	0	0	0	8	0	36.4	33.6	1	0	0	0	0
0	1	0	0	31.0673	1	0	0	0	0	1	1	1	0	0	0	0	1	0	0	0	0	0	0	0	1	0	1	0	0	1	1	1	0	0	0	0	1	0	0	29	0	0	0	0	0	0	0	0
0	1	0	0	43.3581	1	0	0	0	0	1	0	0	0	0	0	0	0	0	0	0	0	0	1	0	1	0	1	0	1	1	1	1	0	0	0	0	0	0	0	5	0	0	0	0	0	0	0	0
1	1	0	0	47.1824	0	1	0	0	1	1	1	0	0	0	0	0	0	0	0	1	0	1	0	0	1	1	1	0	0	1	1	1	0	0	0	0	0	0	0	18	0	37.3	34.9	0	0	0	0	0
1	1	0	1	46.5548	1	1	0	0	0	1	1	1	0	0	0	0	0	0	0	1	0	0	0	0	0	1	1	1	1	2	1	1	0	0	0	0	0	0	0	22	0	36.5	35.4	0	0	0	0	0
1	1	0	0	55.727	1	0	0	1	0	1	0	0	0	0	0	1	0	0	0	0	0	0	0	0	1	0	1	1	0	1	1	1	0	0	0	0	0	0	0	5	0	36.9	36.9	0	0	0	0	0
0	1	0	0	57.0699	0	0	0	0	0	0	0	0	0	0	0	1	0	1	0	0	0	0	0	0	0	0	0	1	0	2	0	0	0	0	0	0	0	0	0	155	0	0	0	0	0	0	0	0
0	1	0	0	60.7456	1	0	0	0	0	1	0	0	0	0	0	1	0	1	0	0	0	0	0	0	1	0	1	0	0	1	1	1	0	0	0	0	0	0	0	35	0	0	0	0	0	0	0	0
1	1	0	0	64.0919	1	0	0	0	0	1	0	0	0	0	0	1	0	0	0	0	0	0	0	0	1	0	1	0	0	2	0	0	0	0	0	0	0	0	0	9	0	37.1	35.6	0	0	0	0	0
0	1	0	0	20.9102	1	0	0	0	0	1	1	0	1	1	0	0	0	1	0	0	0	0	1	0	1	0	1	0	0	1	1	1	0	0	0	0	0	0	0	81	0	0	0	0	0	0	0	0
0	1	0	0	68.2927	1	0	0	1	0	0	0	0	0	0	1	1	0	0	0	0	0	0	0	0	0	0	0	1	0	2	1	1	0	0	0	0	0	0	0	43	0	0	0	0	0	0	0	0
1	1	0	0	81.4178	0	0	0	0	0	1	1	1	0	0	0	0	1	1	0	0	0	0	1	0	1	0	1	1	1	1	1	1	0	0	0	0	1	0	0	10	0	37.1	35.6	0	0	0	0	0
1	1	0	0	50.4892	1	0	0	0	1	1	0	0	0	1	0	1	1	0	0	1	1	1	0	0	1	1	1	1	0	1	1	1	0	0	0	0	0	0	0	7	0	35.2	35	0	0	0	0	0
0	1	0	0	26.6314	1	0	0	0	0	1	0	0	0	0	0	0	0	1	0	0	0	0	0	0	1	0	1	1	0	1	1	1	0	0	0	0	0	0	0	40	0	0	0	0	0	0	0	0
0	1	0	0	68.5994	1	0	0	0	0	1	0	0	1	0	0	0	0	1	0	0	0	0	0	0	0	0	0	1	0	2	1	1	0	0	0	0	0	0	0	10	0	0	0	0	0	0	0	0
0	1	0	0	69.8049	1	0	0	0	0	0	0	0	1	0	0	0	1	0	0	0	0	0	0	0	0	0	0	1	1	2	0	0	0	0	0	0	0	0	0	27	0	0	0	0	0	0	0	0
0	1	0	0	74.8169	1	0	0	0	0	1	1	0	0	1	1	0	0	1	0	0	0	0	0	0	1	0	1	1	0	1	1	1	0	0	0	0	0	0	0	54	0	0	0	0	0	0	0	0
1	1	0	0	68.9234	0	0	0	0	0	1	1	0	0	0	0	1	0	0	0	0	0	0	1	0	1	0	1	1	0	2	1	1	0	0	0	0	0	0	0	18	1	40.1	36.6	0	0	0	1	0
1	1	0	0	79.0763	1	0	0	0	0	1	1	0	0	0	1	0	1	0	0	0	0	0	0	0	0	1	1	0	1	2	1	0	0	0	0	0	0	0	0	20	0	37.1	35.9	0	0	0	0	0
1	1	0	0	62.6076	1	0	0	0	0	1	0	0	0	0	0	0	0	1	0	0	0	0	0	0	1	1	1	0	1	1	1	1	0	0	0	0	0	0	0	22	1	38.1	35.5	0	0	0	0	0
0	1	0	0	21.0133	0	0	0	0	1	1	0	0	0	0	0	1	0	0	0	0	0	0	0	0	1	0	1	1	1	1	1	1	1	0	0	0	0	0	0	13	0	0	0	0	0	0	0	0
1	1	0	0	60.3842	0	0	0	0	0	1	0	0	0	0	1	0	0	0	0	0	0	0	0	0	0	1	1	1	0	2	1	0	0	0	0	0	0	0	0	7	0	36.5	35.7	0	0	0	1	1
1	1	0	0	46.2141	0	1	0	0	0	0	0	0	1	0	0	0	0	0	0	0	0	0	1	0	0	0	1	0	1	2	0	0	0	0	0	0	0	0	0	21	1	38.4	34	0	0	0	1	0
0	1	1	0	55.4434	0	0	0	0	1	1	0	0	0	0	0	0	0	0	0	0	0	0	0	0	1	0	1	0	0	1	1	1	0	0	0	0	0	0	0	30	0	0	0	0	0	0	0	0
1	1	0	0	76.9211	0	0	1	1	0	1	0	0	0	0	1	0	0	0	0	0	0	1	1	1	1	0	1	0	0	2	0	1	1	1	0	0	0	0	0	48	0	37.1	35.6	0	0	0	0	0
1	1	0	1	40.6696	1	0	0	0	1	1	0	0	1	0	0	0	1	0	0	0	0	0	0	0	1	1	1	0	0	1	1	1	0	0	0	0	0	0	0	35	0	36.1	33.9	0	0	0	0	0
1	1	0	0	52.111	1	0	0	0	0	0	0	0	0	0	0	0	0	0	0	0	1	0	1	0	1	1	1	0	1	1	1	1	0	0	0	0	0	0	0	4	0	35.2	33	0	0	0	0	0
1	1	0	1	51.9982	1	0	1	1	0	1	1	0	0	1	1	0	0	0	0	1	1	0	0	0	0	0	1	1	1	1	1	1	0	0	1	1	0	0	1	25	0	37.1	33.2	1	0	0	1	1
1	1	0	0	64.9595	0	0	0	0	0	1	0	0	1	0	0	0	0	0	0	1	1	0	0	0	0	1	1	0	0	2	0	0	0	0	0	0	0	0	0	12	0	34.7	34.3	0	0	0	0	0
1	1	0	0	76.5175	1	0	1	0	0	1	1	0	0	0	1	0	0	0	0	0	0	0	0	0	1	1	1	1	0	2	0	0	0	0	0	0	0	0	0	24	0	37.1	35.6	0	0	0	0	0
1	1	0	0	55.4655	1	0	0	0	0	0	0	0	1	0	1	0	0	1	0	0	0	0	0	0	0	0	0	1	0	2	1	1	0	0	0	0	0	0	0	12	0	37.1	35.6	0	0	0	0	0
1	1	0	0	68.6365	1	0	0	0	0	1	0	0	0	0	0	1	0	0	0	0	0	1	1	0	1	1	1	0	0	2	1	0	0	0	0	0	0	0	0	10	0	36.1	35	0	0	0	0	0
0	1	1	0	55.5799	0	0	0	0	1	1	0	0	1	0	0	0	0	0	0	0	0	0	0	0	1	0	1	0	1	1	1	1	0	0	0	0	0	0	0	45	0	0	0	0	0	0	0	0
0	1	0	0	58.7952	1	0	0	0	0	0	0	0	0	0	0	0	0	0	0	0	0	0	0	0	0	0	0	1	0	2	1	0	0	0	0	0	0	0	0	36	0	0	0	0	0	0	0	0
1	1	0	0	58.2704	0	0	0	0	1	1	1	0	0	0	1	1	1	0	0	0	0	1	0	1	1	0	1	1	1	1	1	1	0	0	0	0	0	0	0	4	0	37.1	35.6	0	0	0	0	0
1	1	0	0	38.991	0	1	0	0	1	1	1	1	1	1	0	0	0	0	1	0	1	0	0	0	1	0	1	0	1	1	1	1	0	0	0	0	0	0	0	11	0	37.1	35.6	0	0	0	0	0
1	1	0	0	82.5812	0	1	0	1	0	1	0	0	0	0	1	1	0	0	0	0	0	0	0	0	1	0	1	1	1	2	0	0	0	0	0	0	0	0	0	10	0	36.5	34.6	0	0	0	1	0
0	1	0	1	67.2384	1	0	1	0	0	0	0	0	0	0	1	0	0	0	0	1	0	0	0	1	1	0	1	1	1	2	0	0	0	0	0	0	0	0	0	75	0	0	0	0	0	0	0	0
1	1	0	0	64.3615	0	0	0	0	0	1	0	0	0	0	0	0	0	1	0	0	0	0	1	0	1	1	1	1	0	1	1	1	0	0	0	0	0	0	0	52	0	35.9	34	0	0	0	0	0
0	1	0	0	66.8993	0	1	0	0	0	1	0	0	0	0	0	1	0	0	0	0	0	0	0	0	1	0	1	1	1	1	1	1	0	0	0	0	0	0	0	36	0	0	0	0	0	0	0	0
1	1	0	0	47.3423	1	0	0	0	0	0	0	0	0	0	0	0	0	0	0	0	0	0	0	0	1	0	1	1	0	1	1	1	0	0	0	0	0	0	0	7	1	38.7	36.9	0	0	0	1	1
1	0	0	0	69.6253	1	0	0	0	0	1	0	0	0	0	0	0	0	0	0	0	1	0	0	0	1	0	1	0	0	1	1	1	0	0	0	0	0	0	0	4	0	37.2	36.3	0	0	0	0	0
1	1	0	0	83.7522	0	1	0	0	1	1	1	1	0	0	0	0	0	0	0	1	1	0	0	0	1	1	1	0	0	1	1	1	0	0	0	0	0	0	0	15	0	37.1	35.6	0	0	0	0	0
1	1	0	0	51.3995	0	0	0	0	1	1	1	1	0	1	0	0	1	0	0	0	0	0	0	0	1	1	1	0	1	1	1	1	1	0	0	0	0	0	0	10	0	37.1	35.6	0	0	0	0	0
1	0	0	0	42.5804	1	1	0	0	0	1	1	0	1	0	0	0	0	1	0	0	0	0	0	0	1	0	1	0	0	1	1	1	0	0	0	0	0	0	0	3	1	38.2	35.7	0	0	0	0	0
1	1	0	0	58.0997	1	0	0	0	1	1	0	0	0	0	1	1	0	1	0	0	0	0	1	0	1	0	1	1	0	1	1	1	0	0	0	0	0	0	0	3	0	37.1	35.6	0	0	0	0	0
1	1	0	1	65.1977	1	1	0	0	1	1	1	1	0	1	0	0	0	0	0	0	0	0	0	0	1	0	1	0	0	1	1	1	0	0	0	0	0	0	0	23	0	找不到	0	0	0	0	0	0
1	1	0	0	65.5481	0	0	0	0	1	1	1	0	0	0	1	1	0	0	0	0	0	0	0	0	1	1	1	0	0	1	1	1	0	0	0	0	0	0	0	6	0	37.4	36	0	0	0	0	0
0	1	0	0	86.786	0	0	0	0	0	1	0	0	0	1	0	1	0	0	0	0	0	0	0	0	0	0	0	0	0	2	0	0	0	0	0	0	0	0	0	22	0	0	0	0	0	0	0	0
1	1	0	1	40.4165	1	0	0	0	0	1	1	1	0	0	1	0	0	0	0	0	0	0	0	0	1	1	1	1	0	1	1	1	0	0	0	0	0	0	0	12	0	37.3	35.9	0	0	0	1	1
1	1	0	0	60.2461	0	0	0	0	0	1	0	0	1	0	1	0	1	0	0	0	0	0	0	0	1	0	1	1	0	1	1	1	0	0	0	0	0	0	0	23	0	37.1	35.6	0	0	0	0	0
1	1	0	0	68.3676	1	0	0	0	0	0	1	0	0	1	1	0	0	1	0	0	0	0	0	0	1	0	1	1	0	2	0	0	0	0	0	0	0	0	0	27	0	37.1	35.6	0	0	0	0	0
0	1	0	0	83.8851	1	0	0	1	0	1	0	0	0	0	0	1	0	0	0	0	0	0	0	0	1	0	1	1	0	1	1	1	0	0	0	0	0	0	0	53	0	0	0	0	0	0	0	0
0	1	0	0	49.9031	1	0	0	0	0	1	0	0	0	0	0	1	0	1	0	0	0	0	1	0	1	0	1	1	1	1	1	1	0	0	0	0	0	0	0	28	0	0	0	0	0	0	0	0
1	1	0	1	63.5025	1	0	1	0	1	1	0	1	0	0	1	0	0	0	0	1	0	0	0	0	1	1	1	1	0	1	1	1	0	0	0	0	0	0	0	13	0	36.3	35	1	0	0	0	0
0	1	0	0	47.7757	1	0	0	0	0	1	0	0	0	0	1	0	0	0	0	0	0	0	0	0	0	0	0	1	0	2	0	0	0	0	0	0	0	0	0	54	0	0		0	0	0	0	0
1	0	0	0	57.9401	1	0	0	0	0	0	0	0	0	0	0	0	0	0	0	0	0	0	0	0	0	0	0	0	0	2	0	0	0	0	0	0	0	0	0	7	0	36.8	36	0	0	0	1	1
1	1	0	1	22.8501	0	0	0	1	1	1	1	1	0	1	0	0	0	0	0	0	1	0	0	0	1	1	1	1	0	1	1	1	0	0	0	0	0	0	0	16	0	37.2	35.9	0	0	0	0	0
1	1	0	0	54.6628	1	1	0	0	0	1	1	1	0	0	0	0	0	0	0	0	0	0	0	0	1	1	1	0	0	1	1	1	0	0	0	0	0	0	0	9	0	37.8	36.6	0	0	0	1	1
0	1	0	0	53.092	1	0	0	1	0	1	1	1	1	1	0	0	0	0	0	1	1	0	1	0	0	1	1	1	1	2	0	0	0	0	0	0	0	0	0	0	0	0	0	0	0	0	0	0
1	1	0	0	52.5115	0	1	0	1	1	1	1	0	0	1	1	0	1	1	0	0	0	0	0	0	1	0	1	1	0	1	1	1	0	0	0	0	1	0	0	35	0	37.1	35.6	0	0	0	0	0
0	1	0	1	76.1379	0	0	0	0	0	1	0	0	0	0	0	1	0	0	0	0	0	0	0	0	1	0	1	0	0	2	1	0	0	0	0	0	0	0	0	22	0	35.9	35.2	0	0	0	0	0
1	1	0	0	43.3513	1	0	0	0	1	1	1	1	1	0	0	0	0	0	0	1	1	0	1	0	1	1	1	1	1	2	0	0	0	0	0	0	0	0	0	45	0	37.2	36.2	0	0	0	0	0
1	1	0	1	72.7628	0	1	1	1	0	1	0	0	0	0	1	0	0	0	0	1	0	0	1	0	1	0	1	0	0	2	0	0	1	0	0	0	0	0	0	12	0	37.3	36	0	0	0	1	1
1	0	0	1	40.2206	1	0	0	0	0	1	1	1	0	0	1	0	0	0	0	1	0	0	0	0	1	1	1	0	0	2	0	1	0	0	0	0	0	0	0	7	0	36.8	36.4	0	0	0	0	0
1	1	0	1	50.5228	0	1	0	1	0	1	1	1	0	0	1	1	1	0	0	1	1	0	0	0	1	0	1	0	1	1	1	1	1	0	0	0	1	0	1	38	1	38	36.3	0	0	0	1	0
0	1	0	0	39.4942	1	0	0	0	0	1	0	0	0	0	0	1	0	0	0	0	0	0	0	0	0	0	0	1	0	2	0	0	0	0	0	0	0	0	0	35	0	0	0	0	0	0	0	0
0	1	0	0	60.5016	1	0	0	0	0	1	1	1	1	0	0	0	0	0	0	0	0	0	0	0	1	0	1	1	1	1	1	1	0	0	0	0	0	0	0	30	0	0	0	0	0	0	0	0
1	1	0	0	82.9345	0	1	0	1	0	1	0	0	0	0	0	1	0	0	0	0	0	0	1	0	1	0	1	1	1	1	1	1	1	0	0	0	0	0	0	3	0	37.9	36.1	0	0	0	0	0
1	1	0	0	75.2736	1	1	1	0	0	1	0	0	0	0	0	0	0	0	0	0	0	0	1	0	1	0	1	0	0	1	1	1	0	0	0	0	0	0	0	37	0	37.1	35.6	0	0	0	0	0
0	1	0	0	76.9268	1	0	1	1	1	1	0	0	0	0	0	0	0	0	0	0	0	0	0	0	1	0	1	0	0	1	1	1	1	0	0	0	0	0	0	28	0	0	0	0	0	0	0	0
1	1	0	0	87.2955	0	1	0	0	0	1	1	0	0	0	0	1	0	0	0	0	0	0	0	0	1	0	1	0	0	1	1	1	0	0	0	0	0	0	0	13	0	37.3	36	0	0	0	1	0
1	1	0	0	56.5597	1	1	0	1	1	1	1	0	1	0	1	1	1	0	0	0	0	0	0	0	1	0	1	0	0	1	1	1	1	0	0	0	0	0	0	23	0	37.1	35.6	0	0	0	0	0
0	1	0	0	86.7529	1	0	1	0	1	1	0	0	0	0	0	0	0	0	0	0	0	0	0	0	1	0	1	0	0	2	0	0	0	0	0	0	0	0	0	45	0	0	0	0	0	0	0	0
1	1	0	1	18.258	0	0	0	0	1	1	0	0	0	0	0	0	0	0	0	1	1	0	0	0	1	0	1	1	0	1	1	1	0	0	0	0	0	0	0	6	0	36.7	36.5	0	0	0	0	0
0	1	0	0	63.955	1	0	0	0	1	1	1	1	0	0	0	1	0	1	0	0	0	1	1	0	1	0	1	0	0	1	1	1	0	0	0	0	0	0	0	33	0	0	0	0	0	0	0	0
1	1	0	0	78.5738	1	0	0	0	0	1	1	0	0	0	1	1	0	0	0	0	0	1	0	1	1	0	1	1	0	2	0	0	0	0	0	0	0	0	0	12	1	38.3	36	0	0	0	0	0
1	1	0	0	76.6827	1	0	1	0	0	0	1	1	0	0	1	1	0	0	0	0	0	0	0	0	0	1	1	0	0	2	0	0	0	0	0	0	0	0	0	5	0	36.5	36.1	0	0	0	0	0
1	1	0	0	87.3432	0	1	1	1	0	1	0	0	0	1	1	0	0	0	0	0	0	1	0	1	1	1	1	1	1	2	1	1	0	0	0	0	0	0	0	11	1	38.4	36.3	0	0	0	1	1
1	1	0	0	52.8702	0	0	0	0	0	0	0	0	1	0	0	0	0	0	0	1	0	0	1	0	1	1	1	1	0	2	0	0	0	0	0	0	0	0	0	15	0	35.4	32.6	0	0	0	0	0
0	1	0	0	51.7193	0	0	0	0	0	1	1	1	1	0	1	1	1	1	0	0	0	0	0	0	1	0	1	0	0	1	1	1	0	0	0	0	1	0	0	13	0	0	0	0	0	0	0	0
1	1	0	0	57.8063	0	1	0	0	0	1	0	0	0	0	0	1	0	0	0	0	0	0	1	0	1	1	1	1	0	2	0	0	0	0	0	0	0	0	0	55	0	36.7	35.2	0	0	0	0	0
1	1	0	1	68.4313	1	0	1	0	0	1	0	0	0	0	0	0	0	0	0	0	0	0	0	0	0	0	0	0	0	4	1	1	0	0	0	0	0	0	0	18	1	38.5	35	0	0	0	1	1
0	1	0	0	63.1246	1	1	0	0	0	1	0	0	0	1	0	1	0	0	0	0	0	1	1	1	1	0	1	1	0	1	1	1	0	0	0	0	0	0	0	31	0	0	0	0	0	0	0	0
1	1	0	0	76.5285	1	1	0	0	0	1	1	1	1	1	1	0	0	0	0	1	0	0	0	0	0	0	1	1	0	2	0	0	0	0	0	0	0	0	0	40	0	36.5	35	0	0	0	0	0
1	1	0	0	87.3548	0	0	0	0	0	0	0	0	0	0	0	0	0	0	0	0	0	0	0	0	0	0	0	1	0	3	1	0	0	0	0	0	0	0	0	8	0	35.5	31.9	0	1	0	1	0
1	1	0	0	81.0574	1	0	0	0	0	1	0	0	0	0	0	0	0	0	0	1	1	0	0	0	1	0	1	1	0	3	1	0	0	0	0	0	0	0	0	6.6	0	36	32.7	0	1	0	1	1
1	1	0	0	69.7725	1	1	1	0	0	0	1	0	0	0	1	0	0	0	0	1	0	0	0	0	0	0	1	0	0	3	1	1	0	0	0	0	0	0	0	10	0	35.5	31.9	0	1	0	0	0
1	1	0	0	73.628	1	0	0	0	0	0	0	0	0	0	0	0	0	0	0	0	0	0	0	0	1	0	1	0	0	3	1	1	0	0	0	0	0	0	0	41	0	35.9	29.9	0	1	0	0	0
1	1	0	0	67.4552	0	0	0	0	0	0	0	0	0	0	0	0	0	0	0	1	0	0	0	0	0	0	1	1	0	3	1	0	1	0	0	0	0	0	0	4	0	37.6	32.8	0	1	0	0	0
1	1	1	0	73.7638	1	0	0	0	0	1	1	0	0	0	1	1	0	0	0	0	1	0	0	0	1	0	1	1	0	4	1	0	1	0	0	0	0	0	0	12	0	35.4	31	0	1	0	1	1
1	1	0	0	24.977	1	0	0	0	0	0	0	0	0	0	0	0	0	0	0	0	0	0	0	0	1	0	1	1	0	3	1	1	0	0	0	0	0	0	0	19	0	36.8	32.4	0	1	0	1	0
1	1	0	0	41.2923	0	0	0	0	0	0	0	0	0	1	0	0	0	0	0	0	0	0	0	0	1	0	1	1	1	3	1	1	0	0	0	0	0	0	0	6	0	35.8	31.4	0	1	0	0	0
1	1	0	0	35.7744	0	0	0	0	1	1	0	0	0	1	0	0	0	0	0	0	0	0	0	0	1	0	1	0	0	3	1	1	0	0	0	0	0	0	0	24	0	35.5	31.9	0	1	0	1	1
1	1	0	0	62.279	0	0	1	0	0	1	0	0	0	0	0	1	0	0	0	0	0	0	0	0	1	0	1	0	0	3	1	1	0	0	0	0	0	0	0	22	0	36	31.7	0	1	0	0	0
1	1	0	0	68.6398	1	1	0	0	0	0	0	0	1	1	1	0	0	0	0	0	0	0	0	0	0	0	0	0	0	3	1	0	1	0	0	0	0	0	0	29	0	35.1	32.5	1	1	0	1	1
1	1	0	0	31.836	0	0	0	0	0	0	1	1	0	1	0	0	0	0	0	1	0	0	0	0	1	0	1	1	1	3	1	1	1	0	0	0	0	0	0	10	0	33.2	32	0	1	0	1	1
